# Supplementary material for: Strategies for enhancing the initiation of cholesterol lowering medication among patients at high cardiovascular disease risk: a qualitative descriptive exploration of patient and general practitioners’ perspectives on a facilitated relay intervention in Alberta, Canada
Source: PubMed Central journal article supplement — BMJ Open. 2020 Nov 24;10(11):e038469. doi: 10.1136/bmjopen-2020-038469 (PMC7689086; doi:10.1136/bmjopen-2020-038469), 2020-11-24
Supplement: bmjopen-2020-038469.draft_revisions.pdf [file bmjopen-2020-038469.draft_revisions.pdf]

# BMJ Open

BMJ Open is committed to open peer review. As part of this commitment we make the peer review history of every article we publish publicly available.

When an article is published we post the peer reviewers' comments and the authors' responses online. We also post the versions of the paper that were used during peer review. These are the versions that the peer review comments apply to.

The versions of the paper that follow are the versions that were submitted during the peer review process. They are not the versions of record or the final published versions. They should not be cited or distributed as the published version of this manuscript.

BMJ Open is an open access journal and the full, final, typeset and author-corrected version of record of the manuscript is available on our site with no access controls, subscription charges or pay-per-view fees (<http://bmjopen.bmj.com>).

If you have any questions on BMJ Open's open peer review process please email [info.bmjopen@bmj.com](mailto:info.bmjopen@bmj.com)

# BMJ Open

## Strategies for Enhancing Cholesterol Lowering Medication Use Among Patients at High Cardiovascular Disease Risk: Patient and General Practitioners' Perspectives on a Facilitated Relay Intervention

|                               |                                                                                                                                                                                                                                                                                                                                                                                                                                                                                                                                                                                                                                                                                                                                              |
|-------------------------------|----------------------------------------------------------------------------------------------------------------------------------------------------------------------------------------------------------------------------------------------------------------------------------------------------------------------------------------------------------------------------------------------------------------------------------------------------------------------------------------------------------------------------------------------------------------------------------------------------------------------------------------------------------------------------------------------------------------------------------------------|
| Journal:                      | <i>BMJ Open</i>                                                                                                                                                                                                                                                                                                                                                                                                                                                                                                                                                                                                                                                                                                                              |
| Manuscript ID                 | bmjopen-2020-038469                                                                                                                                                                                                                                                                                                                                                                                                                                                                                                                                                                                                                                                                                                                          |
| Article Type:                 | Original research                                                                                                                                                                                                                                                                                                                                                                                                                                                                                                                                                                                                                                                                                                                            |
| Date Submitted by the Author: | 12-Mar-2020                                                                                                                                                                                                                                                                                                                                                                                                                                                                                                                                                                                                                                                                                                                                  |
| Complete List of Authors:     | Campbell, David; University of Calgary Cumming School of Medicine, Department of Medicine<br>Lee, Rachelle; University of Ottawa<br>McBrien, Kerry; University of Calgary, Family Medicine<br>Anderson, Todd; University of Calgary Cumming School of Medicine, Department of Cardiac Sciences<br>Quan, Hude; University of Calgary, Community Health Sciences<br>Leung, Alexander; University of Calgary Cumming School of Medicine, Department of Medicine<br>Chen, Guanmin<br>Lu, Mingshan ; University of Calgary, Economics<br>Naugler, Christopher; University of Calgary, Pathology and Laboratory Medicine; Calgary Laboratory Services,<br>Butalia, Sonia; University of Calgary Cumming School of Medicine, Department of Medicine |
| Keywords:                     | QUALITATIVE RESEARCH, GENERAL MEDICINE (see Internal Medicine), Quality in health care < HEALTH SERVICES ADMINISTRATION & MANAGEMENT, Cardiology < INTERNAL MEDICINE, PREVENTIVE MEDICINE                                                                                                                                                                                                                                                                                                                                                                                                                                                                                                                                                    |
|                               |                                                                                                                                                                                                                                                                                                                                                                                                                                                                                                                                                                                                                                                                                                                                              |

SCHOLARONE™  
Manuscripts

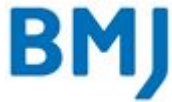

I, the Submitting Author has the right to grant and does grant on behalf of all authors of the Work (as defined in the below author licence), an exclusive licence and/or a non-exclusive licence for contributions from authors who are: i) UK Crown employees; ii) where BMJ has agreed a CC-BY licence shall apply, and/or iii) in accordance with the terms applicable for US Federal Government officers or employees acting as part of their official duties; on a worldwide, perpetual, irrevocable, royalty-free basis to BMJ Publishing Group Ltd ("BMJ") its licensees and where the relevant Journal is co-owned by BMJ to the co-owners of the Journal, to publish the Work in this journal and any other BMJ products and to exploit all rights, as set out in our [licence](#).

The Submitting Author accepts and understands that any supply made under these terms is made by BMJ to the Submitting Author unless you are acting as an employee on behalf of your employer or a postgraduate student of an affiliated institution which is paying any applicable article publishing charge ("APC") for Open Access articles. Where the Submitting Author wishes to make the Work available on an Open Access basis (and intends to pay the relevant APC), the terms of reuse of such Open Access shall be governed by a Creative Commons licence – details of these licences and which [Creative Commons](#) licence will apply to this Work are set out in our licence referred to above.

Other than as permitted in any relevant BMJ Author's Self Archiving Policies, I confirm this Work has not been accepted for publication elsewhere, is not being considered for publication elsewhere and does not duplicate material already published. I confirm all authors consent to publication of this Work and authorise the granting of this licence.

1  
2  
3 **Strategies for Enhancing Cholesterol Lowering Medication Use Among Patients at High Cardiovascular**  
4 **Disease Risk: Patient and General Practitioners' Perspectives on a Facilitated Relay Intervention**  
5

6 David J.T. Campbell, MD PhD FRCPC<sup>1,2,3</sup>

7 Rachelle C.W. Lee, MSc<sup>4</sup>

8 Kerry A. McBrien, MD MPH CCFP<sup>2,5</sup>

9 Todd J. Anderson, MD PhD FRCPC<sup>3</sup>

10 Hude Quan, MD PhD<sup>2</sup>

11 Alexander A.C. Leung, MD MPH FRCPC<sup>1,2,3</sup>

12 Guanmin Chen, MD PhD<sup>2</sup>

13 Mingshan Lu, PhD<sup>2,6</sup>

14 Christopher Naugler, MD FRCPC<sup>2,7</sup>

15 Sonia Butalia, MD MSc FRCPC<sup>1,2</sup>

16  
17  
18  
19 1 – Department of Medicine, Cumming School of Medicine, University of Calgary, Calgary, AB, Canada

20 2 – Department of Community Health Sciences, Cumming School of Medicine, University of Calgary,  
21 Calgary, AB, Canada

22 3 – Department of Cardiac Sciences, Cumming School of Medicine, University of Calgary, Calgary, AB,  
23 Canada

24 4 – Department of Innovation in Medical Education, Faculty of Medicine, University of Ottawa, Ottawa,  
25 ON, Canada

26 5 – Department of Family Medicine, Cumming School of Medicine, University of Calgary, Calgary, AB,  
27 Canada

28 6 – Department of Economics, Faculty of Arts, University of Calgary, Calgary, AB, Canada

29 7 – Department of Pathology & Laboratory Medicine, Cumming School of Medicine, University of  
30 Calgary, Calgary, AB, Canada

31  
32  
33 Correspondence:

34 Dr. David J.T. Campbell

35 TRW 3E33, 3280 Hospital Dr NW

36 Calgary, AB, Canada T2N 4Z6

37 [dcampbel@ucalgary.ca](mailto:dcampbel@ucalgary.ca)

38 403-210-9511  
39  
40

41 Word count: Main text (3926 words), abstract (272 words), 3 tables, 3 appendices  
42  
43  
44  
45  
46  
47  
48  
49  
50  
51  
52  
53  
54  
55  
56  
57  
58  
59  
60

**ABSTRACT**

**Objective:** The objective of our study was to explore the perspectives of patients and general practitioners (GPs) regarding interventions to increase cholesterol lowering medication (or statin) use, including a proposed laboratory-based facilitated relay intervention.

**Design:** Qualitative descriptive study using interviews and focus groups for data collection, and thematic analysis for data analysis.

**Setting:** Primary care providers and patients in Calgary, Alberta, Canada.

**Participants:** 17 General Practitioners with primarily community-based, non-academic practices with at least 1 year of practice experience participated in semi-structured interviews. 14 patients at high risk of cardiovascular disease participated in focus groups.

**Main outcome measures:** Exploration of strategies that might be used to enhance the prescription of, and adherence to statin therapy for patients with statin-indicated conditions.

**Results:** GPs proposed a variety of interventions to improve statin use, including electronic record audit solutions, GP directed education and patient-oriented campaigns. Patients expressed that they may benefit from being provided access to their laboratory test results, as well as targeted education. Both parties provided positive feedback on the proposed laboratory-based facilitated relay intervention, while pointing out areas for improvement. Notably, GPs were concerned that the patient-directed component of the intervention might jeopardize their therapeutic relationship, and patients were concerned about accidental disclosure of their personal information. Important considerations for the design of facilitated relay messaging should include brevity, simplicity and the provision of contact information for questions.

**Conclusions:** GPs and patients described several suggestions for increasing statin use and welcomed the proposal of a laboratory-based facilitated relay strategy. These findings support further testing of this intervention which may enhance GPs' ability to successfully engage patients in cardiovascular risk reduction through statin therapy.

**Keywords:** focus groups, qualitative research, interviews, statins, facilitated relay

## Strengths & Limitations of this Study

- This is a qualitative study, with relatively few participants – therefore we cannot say definitively if the views represented here represent those of all patients and prescribers.
- We sampled physician participants to the point of saturation, which means that we are confident the views represented here span the breadth of those held by physicians.
- The patient sample we recruited may not be representative of the broader population, as many of them had previously stated an interest in quality improvement and research.
- Given the context-dependent nature of qualitative data, the applicability of these findings to other settings is not certain.
- One of the major strengths of this study is the depth and richness of the qualitative data that were collected. By asking questions in an open-ended manner, we were able to record detailed accounts and opinions.

## INTRODUCTION

High cholesterol (or dyslipidemia) affects one-third of the general population and is a major risk factor for heart attacks and strokes(1-3). Several high quality randomized controlled trials show that people at high risk for cardiovascular disease (i.e. have a history of heart attack, stroke, diabetes, or chronic kidney disease) lower their risk of heart attack and death by reducing their cholesterol with a class of medications called statins. Despite over 30 years of clinical use, efficacy, safety and cost-effectiveness data (4, 5), only 23% to 55% of individuals who would benefit take this medication and fewer than half of individuals are treated to target cholesterol levels(4, 6-8). There is substantial unwanted variability in dyslipidemia management and health system intervention is required to promote equitable treatment (9, 10).

Evidence related to the management of other common cardiovascular risk factors, such as hypertension, provides insight into how this care gap may be closed(11-13). Integrated quality improvement strategies that target both patients and healthcare providers are more likely to achieve quality indicators than strategies which only target one aspect in isolation(12). One such strategy is facilitated relay. Facilitated relay is a quality improvement strategy whereby information about individual patients is sent directly to healthcare providers through a means other than the usual clinical encounter (14). This strategy has been shown to be effective in improving cardiovascular risk factors (12, 15), but it remains to be explored in the management of dyslipidemia. Despite this evidence, and the implementation of a number of quality improvement strategies for chronic disease management in our setting, facilitated relay remains among the least commonly used (16).

We therefore drew from behaviour change theory to develop a proposed facilitated relay intervention to increase statin uptake(17-19). Our proposed intervention uses our province's single laboratory system to identify individuals who have had their cholesterol levels measured, who are at high risk for cardiovascular disease and who are not filling statin prescriptions (i.e. identifying these individuals using validated algorithms). The general practitioner (GP) ordering the cholesterol levels and the patient, will then each receive a letter outlining the indication for treatment and the potential to benefit from statin therapy. The patient letter will encourage them to speak to their GP, and the GP letter will encourage them to make an appointment to discuss directly with the patient - both with the objective to initiate or renew statin prescriptions.

83 For an intervention to have the potential to maximum impact, it is important to have the input of key  
84 stakeholders prior to the application of any intervention with a qualitative study being suited to do  
85 so(20). This allows for the development of a higher quality intervention, rather than one that relies on  
86 physician feedback alone (21). As such, the objective of our study was to explore the perspectives of  
87 patients GPs regarding interventions to increase cholesterol lowering medication (or statin) use,  
88 including a proposed laboratory-based facilitated relay intervention.

## 90 **METHODS:**

### 92 **Study Design**

94 We conducted a qualitative descriptive study(20) to explore patients' and general practitioners'  
95 perspectives on interventions to increase cholesterol lowering medication (or statin) use . Specifically,  
96 we sought directed feedback and perceptions on the acceptability of the proposed facilitated relay  
97 intervention from both patients and GPs(22). We used the consolidated criteria for reporting qualitative  
98 research (COREQ) as the reporting framework for this study(23).

### 100 **Participant Selection**

102 *General Practitioners:* We recruited general practitioners to participate in individual interviews, using a  
103 snowball sampling approach. First, we asked key stakeholders in areas of primary care, endocrinology,  
104 nephrology and cardiology affiliated with the university medical centre, to recommend community-  
105 based (non-academic) GPs to participate in the study. Individuals were then contacted by telephone and  
106 email with a formal invitation to participate. GPs who met the following criteria were enrolled: (1)  
107 currently practicing in community general practice settings; and, (2) have at least one year of experience  
108 as a GP. We sampled participants purposively based on several key demographic characteristics in order  
109 to achieve representation across a range of ages, genders and practice types.

111 *Patients:* We recruited patients who may potentially be recipients of the intervention (i.e. those at high  
112 risk of cardiovascular disease). Using a convenience sampling approach, we invited patients who were  
113 part of an established advisory panel and previously agreed to be contacted about research  
114 opportunities for study participation(24, 25). In addition, patients were recruited using poster  
115 advertisements placed throughout the academic health sciences centre and in various clinical care areas  
116 where care is provided to patients with diabetes, heart disease and kidney disease.

### 118 **Data Collection**

120 We developed an open-ended semi-structured interview guide (Appendix A) and focus group guide  
121 (Appendix B) based on a review of the literature and discussion with the research team. Sensitive and  
122 personal disclosures are more likely to occur with focus groups and as such we used this methodology  
123 with patient participants(26). However, we purposely used different data collection methods to offset  
124 low recruitment of community based GPs due to their competing clinical demands and importantly  
125 wanted to recruit from both urban and rural locales.

127 Interview and focus group guides were designed so that they initially asked study participants what they  
128 thought would be effective strategies or interventions to improve statin use (i.e. prescribing, patient use  
129 and adherence). After they had given their unprompted views, participants were then given a brief

1  
2  
3 130 explanation of facilitated relay, the proposed intervention, and shown a copy of the proposed  
4 131 intervention letter (Appendix C) and asked for their feedback.

5 132  
6 133 All interviews were conducted in-person (in clinician offices) or via telephone, by a female trained  
7 134 research assistant (RCWL) with oversight by experienced study team members. None of the study team  
8 135 were acquainted with or involved in the clinical care of the participants. Physician interviews were  
9 136 continued until the point of theoretical saturation when no new information emerged from the  
10 137 interviews (27). Because the research objective was relatively focused, interviews were brief and lasted  
11 138 approximately 30 to 45 minutes. We convened two small focus groups of patients in our academic  
12 139 medical centre which each lasted approximately 90 minutes. No one but researchers (including 1  
13 140 facilitator and 2 field-note takers) and participants were present. Data was collected from September  
14 141 2018 to November 2018.

15 142  
16 143 Interviews and focus group proceedings were digitally audio-recorded and transcribed verbatim by a  
17 144 professional transcriptionist. Field notes were taken to inform data analysis. All data were anonymized  
18 145 and stored securely. Signed informed consent was received from each study participant. Gift cards were  
19 146 provided to all participants. Ethics approval was granted from the University's Health Research Ethics  
20 147 Board.

#### 21 148 22 149 **Data Analysis**

23 150  
24 151 Analysis was completed using conventional qualitative content analysis(28), a method of interpreting  
25 152 interview data with the goal of describing the phenomenon of interest. Transcripts for the initial three  
26 153 interviews were reviewed by three team members (DC, RL and SB), with the objective of inductively  
27 154 establishing a preliminary coding template that was used for subsequent data analysis. All transcripts  
28 155 were then analyzed by two reviewers (DC and RL). Codes were generated from the interview data and  
29 156 systematically applied to identify themes and patterns. The process was iterative, reflexive, and  
30 157 interactive as continual data collection and analysis shaped each other<sup>4</sup>. For example, code titles or  
31 158 definitions identified based on earlier interviews were modified according to the data collected during  
32 159 subsequent interviews. The team met together to review the coding to elicit discussion about the coding  
33 160 strategy and attempted to achieve consensus to resolve coding discrepancies. NVivo 12 (Doncaster,  
34 161 Australia) qualitative data analysis software was used to facilitate the coding process.

#### 35 162 36 163 **Patient and public involvement**

37 164  
38 165 Patient partners and family members from the Libin Cardiovascular Institute's established patient and  
39 166 family member advisory group voiced that *prevention* was one of their top research priorities for  
40 167 cardiovascular health. This work is related to prevention of cardiovascular disease. Patients were  
41 168 included in focus groups.

#### 42 169 43 170 **RESULTS**

44 171  
45 172 We reached saturation after having completed 17 individual interviews with GPs (Table 1a). 4 physicians  
46 173 declined participation in the interview. The majority were women (88%) with 65% having graduated  
47 174 from medical school within the last ten years. All GPs spent more than 50% of their time in clinical  
48 175 practice, at urban centers within Primary Care Networks (PCNs). PCNs are networks of GPs that share  
49 176 interdisciplinary resources to enhance the delivery of primary care within geographical regions(29); they  
50 177 are associated with improved chronic disease care and outcomes(30).



178

179 **Table 1a.** Descriptive statistics for Primary Care Providers (n = 17).

| Physician characteristics                     | Total (%) |
|-----------------------------------------------|-----------|
| Age (years)                                   |           |
| < 40                                          | 13 (76)   |
| 40 - 60                                       | 4 (24)    |
| Gender                                        |           |
| Man                                           | 2 (12)    |
| Woman                                         | 15 (88)   |
| Years of primary care practice                |           |
| < 10                                          | 14 (83)   |
| 10 – 20                                       | 3 (18)    |
| Years since medical school graduation         |           |
| < 10                                          | 11 (65)   |
| ≥10                                           | 6 (35)    |
| Primary Care Network membership               |           |
| Yes                                           | 15 (88)   |
| No                                            | 2 (12)    |
| Location of primary care practice             |           |
| Urban                                         | 13 (76)   |
| Rural                                         | 4 (24)    |
| Focused practice interest                     |           |
| Yes*                                          | 9 (53)    |
| No                                            | 8 (47)    |
| Clinical practice last 12 months              |           |
| Estimated number of patients at high CVD risk |           |
| < 20                                          | 1 (6)     |
| 20 to 99                                      | 7 (41)    |
| ≥100                                          | 9 (53)    |
| Use of endocrinology consultation services    |           |
| Yes                                           | 5 (29)    |
| No                                            | 12 (71)   |
| Use of cardiology consultation services       |           |
| Yes                                           | 10 (59)   |
| No                                            | 7 (41)    |
| Use of nephrology consultation services       |           |
| Yes                                           | 3 (18)    |
| No                                            | 14 (82)   |

180 \* Focused practice, or special interest types: care of the elderly (n = 2), emergency medicine (n = 1),  
 181 urgent care (n = 1), refugee medicine (n = 1), obstetrics (n = 2), indigenous health (n = 2), lactation (n =  
 182 1).

183  
184  
185 We hosted two focus groups for patients – one with 8 and another with 6 participants (Table 1b). There  
186 were no dominant members and all participants got equal opportunity to voice their opinions. There  
187 was a range of ages represented, with a similar distribution of men and women. Nearly all had a general  
188 practitioner and were also followed by medical specialist(s). The conditions represented in our patient  
189 group were diabetes, history of myocardial infarction and elevated cholesterol level; none reported a  
190 history of stroke, chronic kidney disease, or peripheral arterial disease.

191  
192 **Table 1b.** Descriptive statistics for patient participants (n = 13).

| Patient characteristics                              | Total (%) |
|------------------------------------------------------|-----------|
| Age (years)                                          |           |
| < 40                                                 | 2 (15)    |
| 40 - 60                                              | 5 (39)    |
| > 60                                                 | 6 (46)    |
| Gender                                               |           |
| Men                                                  | 6 (46)    |
| Women                                                | 7 (54)    |
| Chronic condition qualifying as “high CVD risk”      |           |
| None/High cholesterol only                           | 3 (23)    |
| Diabetes only                                        | 6 (46)    |
| Myocardial infarct (MI) only                         | 1 (8)     |
| Diabetes & MI                                        | 3 (23)    |
| Has a primary care provider                          |           |
| Yes                                                  | 12 (92)   |
| No                                                   | 1 (8)     |
| Followed by a medical specialist                     |           |
| Yes                                                  | 10 (77)   |
| No                                                   | 3 (23)    |
| Self-reported awareness of high cholesterol levels   |           |
| Yes                                                  | 11 (85)   |
| No                                                   | 2 (15)    |
| Current use of statin medication                     |           |
| Yes                                                  | 6 (46)    |
| If not, had spoken with physicians about statins     | 3 (23)    |
| If not, had not spoken with physicians about statins | 4 (31)    |

\*Note one participant did not complete a demographic questionnaire

193  
194  
195 **General suggestions for potential interventions**

196  
197 Several themes arose regarding interventions to improve statin use during the unprompted portion of  
198 the interviews (Table 2). General practitioner participants described that statin use may be improved by:  
199 (1) enhancing aspects of physician education to promote appropriate statin prescribing; and, (2)  
200 implementation of support tools to help physicians in decision-making and identification of patients for  
201 whom statins are indicated. In addition, patients suggested that having access to their own laboratory  
202 results may enable them to be more effective self-advocates.

203

**Table 2.** General suggestions by general practitioners and patients to increase statin use

|           |                                       |                                                                                                                                                                                                                                                                                                                                                                                                                                                                                                                                                                                                                                                                                                                                                                                                                                                                              |
|-----------|---------------------------------------|------------------------------------------------------------------------------------------------------------------------------------------------------------------------------------------------------------------------------------------------------------------------------------------------------------------------------------------------------------------------------------------------------------------------------------------------------------------------------------------------------------------------------------------------------------------------------------------------------------------------------------------------------------------------------------------------------------------------------------------------------------------------------------------------------------------------------------------------------------------------------|
| Providers | Treatment of specific Sub-populations | <p>Patients with chronic kidney disease:<br/> <i>"I struggle with the GFRs [glomerular filtration rate] – knowing when it would be safe, when it wouldn't be safe. I do get confused as to the dosing based on GFR.</i></p> <p>Patients who previously experienced side effects with statin(s):<br/> <i>"I have one strategy but if somebody is still like 'no, it's completely not tolerable for me' then I don't know what the next step is after that."</i></p> <p>Elderly patients:<br/> <i>"...getting some better understanding about the elderly. Are there any contraindications to starting on statin therapy? Is there one statin that may be more beneficial than another?"</i></p> <p>Patients with hypertriglyceridemia:<br/> <i>"I always find it hard to know what to do with triglycerides... more education around how to manage those [patients]."</i></p> |
|           | Treatment to Targets                  | <p><i>"Most people in my office are confused about what we are doing in terms of treating to the target of 2 mmol/L, because the cardiologist is still sending consults about that, but then we have these family medicine evidence-based groups saying that targets don't matter".</i></p> <p><i>"I know the TOP [Towards Optimized Practice] guidelines don't necessarily correlate with CCS [Canadian Cardiovascular Society] guidelines, so there are several schools of thought"</i></p> <p><i>"There's no real way to unify the guidelines, but to have an education session on why they're different and how to approach it so maybe you'll break down patient populations that fit better with one guideline versus another".</i></p>                                                                                                                                |
|           | Preferred modality of Education       | <i>"we have a lot of drug reps [representatives] coming to town, so it would be great to have more [education] that was not pharma, absolutely".</i>                                                                                                                                                                                                                                                                                                                                                                                                                                                                                                                                                                                                                                                                                                                         |
|           | EMR-based tools                       | <i>"One thing that would be helpful for me is if there was some automatic flag that came when I saw a patient that would alert to the fact that their treatment is not optimized for their conditions".</i>                                                                                                                                                                                                                                                                                                                                                                                                                                                                                                                                                                                                                                                                  |
| Patients  | Laboratory Results                    | <p><i>"I would like to get a copy, in addition to the doctor. I can do with it what I want"</i></p> <p><i>"It gets you questioning things so that you can come back to your doctor and say 'I saw these numbers, what does that mean? What do I need to do?'"</i></p>                                                                                                                                                                                                                                                                                                                                                                                                                                                                                                                                                                                                        |
|           | Enhanced education                    | <i>"What if somebody was going regularly to a lab, and a clinician sort of goes: 'How are you doing on this?'"</i>                                                                                                                                                                                                                                                                                                                                                                                                                                                                                                                                                                                                                                                                                                                                                           |

1  
2  
3 204 EMR: electronic medical record  
4  
5  
6  
7  
8  
9  
10  
11  
12  
13  
14  
15  
16  
17  
18  
19  
20  
21  
22  
23  
24  
25  
26  
27  
28  
29  
30  
31  
32  
33  
34  
35  
36  
37  
38  
39  
40  
41  
42  
43  
44  
45  
46  
47  
48  
49  
50  
51  
52  
53  
54  
55  
56  
57  
58  
59  
60

For peer review only

205

### 1) General practitioner *education*:

207

208 Nearly all GPs highlighted that there are general areas of knowledge that could be bolstered in order to  
209 enhance statin use. One of the main content areas in which they sought enhanced education related to  
210 the treatment of specific patient sub-populations, in particular those with chronic kidney disease, prior  
211 statin side effects, elderly patients, and those with other concurrent lipid disorders (i.e.  
212 hypertriglyceridemia).

213

214 Whether providers should be treating patients to a specific cholesterol level was a major source of  
215 confusion. They frequently referenced receiving conflicting advice, including a contradiction in clinical  
216 practice guidelines(31), some of which advocate for a 'fire and forget' approach(5, 32), while  
217 Canadian(4) and European(33) specialist guidelines recommend a 'treat-to-target' approach(4).

218

219 Regarding the modality of education sessions, most preferred in-person education sessions delivered at  
220 their clinics and delivered by someone who did not have clear conflicts of interest with pharmaceutical  
221 companies. Many GPs also suggested the use of handouts, tools or algorithms to simplify their decision-  
222 making process.

223

### 2) General practitioner *tools*

225

226 In addition to education, several GPs suggested that the use of automated tools would facilitate their  
227 prescribing of statins. Most felt that they would benefit from optimizing the use of their electronic  
228 medical records (EMR) to 'flag' individuals who were at high cardiovascular risk or had elevated  
229 cholesterol levels. Other GPs spoke of wishing for a 'running list' of eligible patients, while some  
230 mentioned using an employee or contractor designated as a panel manager to perform these tasks.

231

### 3) *Patient results and information*

233

234 Many patients independently indicated that they would like to have access to their lipid test results,  
235 without needing to rely on this being conveyed to them by their general practitioner. Some patients also  
236 suggested that providing them with their own results might reduce the frequency of unnecessary follow-  
237 up visits; and as a result, alleviate related financial burden on the healthcare system. Doing so was also  
238 thought to help foster patient engagement with their GP. Patients also felt that having greater access to  
239 information about cholesterol and treatment might facilitate more patients being on statin therapy.  
240 Suggestions were made to deliver this through enhanced patient-facing materials (i.e. brochures), as  
241 well as pharmacists or lab technicians who were able to discuss results and treatment options.

242

## **Feedback on the proposed facilitated relay intervention**

244

245 After briefing participants on the principles and practices of facilitated relay and showing them our  
246 preliminary documents for the intervention, we asked for feedback. Emerging themes were organized  
247 into four major categories: (1) general feedback and impression; (2) suggested changes; (3) intervention  
248 details; and, (4) workflow processing considerations.

249

### 1) *General feedback and impression*

250

251

1  
2  
3 252 General practitioners responded with strongly positive feedback (Table 3), which included that they  
4 253 found the information to be helpful and direct. They generally felt that the letter was written in a clear  
5 254 fashion and with a respectful tone. Several mentioned that the information provided them with  
6 255 reassurance and credibility in making recommendations to their patients.  
7 256

8 257 GPs also voiced some questions and potential concerns after hearing about our proposed intervention.  
9 258 These concerns included whether the introduction of a facilitated relay intervention might increase their  
10 259 workload, lead to possible disclosure to patients of new diagnoses of conditions that qualified them as  
11 260 high risk (i.e. diabetes), and pose a threat to their therapeutic relationships with patients. In addition,  
12 261 logistical issues around how the letter will be best delivered to ordering providers and patients were  
13 262 raised as concerns.  
14 263

15 264 Patients generally felt that bringing their facilitated relay letter to a scheduled appointment would be  
16 265 positive in their relationship by providing structure to the follow-up encounter, holding GPs to account,  
17 266 and enhancing patient-provider communication. Even though most were generally positive, some  
18 267 patients expressed concern about the facilitated relay intervention, including the possibility for privacy  
19 268 breaches and increasing patient anxieties.  
20 269

## 21 270 2) Suggested information to remove or add 22 271

23 272 We asked GPs specifically what they would like to see changed in the preliminary materials shown.  
24 273 Almost unanimously, they suggested that the letter would be more appreciated if it were shortened to  
25 274 fit on one page. Several participants suggested removing the references, mention of clinical studies, and  
26 275 guideline citations to make it more reader-friendly. There was also a preference voiced for revising the  
27 276 introductory paragraphs to have direct relevance to individual patient(s):  
28 277

29 278 *“I’m going to read it for sure, but then when you start to read it, people might put it down and say*  
30 279 *‘oh this is a study intervention’, [but] if you have the first thing at the very top: ‘you know this person*  
31 280 *has been identified as being at risk’ – then it’s about the patient rather than being about the*  
32 281 *studies”.*  
33 282

34 283 A few GPs voiced opinions that specific additions could be made to improve the letter’s utility. These  
35 284 suggestions included adding: information about health behavior change (*“the whole picture, as opposed*  
36 285 *to just medication”*); adding contact information for a specialist; and details about how/why a particular  
37 286 individual was flagged as eligible for the facilitated relay intervention: *“It would be helpful if I got a*  
38 287 *name, condition and then the statin-indicated condition, and where the condition was pulled from”.*  
39 288

40 289 Patient feedback was notable for also suggesting that the intervention provide contact information, in  
41 290 case they have further questions about interpreting their results:  
42 291

43 292 *“back that up with a helpline for somebody that doesn’t know what the [results] mean”.* Similar to  
44 293 physicians, patients expressed a strong preference for brevity: *“If I have to go through 14 pages of*  
45 294 *information to figure out what that means, I’m sorry, I don’t have time for that”.*  
46 295

47 296 However, numerous patients also stressed the importance of not only providing results or diagnoses,  
48 297 but also giving some basic education and an action plan to follow.  
49 298

## 50 299 3) Intervention details 51 300

1  
2  
3 300  
4 301 In addition to general feedback, we also explicitly asked GPs whether they would prefer to receive  
5 302 information about their patient in the form of facilitated relay (individual letter for each patient  
6 303 identified) or 'audit and feedback' (summary report including a group of their patient panel). A summary  
7 304 list or report (audit and feedback) was preferred by roughly 2/3 of the general practitioners interviewed.  
8 305 Regarding receiving letters for each patient, participants stated:

9 306  
10 307 *"this is going to get tiresome very quickly"*

11 308  
12 309 *"Am I going to get this letter 20 times? I'm probably just going to read it once";*

13 310  
14 311 *"[a list would] decrease paper burden, decrease the chance of it getting misplaced".*

15 312  
16 313 While the 'audit and feedback' approach was more popular, some GPs were clearly in favor of facilitated  
17 314 relay: *"I can't even think of the amount of work it would take to do it patient-specific. I'd love it. Sure go*  
18 315 *for it, if you have the means to do it, then why not?"*

19 316  
20 317 We also asked pointedly about how providers would feel about receiving a follow-up reminder from the  
21 318 study team, if patients' had not filled the prescription as recommended in the initial letter. The response  
22 319 was split with roughly half of the general practitioners stating that a reminder would not be necessary.

23 320  
24 321 Those who felt a reminder would be acceptable generally agreed that a 6 month window should be  
25 322 sufficient to ascertain whether or not the patient would have started on therapy: *"There are people that*  
26 323 *have a three-month wait list time, you may have to pick an interval more like six-months to appeal to the*  
27 324 *masses...".*

28 325  
29 326 Most patients felt that they would benefit from receiving a follow-up reminder. After considerable  
30 327 discussion amongst the groups, consensus was achieved that follow-up should not happen prior to four  
31 328 months, and possibly even as long as six months after the initial contact. One participant stated: *"close*  
32 329 *enough that I vaguely remember that I meant to do something with that, but not a few weeks later, [so]*  
33 330 *it's not irritating".*

34 331  
35 332 We also asked patients if they had a preference for who had signed the letter. Most felt that having  
36 333 letters come from a local specialist in cardiology or endocrinology would be preferable to having them  
37 334 signed by another GP.

#### 38 335 39 336 *4) Workflow processing considerations (General practitioners only)*

40 337  
41 338 To each GP we asked specific details about how our intervention letter would be received in their offices  
42 339 and what would happen upon receipt. The majority stated that such a letter would be opened and  
43 340 processed by their front-desk staff. One participant clarified that the information on the envelope would  
44 341 determine who opened it: *"if it's addressed to me then it will come to me, if it has a patient name for*  
45 342 *me, then it goes through our document people [who file it]"*.

46 343  
47 344 Once the letter has been opened, different offices employed a variety of different processes. In many  
48 345 practices, it would be given directly to the GP; while in others it would be scanned directly into a  
49 346 patient's file in an electronic medical record, yet in others, the hardcopy would be filed in a patient's  
50 347 chart.

348  
349 In terms of the preferred delivery modality, most GPs felt that electronic delivery directly via the EMR  
350 platform would be the preferred method of receiving the intervention. However, a number still felt that  
351 conventional delivery via paper mail or fax would be preferable. Even those who expressed a preference  
352 for conventional delivery, many elaborated that such letters would often be scanned into a patient's  
353 electronic file: "if it was to come by mail or fax, then they have to scan it onto the computer". A few GPs  
354 described systems which can do this process automatically: "our office works with a new web system, so  
355 everything that comes in via the fax actually goes directly into the computer and they then allocate to  
356 the patient".  
357

**Table 3.** Positive and negative feedback on facilitated relay intervention from general practitioners and patients

| General Practitioners |                                                                                                                                                                                                                                                                                        | Patients                                 |                                                                                                                                                                                                                                                          |
|-----------------------|----------------------------------------------------------------------------------------------------------------------------------------------------------------------------------------------------------------------------------------------------------------------------------------|------------------------------------------|----------------------------------------------------------------------------------------------------------------------------------------------------------------------------------------------------------------------------------------------------------|
| Positive              |                                                                                                                                                                                                                                                                                        |                                          |                                                                                                                                                                                                                                                          |
| <b>Composition</b>    | "Overall I thought it was worded quite well and was very clear"<br><br>"I think it's appropriate, it didn't take me very long to get through"                                                                                                                                          | <b>Provides structure to interaction</b> | "My doctor would be okay with that. It gives them a little checklist of things to talk about"                                                                                                                                                            |
| <b>Tone</b>           | "it's written in a way that doesn't make you feel stupid, I guess"<br><br>"it's good because [it's] not telling you to do this [start statin therapy], but telling you to have a conversation."                                                                                        | <b>Enhances communication</b>            | "I think that's good 'cause these doctors, some guys don't communicate."                                                                                                                                                                                 |
| <b>Credibility</b>    | "it gives family physicians more confidence to do those things and know the specialists are behind them in that recommendation"<br><br>"there's so much information for people to sift through... if you can get valid information that's corroborated and consistent, that's helpful" | <b>Increases doctor accountability</b>   | "I think it keeps them [doctors] honest as well. They should actually be proactive in terms of having that information already, but that's not always the case. So I don't have a problem with a patient having all their information at their disposal" |
| <b>Direct</b>         | "it's a good idea... it tells you what to do, which is great. You don't have to look up the guideline every time"<br><br>"it's just one of those extra little reminders that takes the brain power out of the work you have to do day-to-day"                                          | <b>Increases patient accountability</b>  | "If [patients] are encouraged to work with their doctor to monitor your numbers, you have a bit of control as well as the doctor... like working together"                                                                                               |
| <b>Information</b>    | "[side effects] are what people hear about in the news a lot, so it's very                                                                                                                                                                                                             | <b>Provides peace of mind</b>            | "It gives me a little peace of mind in that we've talked about all of the                                                                                                                                                                                |



|                                 |                                                                                                                                                                                                                                                                          |                                        |                                                                                                                                                                                                                                                                                                                                                                                  |
|---------------------------------|--------------------------------------------------------------------------------------------------------------------------------------------------------------------------------------------------------------------------------------------------------------------------|----------------------------------------|----------------------------------------------------------------------------------------------------------------------------------------------------------------------------------------------------------------------------------------------------------------------------------------------------------------------------------------------------------------------------------|
|                                 | <p>helpful to have some numbers around it, and strategies to address that”</p> <p>“All the suggestions that you made are excellent. I’m reading through this and I’m like ‘oh yeah, I didn’t realize this’ and ‘this is something I can do for some of my patients’”</p> |                                        | <p>things that are important and that should be covered... that we haven’t left anything out”</p>                                                                                                                                                                                                                                                                                |
| <b>Negative</b>                 |                                                                                                                                                                                                                                                                          |                                        |                                                                                                                                                                                                                                                                                                                                                                                  |
| <b>Increased workload</b>       | <p>“I would caution against anything that causes more documents or more paperwork... there’s already so much”</p>                                                                                                                                                        | <b>Privacy concerns</b>                | <p>“You know what, my doctor isn’t going to send it out to me, anyway. It’s going to go on to a receptionist, who might pass it on to somebody else in the office, so there’s no guarantee of privacy there”</p> <p>“Privacy is always an issue. I mean it’s like, the less information that’s out there about you, the better off you are, period. I don’t care what it is”</p> |
| <b>Disclosing new diagnoses</b> | <p>“my concern is that they get this information from a letter... my preference would be that it came straight to me”</p>                                                                                                                                                | <b>Difficulty interpreting results</b> | <p>“Some people might know all the numbers and everything else, I don’t. You give me a bunch of numbers, it means nothing to me. So unless the doctor explained it to me... I’d rather talk to my doctor”</p>                                                                                                                                                                    |
| <b>Therapeutic relationship</b> | <p>“If the patient gets a letter that’s like ‘you need to be on a statin’ and we already had a conversation that they didn’t need a statin. That could cause some issues in the therapeutic relationship.”</p>                                                           | <b>Provoking Anxieties</b>             | <p>“There are people who are coming down with every disease known to man, so for someone like that, that kind of information would just send them off the deep-end, right?”</p>                                                                                                                                                                                                  |
| <b>Logistical concerns</b>      | <p>“What if a person gets a check from a walk-in clinic? My concern is then is that walk-in clinic docs are just going to ignore this letter”</p> <p>“If it goes to the patient, sometimes you get lots of mail and they may just discard it”</p>                        | <b>Lack of engagement</b>              | <p>“You mentioned mail outs and things like that... have they proven to be effective, though, ‘cause how many people read them? How many people understand them? I don’t think there would be a lot of point in it, ‘cause I don’t think people pay that much attention”</p>                                                                                                     |
|                                 |                                                                                                                                                                                                                                                                          | <b>Sense of intimidation</b>           | <p>“Some will [say] ‘I can’t talk to my doctor like that’. There will be some people who might be intimidated to initiate that conversation”</p>                                                                                                                                                                                                                                 |

358

## DISCUSSION

In this study, both GPs and patients acknowledged that there is the potential to improve the prescription and use of statin therapy among those at high risk for cardiovascular disease. In unprompted questions, GPs acknowledged that there was a need for improved education on this topic, and that tools to help identify and track patients would be helpful. Patients also suggested that providing themselves with laboratory test results and information on treatment options may result in better medical care. When shown the proposed intervention, both groups were strongly supportive of the facilitated relay intervention. While there were clear benefits to the intervention, some potential downsides were raised from both GPs and patient perspectives. In general, all recipients would prefer letters to be succinct, yet contain high yield information and provide contact information where clarification could be sought.

Several strategies have been used to encourage GPs to be more engaged in ensuring that patients are started on statins appropriately(34). An educational audit and feedback intervention regarding dyslipidemia treatment in Italian primary care practices was shown to increase adherence to statins by approximately 10%(35). Improved communication and shared decision making, which are explicit goals of facilitated relay interventions, can improve patient adherence (36). While these and other studies have reviewed the clinical efficacy of quality improvement strategies (12), few have used detailed qualitative methods as we have done. One large qualitative study interviewed audit and feedback experts to generate hypotheses about the various factors that may contribute to the efficacy of such interventions(37). Others have used qualitative methods to highlight the barriers physicians face in encouraging adherence(38), but ours is unique in using such methods to design and develop an intervention to address these challenges.

The fact that participants suggested elements of our facilitated relay intervention in the unprompted portion of the interviews lends credibility and face validity to the proposed intervention. However, it is notable that while general practitioner felt they would benefit from having internal systems to monitor patients' records, none independently suggested a strategy mediated by an independent third party (such as facilitated relay or audit and feedback), as we have proposed. Investigators who wish to implement facilitated relay interventions to enhance adherence to medical therapies can use the findings of this study to help develop interventions that are more likely to be acceptable to both GPs and patients. One of the main findings is to ensure that any such information is brief and high yield, containing patient identifiers early to capture general practitioner's attention. Such interventions can be strengthened by incorporating education on controversial or little-known topics. Patients strongly preferred any correspondence to also contain direct suggestions or an action plan. Workflow and processing of these letters needs to be considered and interventions designed to be as minimally disruptive to clinical practice as possible – with most physicians preferring that it be embedded directly within the EMR; yet in healthcare settings (like ours) where there is marked heterogeneity in the use and type of EMRs, this may not be possible.

There are limitations to this study. Firstly, as in most qualitative studies, the number of participants was relatively small. This limitation is mitigated by the fact that physician interviews proceeded until the point of saturation. Patient data were not collected in this manner, and these themes may not be fully saturated and appreciate this as a limitation. Furthermore, the patient sample we recruited may not be representative of the broader population, as many of them had previously stated an interest in quality improvement and research. Secondly, given the context-dependent nature of qualitative data, the

1  
2  
3 407 applicability of these findings to other settings is not certain. Yet physicians face similar problems (i.e.  
4 408 time constraints, patient complexity and comorbidities and patient resistance to medical therapies) in  
5 409 numerous facets of medical care; therefore, it is conceivable that the findings of this study would apply  
6 410 to interactions between patients and GPs in other clinical settings. Due to time constraints of  
7 411 participants and researchers, member checking was not undertaken in this study. Finally, it is important  
8 412 to note that feedback was sought specifically about the proposed intervention. However, given the  
9 413 details reported, we feel that these findings are likely to be helpful to others proposing similar quality  
10 414 improvement interventions. One of the major strengths of this study is the depth and richness of the  
11 415 qualitative data that were collected. By asking questions in an open-ended manner, we were able to  
12 416 record detailed accounts and opinions. Another strength of this work is the fact that we also sought  
13 417 patient input into the development of this intervention, rather than relying on physician feedback alone.  
14 418

15  
16 419 Statin therapy has been demonstrated to effectively lower cholesterol and reduce the risk of  
17 420 cardiovascular events and death in individuals at high risk of cardiovascular disease. Despite this, they  
18 421 remain underused. There are patient, provider and system factors that contribute to the underuse of  
19 422 statins. Facilitated relay interventions hold promise as a potential method to address this important care  
20 423 gap. Our study sought perspectives of both healthcare providers and patients, which will be  
21 424 incorporated into intervention design to maximize acceptability. Insights gained from qualitative data  
22 425 will be used to improve the likelihood of success and achieve the desired clinical impact.  
23 426

### 24 427 **Contributions**

25  
26 428 All study team members contribute to the development of the research question. The study design was  
27 429 conceived by DJTC and SB. DJTC wrote the first draft of the study protocol. Data collection and analysis  
28 430 was completed by DJTC, RCWL and SB. All study team members contribute to the interpretation and  
29 431 contextualization of study findings. The first draft of the manuscript was written by DJTC. All study team  
30 432 members contributed substantively to further revisions of the manuscript and have consented to the  
31 433 publication of this version.  
32 434

### 33 435 **Data Sharing**

34 436 No additional data available  
35 437  
36 438  
37  
38  
39  
40  
41  
42  
43  
44  
45  
46  
47  
48  
49  
50  
51  
52  
53  
54  
55  
56  
57  
58  
59  
60

## 439 References

- 440
- 441 1. Cholesterol Treatment Trialists Collaborators. The effects of lowering LDL cholesterol with statin
- 442 therapy in people at low risk of vascular disease: meta-analysis of individual data from 27 randomised
- 443 trials. *The Lancet*. 2012;380(9841):581-90.
- 444 2. Yusuf S, Hawken S, Ôunpuu S, Dans T, Avezum A, Lanan F, et al. Effect of potentially modifiable
- 445 risk factors associated with myocardial infarction in 52 countries (the INTERHEART study): case-control
- 446 study. *The Lancet*. 2004;364(9438):937-52.
- 447 3. O'Donnell MJ, Xavier D, Liu L, Zhang H, Chin SL, Rao-Melacini P, et al. Risk factors for ischaemic
- 448 and intracerebral haemorrhagic stroke in 22 countries (the INTERSTROKE study): a case-control study.
- 449 *The Lancet*. 2010;376(9735):112-23.
- 450 4. Anderson TJ, Grégoire J, Pearson GJ, Barry AR, Couture P, Dawes M, et al. 2016 Canadian
- 451 Cardiovascular Society Guidelines for the Management of Dyslipidemia for the Prevention of
- 452 Cardiovascular Disease in the Adult. *Canadian Journal of Cardiology*. 2016;32(11):1263-82.
- 453 5. Grundy SM, Stone NJ. 2018 American Heart Association/American College of
- 454 Cardiology/Multisociety Guideline on the Management of Blood Cholesterol-Secondary Prevention.
- 455 *JAMA Cardiol*. 2019;4(6):589-91.
- 456 6. Butalia S, Lewin A, Simpson S, Dasgupta K, Khan N, Pilote L, et al. Sex-based disparities in
- 457 cardioprotective medication use in adults with diabetes. *Diabetol Metab Syndr*. 2014;5(6):117.
- 458 7. Anderson TJ, Grégoire J, Hegele RA, Couture P, Mancini GBJ, McPherson R, et al. 2012 Update of
- 459 the Canadian Cardiovascular Society Guidelines for the Diagnosis and Treatment of Dyslipidemia for the
- 460 Prevention of Cardiovascular Disease in the Adult. *Canadian Journal of Cardiology*. 2013;29(2):151-67.
- 461 8. Johansen ME, Green LA, Sen A, Kircher S, Richardson CR. Cardiovascular Risk and Statin Use in
- 462 the United States. *The Annals of Family Medicine*. 2014;12(3):215-23.
- 463 9. Gamble JM, Butalia S. Medical Practice Variations in Diabetes Mellitus. In: Johnson A, Stukel T,
- 464 editors. *Medical Practice Variations*. Health Services Research: Springer US; 2015. p. 1-40.
- 465 10. Tu JV, Chu A, Maclagan L, Austin PC, Johnston S, Ko DT, et al. Regional variations in ambulatory
- 466 care and incidence of cardiovascular events. *Canadian Medical Association Journal*. 2017;189(13):E494-
- 467 E501.
- 468 11. Worrall G, Chaulk P, Freake D. The effects of clinical practice guidelines on patient outcomes in
- 469 primary care: a systematic review. *CMAJ*. 1997;156(12):1705-12.
- 470 12. Tricco AC, Ivers NM, Grimshaw JM, Moher D, Turner L, Galipeau J, et al. Effectiveness of quality
- 471 improvement strategies on the management of diabetes: a systematic review and meta-analysis. *Lancet*.
- 472 2012;379(9833):2252-61.
- 473 13. Rash JA, Campbell DJ, Tonelli M, Campbell TS. A systematic review of interventions to improve
- 474 adherence to statin medication: What do we know about what works? *Prev Med*. 2016;90:155-69.
- 475 14. Walsh J, McDonald KM, Shojania KG, Sundaram V, Nayak S, Davies S, et al. Closing the Quality
- 476 Gap: A Critical Analysis of Quality Improvement Strategies (Vol 3: Hypertension Care). AHRQ Technical
- 477 Reviews. Rockville (MD)2005.
- 478 15. Walsh JM, McDonald KM, Shojania KG, Sundaram V, Nayak S, Lewis R, et al. Quality
- 479 improvement strategies for hypertension management: a systematic review. *Med Care*. 2006;44(7):646-
- 480 57.
- 481 16. Campbell DJ, Sargious P, Lewanczuk R, McBrien K, Tonelli M, Hemmelgarn B, et al. Use of
- 482 chronic disease management programs for diabetes: in Alberta's primary care networks. *Can Fam*
- 483 *Physician*. 2013;59(2):e86-92.
- 484 17. Michie S, van Stralen MM, West R. The behaviour change wheel: a new method for
- 485 characterising and designing behaviour change interventions. *Implement Sci*. 2011;6:42.

- 1  
2  
3 486 18. Cane J, O'Connor D, Michie S. Validation of the theoretical domains framework for use in  
4 487 behaviour change and implementation research. *Implement Sci.* 2012;7:37.
- 5 488 19. Michie S, Johnston M, Francis J, Hardeman W, Eccles M. From Theory to Intervention: Mapping  
6 489 Theoretically Derived Behavioural Determinants to Behaviour Change Techniques. *Applied Psychology.*  
7 490 2008;57(4):660-80.
- 8 491 20. Sandelowski M. Whatever happened to qualitative description? *Res Nurs Health.* 2000;23(4):7.
- 9 492 21. Pope C, van Royen P, Baker R. Qualitative methods in research on healthcare quality. *Qual Saf*  
10 493 *Health Care.* 2002;11(2):148-52.
- 11 494 22. Ayala GX, Elder JP. Qualitative methods to ensure acceptability of behavioral and social  
12 495 interventions to the target population. *J Public Health Dent.* 2011;71 Suppl 1:S69-79.
- 13 496 23. Tong A, Sainsbury P, Craig J. Consolidated criteria for reporting qualitative research (COREQ): a  
14 497 32-item checklist for interviews and focus groups. *Int J Qual Health Care.* 2007;19(6):349-57.
- 15 498 24. Santana M, Zelinsky S, Ahmed S, Doktorchik C, James M, Wilton S, et al. Working Together with  
16 499 Patients and Clinician Researchers to Improve Cardiovascular Health. 2018 SPOR Summit; Ottawa, ON.
- 17 500 25. Santana M, Zelinsky S, Ahmed S, Doktorchik C, James M, Wilton S, et al. Working Together: Co-  
18 501 designing Priorities for Patient-Oriented Cardiovascular Research by Patients, Clinicians, and  
19 502 Researchers. Canadian Association for Health Services and Policy Research (CAHSPR); Halifax, NS2019.
- 20 503 26. Guest G, Namey E, Taylor J, Eley N, McKenna K. Comparing focus groups and individual  
21 504 interviews: findings from a randomized study. *Int J Soc Res Methodol.* 2017;20(6):693-708.
- 22 505 27. Walker JL. The use of saturation in qualitative research. *Can J Cardiovasc Nurs.* 2012;22(2):37-  
23 506 46.
- 24 507 28. Hsieh HF, Shannon SE. Three approaches to qualitative content analysis. *Qual Health Res.*  
25 508 2005;15(9):1277-88.
- 26 509 29. Drew P, Jones B, Norton D. Team effectiveness in primary care networks in Alberta. *Healthc Q.*  
27 510 2010;13(3):33-8.
- 28 511 30. Manns BJ, Tonelli M, Zhang J, Campbell DJT, Sargious P, Ayyalasomayajula B, et al. Enrolment in  
29 512 primary care networks: impact on outcomes and processes of care for patients with diabetes. *Canadian*  
30 513 *Medical Association Journal.* 2012;184(2):E144-E52.
- 31 514 31. Tibrewala A, Jivan A, Oetgen WJ, Stone NJ. A Comparative Analysis of Current Lipid Treatment  
32 515 Guidelines: Nothing Stands Still. *J Am Coll Cardiol.* 2018;71(7):794-9.
- 33 516 32. Toward Optimized Practice (TOP) Cardiovascular Disease Risk Working Group. Prevention and  
34 517 management of cardiovascular disease risk in primary care clinical practice  
35  
36  
37  
38  
39  
40 518 guideline 2015 [Available from:  
41 519 <http://www.topalbertadoctors.org/download/1655/Lipid%20Pathway%20CPG.pdf>? 20150916105016.  
42 520 33. Catapano AL, Graham I, De Backer G, Wiklund O, Chapman MJ, Drexel H, et al. 2016 ESC/EAS  
43 521 Guidelines for the Management of Dyslipidaemias. *Rev Esp Cardiol (Engl Ed).* 2017;70(2):115.
- 44 522 34. Kaya H, Beton O, Yilmaz M. How to increase level of patients' awareness regarding the  
45 523 importance of statins despite the influence of the media? *International Journal of Cardiology.*  
46 524 2016;207:164.
- 47 525 35. Casula M, Tragni E, Piccinelli R, Zambon A, De Fendi L, Scotti L, et al. A simple informative  
48 526 intervention in primary care increases statin adherence. *Eur J Clin Pharmacol.* 2016;72(2):227-34.
- 49 527 36. Wilson SR, Strub P, Buist AS, Knowles SB, Lavori PW, Lapidus J, et al. Shared treatment decision  
50 528 making improves adherence and outcomes in poorly controlled asthma. *Am J Respir Crit Care Med.*  
51 529 2010;181(6):566-77.
- 52 530 37. Colquhoun HL, Carroll K, Eva KW, Grimshaw JM, Ivers N, Michie S, et al. Advancing the literature  
53 531 on designing audit and feedback interventions: identifying theory-informed hypotheses. *Implement Sci.*  
54 532 2017;12(1):117.

1  
2  
3 533 38. Kvarnström K, Airaksinen M, Liira H. Barriers and facilitators to medication adherence: a  
4 534 qualitative study with general practitioners. BMJ Open. 2018;8(1):e015332.

5  
6 535  
7 536  
8  
9  
10  
11  
12  
13  
14  
15  
16  
17  
18  
19  
20  
21  
22  
23  
24  
25  
26  
27  
28  
29  
30  
31  
32  
33  
34  
35  
36  
37  
38  
39  
40  
41  
42  
43  
44  
45  
46  
47  
48  
49  
50  
51  
52  
53  
54  
55  
56  
57  
58  
59  
60

For peer review only

## **Appendix A: Interview Guide for health care professional**

Thank you for agreeing to participate in our interview today. We wish to discuss your experience in managing dyslipidemia (or high cholesterol) in order to better understand how we might help family physicians treat dyslipidemia (or high cholesterol). We have a proposed intervention and would like your assistance in how to enrich it.

### **1. Experience managing dyslipidemia**

Please describe any challenges or difficulties that you experience in identifying and managing patients with dyslipidemia?

- Do you use any resources to guide you in the management of these patients?
  - Canadian Cardiovascular Society Guidelines
  - Diabetes Canada Guidelines
  - TOP guidelines

In addition to measuring a patient's lipids, what are some other parameters that you consider when assessing a patient for dyslipidemia, and how to optimally manage this condition?

### **2. Dyslipidemia-related practices**

In your practice, do you find it helpful to quantify a patient's LDL-cholesterol or get a lipid panel?

If yes,

- Are there certain populations in whom you find this test most helpful?
- What is your chosen method/diagnostic test to do so?
  - Fasting or random lipid profile
    - Total cholesterol
    - HDL-cholesterol
    - LDL-cholesterol
  - ApoB
- How does this information change your clinical practice?
- How often do you repeat cholesterol testing for patients with with conditions that puts them at high risk for cardiovascular disease (i.e. previous clinical cardiovascular disease, diabetes, chronic kidney disease)?

If no,

- Why is it not particularly helpful?
  - Don't know which test to do
  - Don't know how to order it
  - Don't know in whom it is indicated

- Don't know what to do with the results

In thinking about your practice, what proportion of your patients with conditions that put them at high risk for cardiovascular disease (i.e. previous myocardial infarction, stroke, diabetes, and/or chronic kidney disease) have had their lipid profile assessed in the past 12 months?

What are some of the reasons this does not happen (in your practice and in others')?

- Didn't think it was indicated/for whom it is indicated
- Too many things to attend to
- Not perceived to be an important issue amongst all other disease/conditions that FPs manage
- Patient factors (doesn't go for test)

### 3. Intervention

If we wanted to increase the use of statins among people at high risk for cardiovascular disease (i.e. previous clinical cardiovascular disease, diabetes, chronic kidney disease), what might be done? What tools, resources, prompts may help facilitate increased treatment of dyslipidemia?

In your opinion, what type of educational intervention is most effective in disseminating clinical practice guidelines to family physicians? (i.e. conferences, local lectures, treatment recommendations on lab results).

We are considering the use of a facilitated relay strategy, where patient's information from Calgary Laboratory Services is used to identify those who have indications for statin therapy. Those who are not currently filling statin prescriptions at the pharmacy would receive a letter from the lab indicating that they may benefit from statins. They will be encouraged to bring this letter in to discuss this with you.

How would family physicians respond to receiving a letter from the lab prompting them to consider starting their patient on statin treatment?

- What would be the characteristics of such a letter that would make it more likely to succeed?
  - Short/Pictorial/Colorful

Would it be more helpful to have this information specific about one named patient, or rather have an audit of your entire practice that would indicate what proportion of eligible patients with statin-indicated conditions are currently being treated with statins? (i.e. Audit and Feedback)



1  
2  
3 How should such an intervention either on a specific patient or about your entire practice  
4 be received?  
5

- 6 • Mail/Fax/EMR/combo

7  
8  
9 How would such an intervention be processed in your office?

- 10 • Who would open the envelope?
- 11 • What would they do with it? (give it to you, put it in the patient's chart)
- 12 • How likely would you be to see this information?

13  
14  
15  
16 Who should this letter be coming from in order to have it received in the most positive  
17 way possible?  
18

- 19 • A non-clinical academic researcher (Dr. XXXX)
- 20 • Head of the Calgary Laboratory Services (Dr. Christopher Naugler)
- 21 • A lipid specialist (Dr. Sonia Butalia, Alex Leung)
- 22 • An academic family doctor (Dr. Kerry McBrien)
- 23 • A respected community family doctor
- 24 • The lead of Dyslipidemia Guidelines (Dr. Todd Anderson)
- 25 • Dr. Cello Tonelli, Associate Vice-President (Research) at the University of  
26 Calgary
- 27 • Dr. Richard Lewanczuk, Senior Medical Director for Primary Care, Chronic  
28 Disease Management, Community and Rural for Alberta Health Services
- 29 • Someone else

30  
31  
32  
33  
34  
35 Would it be helpful to receive a reminder or follow-up letter?

- 36 • How much later should this be sent, so as to be useful and not annoying?

37  
38  
39 If the intervention provided you with patient-oriented material about this subject, and  
40 asked you to share it with your patients, how would you feel about doing so?

- 41 • What content should be included in this patient-oriented material to enhance statin  
42 use?
- 43 • What format should this material be in? Electronic, hard-copy? How should it be  
44 delivered? Mail, email?
- 45 • Would you share it in a clinical setting?
- 46 • Would you be willing to mail it to patients directly?

47  
48  
49  
50  
51 Do you have any additional comments or suggestions for developing an intervention to  
52 increase the use statins in people at high risk for cardiovascular disease (i.e. previous  
53 clinical cardiovascular disease, diabetes, chronic kidney disease) in primary care?  
54  
55  
56  
57  
58  
59

1  
2  
3 Thank you for participating in today's interview. Using the information you provided, we  
4 will work on developing an intervention to improve the treatment of dyslipidemia in  
5 patients who are at high risk for cardiovascular disease (i.e. previous clinical  
6 cardiovascular disease, diabetes, chronic kidney disease)?  
7  
8

### 9 **Appendix B: Focus Group Guide for patients**

10 Thank you for agreeing to participate in our focus group today. There are many risk  
11 factors for heart attacks and stroke. Today we want to focus on one risk factor being high  
12 cholesterol. High cholesterol is a major risk factor for heart attacks, strokes and  
13 circulatory problems. There are no symptoms of high cholesterol and it is diagnosed by a  
14 lab test that your doctor would order. Importantly, we work for the University of Calgary  
15 and have no relationship with any medication companies.  
16  
17

18 We wish to discuss your experience in managing *cholesterol* with medications in order to  
19 better understand how we might help family physicians (*doctors*) treat high cholesterol.  
20  
21

#### 22 **1. Experience with high cholesterol**

23 Think about the last time your doctor has sent you for a cholesterol test. Did your doctor  
24 talk to you about the results? Treatment? What kind of treatment was discussed (diet,  
25 exercise, a medication)?  
26  
27

28 Put yourself in the position of being told that you need to take a medication for your  
29 cholesterol. What factors would make you more likely to take it? What factors would  
30 make you not want to take it? Reasons, side effects, costs  
31  
32

- 33 • Would you use any resources to help you decide?
  - 34 ○ Doctor
  - 35 ○ Dietician
  - 36 ○ Internet
  - 37 ○ Family, friends
  - 38
  - 39

40 What would you think if your doctor told you that your cholesterol wasn't all that high,  
41 but because of your other health conditions she wanted to start you on a cholesterol  
42 lowering medication to reduce your risk of heart attack and stroke?  
43  
44

45 Do you think it would be helpful to get the actual result of your cholesterol level sent  
46 directly from the lab to you?  
47  
48

49  
50 Currently, cancer screening programs send letters to patients about their results and next  
51 steps. What are your thoughts for something similar for high cholesterol?  
52  
53  
54  
55  
56  
57  
58  
59  
60

1  
2  
3 What about information about recommended treatments and potential side effects?  
4 Would you find this to be invasive of your privacy (i.e. info from the lab about treatment  
5 and not your doctor)?  
6  
7  
8

9 How would you feel about taking a letter with these recommendations to your doctor to  
10 discuss about a medication for high cholesterol?  
11  
12  
13

14 How do you feel your doctor would respond to you bringing this information?  
15  
16  
17

18 What things on the letter would make it helpful?  
19

20 -length, colour, graphics,  
21  
22  
23

24 Who should this letter be coming from in order to have it received in the most positive  
25 way possible?  
26

- 27
- 28 • A non-clinical academic researcher (Dr. XXXX)
- 29 • Head of the Calgary Laboratory Services (Dr. Christopher Naugler)
- 30 • A lipid specialist (Dr. Sonia Butalia, Alex Leung)
- 31 • An academic family doctor (Dr. Kerry McBrien)
- 32 • A respected community family doctor
- 33 • The lead of Dyslipidemia Guidelines (Dr. Todd Anderson)
- 34 • Dr. Richard Lewanczuk, Senior Medical Director for Primary Care, Chronic  
35 Disease Management, Community and Rural for Alberta Health Services
- 36 • Someone else  
37  
38  
39

40  
41 Would it be helpful to receive a reminder or follow-up letter?  
42

- 43 • How much later should this be sent, so as to be useful and not annoying?  
44

45 Do you have any additional comments or suggestions for developing an way to increase  
46 the use the treatment of people with high cholesterol?  
47  
48  
49  
50  
51  
52  
53  
54  
55  
56  
57  
58  
59  
60

## Appendix C: Facilitated Relay Letter

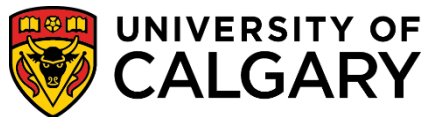

Date: XXXX-XX-XX

Dear Dr. [Physician Last Name],

RE: [Patient Name]

As you may recall, your Primary Care Network is involved in a study with the University of Calgary. This is an investigator-initiated study with public funding from the [*Canadian Institutes of Health Research*].

Dyslipidemia is a major risk factor for myocardial infarction and stroke<sup>1-2</sup>. As you know, in patients like [name], statins are indicated for their dyslipidemia because they are proven to reduce cardiovascular outcomes and mortality<sup>3-4</sup>. Because of numerous randomized controlled trials, guidelines recommend statin use in individuals with history of previous cardiovascular disease, diabetes, or chronic renal failure<sup>5</sup>.

We are writing to you to consider initiating a statin in your patient. We know the importance of the therapeutic relationship that you have with your patients and know that we do not know your patient like you do. The purpose of this letter is to assist in you in your discussion with [name], about using a statin medication.

[Name] may not be taking a statin because of underestimation of their personal risk of cardiovascular disease, fear of side-effects, previous side-effects, or cost. If cost is a concern, compassionate programs are available for several statin medications. Please kindly call our study telephone number to assist in facilitating this.

The most common side effect from statins is muscle aches, and the frequency of statin-induced rhabdomyolysis is very rare (i.e. < 1 in 10,000 patients per year on statins)<sup>6</sup>. Studies suggest that there are several proven methods for managing people who have experienced muscle aches. For those unable to tolerate daily high intensity statins, some statin is still better than none, and the following strategies can be considered:

1. *Reducing the dose of statin.* i.e. Atorvastatin 10-20mg or Rosuvastatin 2.5-5mg<sup>7</sup>.
2. *Trying a low potency statin medication.* Lower potency statins seem to be less strongly associated with muscle aches. Fluvastatin and Pravastatin were much less likely than Simvastatin and Atorvastatin to cause myalgia<sup>8</sup>. For your reference, maximum doses of these low potency statins, and their equivalencies are:

1  
2 Pravastatin 80mg = Atorvastatin 20mg = Rosuvastatin 10mg  
3 Fluvastatin XL 80mg = Atorvastatin 10mg = Rosuvastatin 5mg  
4

- 5  
6 3. *Reducing dose or lengthening administration interval.* Studies have demonstrated that  
7 greater than 70% of patients affected by myalgias were able to tolerate every other day  
8 administration with no recurrence of muscle symptoms<sup>9</sup>.  
9

10 There is a small chance that your patient may have been misclassified with a statin indicated  
11 condition. We sincerely apologize for this and would be most appreciative if you can call or fax us to  
12 let us know.  
13

14  
15 We welcome any questions or comments so please kindly contact us at 403-955-8327 (or fax 403-955-  
16 8249), for more information.  
17

18  
19 Sincerely,  
20 Sonia Butalia MD, FRCPC, MSc and the study team  
21  
22  
23  
24  
25  
26  
27  
28  
29  
30  
31

## 32 References

- 33  
34  
35 1. Yusuf S, Hawken S, Ôunpuu S, et al. *The Lancet*. 2004;364(9438):937-952.  
36 2. O'Donnell MJ, Xavier D, Liu L, et al. *The Lancet*. 2010;376(9735):112-123.  
37 3. Cholesterol Treatment Trialists Collaboration. *The Lancet*. 2010;376(9753):1670-1681.  
38 4. Cholesterol Treatment Trialists Collaborators. *The Lancet*. 2012;380(9841):581-590.  
39 5. Anderson TJ, Grégoire J, Pearson GJ, et al. 2016 Canadian Cardiovascular Society Guidelines  
40 for the Management of Dyslipidemia for the Prevention of Cardiovascular Disease in the Adult.  
41 *Canadian Journal of Cardiology*. 2016;32(11):1263-1282.  
42 6. Graham DJ, Staffa JA, Shatin D, et al. *JAMA*. 2004;292(21):2585-2590.  
43 7. Arca M, Pigna G. *Diabetes, Metabolic Syndrome and Obesity: Targets and Therapy*. 2011;4:155-  
44 166.  
45 8. Bruckert E, Hayem G, Dejager S, Yau C, Bégaud B. *Cardiovascular Drugs and Therapy*.  
46 December 01 2005;19(6):403-414.  
47 9. Belloc S, Paoletti R, Corsini A. *Circulation*. June 15, 2004 2004;109(23 suppl 1):III-50-III-57.  
48  
49  
50  
51  
52  
53  
54  
55  
56  
57  
58  
59  
60

**Strategies for Enhancing Cholesterol Lowering Medication Use  
Among Patients at High Cardiovascular Disease Risk: Patient and  
General Practitioners' Perspectives on a Facilitated Relay  
Intervention**

Consolidated criteria for reporting qualitative studies (COREQ): 32-item checklist

| No | Item                                                       | Guide questions/<br>description                             | Response           |
|----|------------------------------------------------------------|-------------------------------------------------------------|--------------------|
|    | <b>Domain 1:<br/>Research<br/>team and<br/>reflexivity</b> |                                                             |                    |
|    | Personal<br>Characteristics                                |                                                             |                    |
| 1. | Interviewer/facilitator                                    | Which author/s conducted the interview or focus group?      | Line 137           |
| 2. | Credentials                                                | What were the researcher's credentials? <i>E.g. PhD, MD</i> | Author information |
| 3. | Occupation                                                 | What was their occupation at the time of the study?         | Line 137           |
| 4. | Gender                                                     | Was the researcher male or female?                          | Line 137           |
| 5. | Experience and training                                    | What experience or training did the researcher have?        | Line 137           |

| No                                | Item                                     | Guide questions/<br>description                                                                                                                                 | Response                          |
|-----------------------------------|------------------------------------------|-----------------------------------------------------------------------------------------------------------------------------------------------------------------|-----------------------------------|
|                                   | Relationship with participants           |                                                                                                                                                                 |                                   |
| 6.                                | Relationship established                 | Was a relationship established prior to study commencement?                                                                                                     | Line 138-139                      |
| 7.                                | Participant knowledge of the interviewer | What did the participants know about the researcher? <i>e.g. personal goals, reasons for doing the research</i>                                                 | Not discussed                     |
| 8.                                | Interviewer characteristics              | What characteristics were reported about the interviewer/facilitator? <i>e.g. Bias, assumptions, reasons and interests in the research topic</i>                | Not discussed                     |
| <b>Domain 2:<br/>study design</b> |                                          |                                                                                                                                                                 |                                   |
|                                   | Theoretical framework                    |                                                                                                                                                                 |                                   |
| 9.                                | Methodological orientation and Theory    | What methodological orientation was stated to underpin the study? <i>e.g. grounded theory, discourse analysis, ethnography, phenomenology, content analysis</i> | Qualitative Description – Line 98 |

| No  | Item                         | Guide questions/<br>description                                                           | Response                                                          |
|-----|------------------------------|-------------------------------------------------------------------------------------------|-------------------------------------------------------------------|
|     | Participant selection        |                                                                                           |                                                                   |
| 10. | Sampling                     | How were participants selected? <i>e.g. purposive, convenience, consecutive, snowball</i> | GP – Snowball (line 106-107)<br>Patients – Convenience (line 116) |
| 11. | Method of approach           | How were participants approached? <i>e.g. face-to-face, telephone, mail, email</i>        | Line 106-120                                                      |
| 12. | Sample size                  | How many participants were in the study?                                                  | Line 173<br>Line 186                                              |
| 13. | Non-participation            | How many people refused to participate or dropped out? Reasons?                           | Line 176-177                                                      |
|     | Setting                      |                                                                                           |                                                                   |
| 14. | Setting of data collection   | Where was the data collected? <i>e.g. home, clinic, workplace</i>                         | Line 137<br>Line 142                                              |
| 15. | Presence of non-participants | Was anyone else present besides the participants and researchers?                         | Line 143                                                          |
| 16. | Description of sample        | What are the important characteristics of the sample? <i>e.g. demographic data, date</i>  | Line 174-195                                                      |



| No                                         | Item                   | Guide questions/<br>description                                               | Response                       |
|--------------------------------------------|------------------------|-------------------------------------------------------------------------------|--------------------------------|
|                                            | Data collection        |                                                                               |                                |
| 17.                                        | Interview guide        | Were questions, prompts, guides provided by the authors? Was it pilot tested? | Appendix A& B                  |
| 18.                                        | Repeat interviews      | Were repeat interviews carried out? If yes, how many?                         | No                             |
| 19.                                        | Audio/visual recording | Did the research use audio or visual recording to collect the data?           | Line 146                       |
| 20.                                        | Field notes            | Were field notes made during and/or after the interview or focus group?       | Line 143-144                   |
| 21.                                        | Duration               | What was the duration of the interviews or focus group?                       | Line 142-143                   |
| 22.                                        | Data saturation        | Was data saturation discussed?                                                | Line 140 + limitations section |
| 23.                                        | Transcripts returned   | Were transcripts returned to participants for comment and/or correction?      | No                             |
| <b>Domain 3:<br/>analysis and findings</b> |                        |                                                                               |                                |

| No            | Item                           | Guide questions/<br>description                                                                                                          | Response                 |
|---------------|--------------------------------|------------------------------------------------------------------------------------------------------------------------------------------|--------------------------|
| Data analysis |                                |                                                                                                                                          |                          |
| 24.           | Number of data coders          | How many data coders coded the data?                                                                                                     | Line 156-160             |
| 25.           | Description of the coding tree | Did authors provide a description of the coding tree?                                                                                    | Line 157                 |
| 26.           | Derivation of themes           | Were themes identified in advance or derived from the data?                                                                              | Line 157-158 (inductive) |
| 27.           | Software                       | What software, if applicable, was used to manage the data?                                                                               | Line 164-165             |
| 28.           | Participant checking           | Did participants provide feedback on the findings?                                                                                       | Line 414-415             |
| Reporting     |                                |                                                                                                                                          |                          |
| 29.           | Quotations presented           | Were participant quotations presented to illustrate the themes / findings? Was each quotation identified? e.g. <i>participant number</i> | In-text and Table 3      |
| 30.           | Data and findings consistent   | Was there consistency between the data presented and the findings?                                                                       | Yes                      |

| No  | Item                    | Guide questions/<br>description                                        | Response        |
|-----|-------------------------|------------------------------------------------------------------------|-----------------|
| 31. | Clarity of major themes | Were major themes clearly presented in the findings?                   | Results section |
| 32. | Clarity of minor themes | Is there a description of diverse cases or discussion of minor themes? | Table 2 & 3     |

# BMJ Open

## Strategies for Enhancing the Initiation of Cholesterol Lowering Medication Among Patients at High Cardiovascular Disease Risk: A Qualitative Descriptive Exploration of Patient and General Practitioners' Perspectives on a Facilitated Relay Intervention in Alberta, Canada

|                                 |                                                                                                                                                                                                                                                                                                                                                                                                                                                                                                                                                                                                                                                                                                                                                                                                                           |
|---------------------------------|---------------------------------------------------------------------------------------------------------------------------------------------------------------------------------------------------------------------------------------------------------------------------------------------------------------------------------------------------------------------------------------------------------------------------------------------------------------------------------------------------------------------------------------------------------------------------------------------------------------------------------------------------------------------------------------------------------------------------------------------------------------------------------------------------------------------------|
| Journal:                        | <i>BMJ Open</i>                                                                                                                                                                                                                                                                                                                                                                                                                                                                                                                                                                                                                                                                                                                                                                                                           |
| Manuscript ID                   | bmjopen-2020-038469.R1                                                                                                                                                                                                                                                                                                                                                                                                                                                                                                                                                                                                                                                                                                                                                                                                    |
| Article Type:                   | Original research                                                                                                                                                                                                                                                                                                                                                                                                                                                                                                                                                                                                                                                                                                                                                                                                         |
| Date Submitted by the Author:   | 19-Sep-2020                                                                                                                                                                                                                                                                                                                                                                                                                                                                                                                                                                                                                                                                                                                                                                                                               |
| Complete List of Authors:       | Campbell, David; University of Calgary Cumming School of Medicine, Department of Medicine<br>Lee, Rachelle; University of Ottawa<br>McBrien, Kerry; University of Calgary, Family Medicine<br>Anderson, Todd; University of Calgary Cumming School of Medicine, Department of Cardiac Sciences<br>Quan, Hude; University of Calgary, Community Health Sciences<br>Leung, Alexander; University of Calgary Cumming School of Medicine, Department of Medicine<br>Chen, Guanmin; University of Calgary Cumming School of Medicine, Community Health Sciences<br>Lu, Mingshan ; University of Calgary, Economics<br>Naugler, Christopher; University of Calgary, Pathology and Laboratory Medicine; Calgary Laboratory Services,<br>Butalia, Sonia; University of Calgary Cumming School of Medicine, Department of Medicine |
| <b>Primary Subject Heading</b>: | Cardiovascular medicine                                                                                                                                                                                                                                                                                                                                                                                                                                                                                                                                                                                                                                                                                                                                                                                                   |
| Secondary Subject Heading:      | Diabetes and endocrinology, General practice / Family practice, Health services research, Qualitative research, Renal medicine                                                                                                                                                                                                                                                                                                                                                                                                                                                                                                                                                                                                                                                                                            |
| Keywords:                       | QUALITATIVE RESEARCH, GENERAL MEDICINE (see Internal Medicine), Quality in health care < HEALTH SERVICES ADMINISTRATION & MANAGEMENT, Cardiology < INTERNAL MEDICINE, PREVENTIVE MEDICINE                                                                                                                                                                                                                                                                                                                                                                                                                                                                                                                                                                                                                                 |
|                                 |                                                                                                                                                                                                                                                                                                                                                                                                                                                                                                                                                                                                                                                                                                                                                                                                                           |

SCHOLARONE™  
Manuscripts

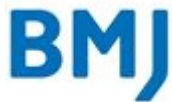

I, the Submitting Author has the right to grant and does grant on behalf of all authors of the Work (as defined in the below author licence), an exclusive licence and/or a non-exclusive licence for contributions from authors who are: i) UK Crown employees; ii) where BMJ has agreed a CC-BY licence shall apply, and/or iii) in accordance with the terms applicable for US Federal Government officers or employees acting as part of their official duties; on a worldwide, perpetual, irrevocable, royalty-free basis to BMJ Publishing Group Ltd ("BMJ") its licensees and where the relevant Journal is co-owned by BMJ to the co-owners of the Journal, to publish the Work in this journal and any other BMJ products and to exploit all rights, as set out in our [licence](#).

The Submitting Author accepts and understands that any supply made under these terms is made by BMJ to the Submitting Author unless you are acting as an employee on behalf of your employer or a postgraduate student of an affiliated institution which is paying any applicable article publishing charge ("APC") for Open Access articles. Where the Submitting Author wishes to make the Work available on an Open Access basis (and intends to pay the relevant APC), the terms of reuse of such Open Access shall be governed by a Creative Commons licence – details of these licences and which [Creative Commons](#) licence will apply to this Work are set out in our licence referred to above.

Other than as permitted in any relevant BMJ Author's Self Archiving Policies, I confirm this Work has not been accepted for publication elsewhere, is not being considered for publication elsewhere and does not duplicate material already published. I confirm all authors consent to publication of this Work and authorise the granting of this licence.

1  
2  
3 **Strategies for Enhancing the Initiation of Cholesterol Lowering Medication Among Patients at High**  
4 **Cardiovascular Disease Risk: A Qualitative Descriptive Exploration of Patient and General**  
5 **Practitioners' Perspectives on a Facilitated Relay Intervention in Alberta, Canada**  
6

7 David J.T. Campbell, MD PhD FRCPC<sup>1,2,3</sup>

8 Rachelle C.W. Lee, MSc<sup>4</sup>

9 Kerry A. McBrien, MD MPH CCFP<sup>2,5</sup>

10 Todd J. Anderson, MD PhD FRCPC<sup>3</sup>

11 Hude Quan, MD PhD<sup>2</sup>

12 Alexander A.C. Leung, MD MPH FRCPC<sup>1,2,3</sup>

13 Guanmin Chen, MD PhD<sup>2</sup>

14 Mingshan Lu, PhD<sup>2,6</sup>

15 Christopher Naugler, MD FRCPC<sup>2,7</sup>

16 Sonia Butalia, MD MSc FRCPC<sup>1,2</sup>

17  
18  
19  
20 1 – Department of Medicine, Cumming School of Medicine, University of Calgary, Calgary, AB, Canada

21 2 – Department of Community Health Sciences, Cumming School of Medicine, University of Calgary,  
22 Calgary, AB, Canada

23 3 – Department of Cardiac Sciences, Cumming School of Medicine, University of Calgary, Calgary, AB,  
24 Canada

25 4 – Department of Innovation in Medical Education, Faculty of Medicine, University of Ottawa, Ottawa,  
26 ON, Canada

27 5 – Department of Family Medicine, Cumming School of Medicine, University of Calgary, Calgary, AB,  
28 Canada

29 6 – Department of Economics, Faculty of Arts, University of Calgary, Calgary, AB, Canada

30 7 – Department of Pathology & Laboratory Medicine, Cumming School of Medicine, University of  
31 Calgary, Calgary, AB, Canada  
32  
33

34 Correspondence:

35 Dr. David J.T. Campbell

36 TRW 3E33, 3280 Hospital Dr NW

37 Calgary, AB, Canada T2N 4Z6

38 [dcampbel@ucalgary.ca](mailto:dcampbel@ucalgary.ca)

39 403-210-9511  
40  
41

42 Word count: Main text (4861 words), abstract (283 words), 3 tables, 1 figure, 3 appendices  
43  
44  
45  
46  
47  
48  
49  
50  
51  
52  
53  
54  
55  
56  
57  
58  
59  
60

**ABSTRACT**

**Objective:** The objective of our study was to explore the perspectives of patients and general practitioners (GPs) regarding interventions to increase initiation of cholesterol lowering medication (or statins), including a proposed laboratory-based facilitated relay intervention.

**Design:** Qualitative descriptive study using interviews and focus groups for data collection, and thematic analysis for data analysis.

**Setting:** Primary care providers and patients in Calgary, Alberta, Canada.

**Participants:** 17 General Practitioners with primarily community-based, non-academic practices with at least 1 year of practice experience participated in semi-structured interviews. 14 patients at high risk of cardiovascular disease participated in focus groups.

**Main outcome measures:** Exploration of strategies that might be used to enhance the prescription of, and adherence to statin therapy for patients with statin-indicated conditions.

**Results:** GPs proposed a variety of interventions to improve statin prescription, including electronic record audit solutions, GP directed education and patient-oriented campaigns. Patients expressed that they may benefit from being provided access to their laboratory test results, as well as targeted education. Both parties provided positive feedback on the proposed laboratory-based facilitated relay intervention, while pointing out areas for improvement. Notably, GPs were concerned that the patient-directed component of the intervention might jeopardize their therapeutic relationship, and patients were concerned about accidental disclosure of their personal information. Important considerations for the design of facilitated relay messaging should include brevity, simplicity and the provision of contact information for questions.

**Conclusions:** GPs and patients described several suggestions for increasing statin initiation and welcomed the proposal of a laboratory-based facilitated relay strategy. These findings support further testing of this intervention which may enhance GPs' ability to successfully engage patients in cardiovascular risk reduction through statin therapy.

**Keywords:** focus groups, qualitative research, interviews, statins, facilitated relay

## Strengths & Limitations of this Study

- This is a qualitative study, with relatively few participants – therefore we cannot say definitively if the views represented here represent those of all patients and prescribers.
- We sampled physician participants to the point of saturation, which means that we are confident the views represented here span the breadth of those held by physicians.
- The patient sample we recruited may not be representative of the broader population, as many of them had previously stated an interest in quality improvement and research – and therefore may be attuned to the importance of preventive therapies more than other members of the general public. Additionally, this group was not sampled to saturation, as opposed to the physician participants.
- Given the context-dependent nature of qualitative data, the applicability of these findings to other settings is not certain.
- One of the major strengths of this study is the depth and richness of the qualitative data that were collected. By asking questions in an open-ended manner, we were able to record detailed accounts and opinions.

## INTRODUCTION

Vascular disease, including coronary artery disease, peripheral artery disease, and cerebrovascular disease, remains among the leading causes of mortality worldwide (1). A class of medications, HMG-CoA reductase inhibitors, commonly known as statins, have been proven to be effective for lowering the risk of vascular events (2). Individuals who have previously had vascular disease (i.e. secondary prevention) derive a greater absolute risk reduction from statins than those who have never had vascular disease (i.e. primary prevention) (3). There are some individuals who have never had vascular disease, such as those with diabetes or chronic kidney disease, who also have been shown in randomized controlled trials to benefit from therapy (4-6). Despite over 30 years of clinical use, efficacy, safety and cost-effectiveness data (7, 8), only 23% to 55% of individuals who would benefit take this medication and fewer than half of individuals are treated to target cholesterol levels(7, 9-11). There is substantial unwanted variability in dyslipidemia management and health system intervention is required to promote equitable treatment (12, 13). The lack of statin treatment for patients with indicated conditions results in significant excess morbidity and mortality. In Canada, specifically, if all patients with indications for statins were treated, this would result in nearly 40,000 cardiovascular events avoided (14). In the United States, 13% of cardiovascular deaths could be averted with perfect statin adherence among patients at high cardiovascular risk (15).

Physicians and patients face numerous barriers when it comes to prescribing and adhering to statin therapy, from the providers perspective this includes lack of knowledge, conflicting clinical guidelines, lack of systems to identify patients who should be taking statins (16). On the other hand, patients often experience or fear side effects or are simply averse to taking additional medications (16). Furthermore, patients that face social disadvantages such as low income, lack of health insurance, and minority race are more likely to not use statins (17). A large US-based survey found that side effects were common and that many former statin users were unsatisfied with the explanation provided by their prescriber about the importance of the medication (18). Providers need resources to help them provide this counselling to patients and to arm them with strategies to mitigate common statin side effects, like muscle aches (19).



1  
2  
3 83 There are clearly many challenges that lead to the observed clinical treatment gap for patients who have  
4 84 indications for statin treatment. However, some studies have shown that such treatment gaps, in  
5 85 related conditions like hypertension, can be closed using quality improvement strategies (20-22).  
6 86 Integrated quality improvement strategies that target both patients and healthcare providers are more  
7 87 likely to achieve quality indicators than strategies which only target one aspect in isolation (21). One  
8 88 such strategy is facilitated relay. Facilitated relay is a quality improvement strategy whereby information  
9 89 about individual patients is sent directly to healthcare providers through a means other than the usual  
10 90 clinical encounter (23). Despite the establishment and promotion of facilitated relay and other quality  
11 91 improvement strategies, there remain significant treatment gaps in hypertension (24) and other chronic  
12 92 conditions (25). Furthermore, while facilitated relay has been shown to be effective in improving a  
13 93 number of cardiovascular risk factors (21, 26), it remains among the least commonly used quality  
14 94 improvement strategies (27) and has not been explored in the management of dyslipidemia.  
15  
16  
17

18 96 For an intervention to have the potential to maximum impact, it is important to have the input of key  
19 97 stakeholders prior to the application of any intervention with a qualitative study being suited to do so  
20 98 (28). This allows for the development of a higher quality intervention, rather than one that relies on  
21 99 physician feedback alone (29). As such, the objective of our study was to explore the perspectives of  
22 100 patients and GPs regarding interventions to increase cholesterol lowering medication (or statin)  
23 101 prescription, including specific feedback on a proposed laboratory-based facilitated relay intervention.  
24 102

## 25 103 **METHODS:**

### 26 104

### 27 105 **Study Design**

28 106  
29 107 We conducted a qualitative descriptive study (28) to explore patients' and general practitioners' (GPs)  
30 108 perspectives on interventions to increase initiation of statins for cardiovascular risk reduction and  
31 109 treatment of high cholesterol. In addition to generic thoughts on potential hypothetical interventions,  
32 110 we specifically sought directed feedback and perceptions on the acceptability of the proposed facilitated  
33 111 relay intervention from both patients and GPs (30). We used the consolidated criteria for reporting  
34 112 qualitative research (COREQ) as the reporting framework for this study (31).  
35  
36  
37

### 38 114 **Proposed Intervention**

39 115  
40 116 We drew from behaviour change theory to develop a facilitated relay intervention to increase statin  
41 117 prescriptions (32-34) (Figure 1). Our proposed intervention partners with our province's single  
42 118 laboratory system to identify individuals who have elevated cholesterol levels, statin-indicated  
43 119 conditions, and who are not currently filling prescriptions for statins. Our lab system has access to  
44 120 province-wide administrative databases, including labs, pharmacy dispensations, and hospitalization  
45 121 data. For every elevated LDL-cholesterol level, the lab would have an algorithm that would check the  
46 122 patients' records for evidence of statin-indicated conditions (administrative markers of myocardial  
47 123 infarction, stroke, diabetes, or chronic kidney disease), and would then identify if they have recently  
48 124 filled a statin prescription. This is possible because of province-wide, linkable databases. For patients  
49 125 who are not filling statins, but who should be, their GP who had ordered the cholesterol levels and the  
50 126 patient, will then each receive a letter outlining the indication for treatment and the potential to benefit  
51 127 from statin therapy. The patient letter will encourage them to speak to their GP, and the GP letter will  
52 128 encourage them to make an appointment to discuss directly with the patient - both with the objective to  
53 129 initiate or renew statin prescriptions. We felt that it was important to include patients in the facilitated  
54  
55  
56  
57  
58  
59  
60

1  
2  
3 130 relay to empower them in discussions with their GP and to enable shared decision-making (35), which  
4 131 has been demonstrated to improve adherence with statins (36).

5 132  
6 133 **Participant Recruitment**  
7 134

8 135 *General Practitioners:* We recruited general practitioners to participate in individual interviews, using a  
9 136 snowball sampling approach. First, we asked key stakeholders in areas of primary care, endocrinology,  
10 137 nephrology and cardiology affiliated with the university medical centre, to recommend community-  
11 138 based (non-academic) GPs to participate in the study. Individuals were then contacted by telephone and  
12 139 email with a formal invitation to participate. GPs who met the following criteria were enrolled: (1)  
13 140 currently practicing in community general practice settings; and, (2) have at least one year of experience  
14 141 as a GP. We sampled participants purposively based on several key demographic characteristics in order  
15 142 to achieve representation across a range of ages, genders and practice types.  
16 143

17 144 *Patients:* We recruited patients who would qualify as recipients of the proposed intervention.  
18 145 Specifically, we were interested in recruiting those at high risk of cardiovascular disease, who self-  
19 146 reported a prior history of high cholesterol, preferably with co-existing vascular disease (myocardial  
20 147 infarction, stroke or peripheral vascular disease), diabetes, or chronic kidney disease. Using a  
21 148 convenience sampling approach, we invited patients who were part of an established advisory panel and  
22 149 previously agreed to be contacted about research opportunities for study participation (37, 38). In  
23 150 addition, patients were recruited using poster advertisements placed throughout the academic health  
24 151 sciences centre and in various clinical care areas where care is provided to patients with diabetes, heart  
25 152 disease and kidney disease.  
26 153

27 154 **Data Collection**  
28 155

29 156 Data was collected from September 2018 to November 2018 using both qualitative semi-structured  
30 157 interviews (with GPs) and focus groups (with patients). We chose focus groups for patients as rich  
31 158 personal disclosures are more likely to occur in this setting than in individual interviews (39). However,  
32 159 we purposely used individually scheduled interviews to offset potential aversion to focus groups by  
33 160 community-based GPs due to their competing clinical demands. Furthermore, we wanted to recruit  
34 161 from both urban and rural locales which is more challenging to do in a focus group.  
35 162

36 163 *Question Guides:* Both focus groups and interviews were guided by question guides (Appendix A & B)  
37 164 which were developed based on a review of the literature (40, 41) and discussion with the research  
38 165 team. These were designed so that they initially asked study participants what they thought would be  
39 166 effective strategies or interventions to improve statin uptake (i.e. prescribing, patient use and  
40 167 adherence). After they had given their unprompted views, participants were then given a brief  
41 168 explanation of facilitated relay, the specifics of the proposed intervention (Figure 1), and they were  
42 169 shown a copy of the proposed intervention letter for GPs (Appendix C). After briefing participants on the  
43 170 principles and practices of facilitated relay and showing them our preliminary documents for the  
44 171 intervention, we asked for feedback. They were then asked for their specific feedback on this  
45 172 intervention.  
46 173

47 174 *Provider Interviews:* All interviews were conducted in-person (in clinician offices) or via telephone, by a  
48 175 female trained research assistant (RCWL) with oversight by experienced study team members. Physician  
49 176 interviews were continued until the point of theoretical saturation when no new information emerged  
50  
51  
52  
53  
54  
55  
56  
57  
58  
59  
60

1  
2  
3 177 from the interviews (42). Because the research objective was relatively focused, interviews were brief  
4 178 and lasted approximately 30 to 45 minutes.

5 179  
6 180 *Patient Focus Groups:* None of the study team were acquainted with or involved in the clinical care of  
7 181 the patients who participated. We convened two focus groups in our academic medical centre which  
8 182 each lasted approximately 90 minutes. No one but researchers (including 1 facilitator and 2 field-note  
9 183 takers) and participants were present. Focus group facilitators tried to ensure that there were no  
10 184 dominant members and provide all participants with equal opportunity to voice their opinions.

11 185  
12 186 Interviews and focus group proceedings were digitally audio-recorded and transcribed verbatim by a  
13 187 professional transcriptionist. Field notes were taken to inform data analysis. All data were anonymized  
14 188 and stored securely. Signed informed consent was received from each study participant. Gift cards were  
15 189 provided to all participants. Ethics approval was granted from the University's Health Research Ethics  
16 190 Board.

### 17 191 18 192 **Data Analysis**

19 193  
20 194 Analysis was completed using conventional qualitative content analysis (43), a method of interpreting  
21 195 interview data with the goal of describing the phenomenon of interest. Transcripts for the initial three  
22 196 interviews were reviewed by three team members (DC, RL and SB), with the objective of inductively  
23 197 establishing a preliminary coding template that was used for subsequent data analysis. All transcripts  
24 198 were then analyzed by two reviewers (DC and RL). Codes were generated from the interview data and  
25 199 systematically applied to identify themes and patterns. The process was iterative, reflexive, and  
26 200 interactive as continual data collection and analysis shaped each other. For example, code titles or  
27 201 definitions identified based on earlier interviews were modified according to the data collected during  
28 202 subsequent interviews. The team met together to review the coding to elicit discussion about the coding  
29 203 strategy and attempted to achieve consensus to resolve coding discrepancies. NVivo 12 (Doncaster,  
30 204 Australia) qualitative data analysis software was used to facilitate the coding process.

### 31 205 32 206 **Patient and public involvement**

33 207  
34 208 Patient partners and family members from the Libin Cardiovascular Institute's established patient and  
35 209 family member advisory group (44) voiced that *prevention* was one of their top research priorities for  
36 210 cardiovascular health. This work is related to prevention of cardiovascular disease. Patients were  
37 211 included in focus groups.

### 38 212 39 213 **RESULTS**

40 214  
41 215 In total, we eventually reached out to 27 GPs to invite them to participate, 4 declined to participate, 3  
42 216 didn't respond to the invitation, 19 were scheduled for interviews, with 2 cancelling. We reached  
43 217 saturation after having completed 17 individual GP interviews (Table 1a). The majority were women  
44 218 (88%) with 65% having graduated from medical school within the last ten years. All GPs spent more  
45 219 than 50% of their time in clinical practice, most were in urban centers within Primary Care Networks  
46 220 (PCNs). PCNs are networks of GPs that share interdisciplinary resources to enhance the delivery of  
47 221 primary care within geographical regions(45); they are associated with improved chronic disease care  
48 222 and outcomes(46).

49 223  
50 224 **Table 1a.** Descriptive statistics for General Practitioners (n = 17).

| Physician characteristics                                                                                   | Total (%)                 |
|-------------------------------------------------------------------------------------------------------------|---------------------------|
| Age (years)                                                                                                 |                           |
| < 40                                                                                                        | 13 (76)                   |
| 40 - 60                                                                                                     | 4 (24)                    |
| Gender                                                                                                      |                           |
| Man                                                                                                         | 2 (12)                    |
| Woman                                                                                                       | 15 (88)                   |
| Years of primary care practice                                                                              |                           |
| < 10                                                                                                        | 14 (83)                   |
| 10 – 20                                                                                                     | 3 (18)                    |
| Years since medical school graduation                                                                       |                           |
| < 10                                                                                                        | 11 (65)                   |
| ≥10                                                                                                         | 6 (35)                    |
| Primary Care Network membership                                                                             |                           |
| Yes                                                                                                         | 15 (88)                   |
| No                                                                                                          | 2 (12)                    |
| Location of primary care practice                                                                           |                           |
| Urban                                                                                                       | 13 (76)                   |
| Rural                                                                                                       | 4 (24)                    |
| Focused practice interest                                                                                   |                           |
| Yes*                                                                                                        | 9 (53)                    |
| No                                                                                                          | 8 (47)                    |
| Clinical practice last 12 months                                                                            |                           |
| Estimated number of patients at high CVD risk                                                               |                           |
| < 20                                                                                                        | 1 (6)                     |
| 20 to 99                                                                                                    | 7 (41)                    |
| ≥100                                                                                                        | 9 (53)                    |
| Use of endocrinology consultation services                                                                  |                           |
| Yes                                                                                                         | 5 (29)                    |
| No                                                                                                          | 12 (71)                   |
| Use of cardiology consultation services                                                                     |                           |
| Yes                                                                                                         | 10 (59)                   |
| No                                                                                                          | 7 (41)                    |
| Use of nephrology consultation services                                                                     |                           |
| Yes                                                                                                         | 3 (18)                    |
| No                                                                                                          | 14 (82)                   |
| Proportion of patients who would be considered high risk on the basis of cardiovascular risk factors (n=14) | Mean: 32%<br>Range 10-75% |
| Proportion of high-risk patients who have a current LDL-level on file (n=9)                                 | Mean: 82%<br>Range 70-90% |

225 \* Focused practice, or special interest types: care of the elderly (n = 2), emergency medicine (n = 1),  
 226 urgent care (n = 1), refugee medicine (n = 1), obstetrics (n = 2), indigenous health (n = 2), lactation (n =  
 227 1).  
 228

229  
230 Our patient focus groups had 8 and 6 participants, respectively (Table 1b). There was a range of ages  
231 represented among patients, with a similar number of men and women. Nearly all had a general  
232 practitioner and were also followed by medical specialist(s). The conditions represented in our patient  
233 group were diabetes, history of myocardial infarction and elevated cholesterol level; none reported a  
234 history of stroke, chronic kidney disease, or peripheral arterial disease.

235  
236 **Table 1b.** Descriptive statistics for patient participants based on self-report (n = 14).

| Patient characteristics                              | Total (%) |
|------------------------------------------------------|-----------|
| Age (years)                                          |           |
| < 40                                                 | 2 (15)    |
| 40 - 60                                              | 5 (39)    |
| > 60                                                 | 6 (46)    |
| Gender                                               |           |
| Men                                                  | 6 (46)    |
| Women                                                | 7 (54)    |
| Chronic condition qualifying as "high CVD risk"      |           |
| High cholesterol only                                | 3 (23)    |
| Diabetes only                                        | 6 (46)    |
| Myocardial infarct (MI) only                         | 1 (8)     |
| Diabetes & MI                                        | 3 (23)    |
| Has a primary care provider                          |           |
| Yes                                                  | 12 (92)   |
| No                                                   | 1 (8)     |
| Followed by a medical specialist                     |           |
| Yes                                                  | 10 (77)   |
| No                                                   | 3 (23)    |
| Self-reported awareness of high cholesterol levels   |           |
| Yes                                                  | 11 (85)   |
| No                                                   | 2 (15)    |
| Current use of statin medication                     |           |
| Yes                                                  | 6 (46)    |
| If not, had spoken with physicians about statins     | 3 (23)    |
| If not, had not spoken with physicians about statins | 4 (31)    |

\*Note one participant did not complete a demographic questionnaire

237

238

### 239 **General suggestions for potential interventions**

240

241 Several themes arose regarding interventions to improve statin initiation during the unprompted  
242 portion of the interviews (Table 2). General practitioner participants described that statin prescribing  
243 may be improved by: (1) enhancing aspects of physician education to promote appropriate statin  
244 prescribing; and, (2) implementation of support tools to help physicians in decision-making and  
245 identification of patients for whom statins are indicated. In addition, patients suggested that having  
246 access to their own laboratory results may enable them to be more effective self-advocates.

247

**Table 2.** General suggestions by general practitioners and patients to increase initiation of statins

|           |                                       |                                                                                                                                                                                                                                                                                                                                                                                                                                                                                                                                                                                                                                                                                                                                                                                                                                                                                                               |
|-----------|---------------------------------------|---------------------------------------------------------------------------------------------------------------------------------------------------------------------------------------------------------------------------------------------------------------------------------------------------------------------------------------------------------------------------------------------------------------------------------------------------------------------------------------------------------------------------------------------------------------------------------------------------------------------------------------------------------------------------------------------------------------------------------------------------------------------------------------------------------------------------------------------------------------------------------------------------------------|
| Providers | Treatment of specific Sub-populations | <p>Patients with chronic kidney disease:<br/> <i>"I struggle with the GFRs [glomerular filtration rate] – knowing when it would be safe, when it wouldn't be safe. I do get confused as to the dosing based on GFR."</i> (GP-05)</p> <p>Patients who previously experienced side effects with statin(s):<br/> <i>"I have one strategy but if somebody is still like 'no, it's completely not tolerable for me' then I don't know what the next step is after that."</i> (GP-13)</p> <p>Elderly patients:<br/> <i>"...getting some better understanding about the elderly. Are there any contraindications to starting on statin therapy? Is there one statin that may be more beneficial than another?"</i> (GP-10)</p> <p>Patients with hypertriglyceridemia:<br/> <i>"I always find it hard to know what to do with triglycerides... more education around how to manage those [patients]."</i> (GP-15)</p> |
|           | Treatment to Targets *                | <p><i>"Most people in my office are confused about what we are doing in terms of treating to the target of 2 mmol/L, because the cardiologist is still sending consults about that, but then we have these family medicine evidence-based groups saying that targets don't matter"</i>. (GP-02)</p> <p><i>"I know the TOP [Towards Optimized Practice] guidelines don't necessarily correlate with CCS [Canadian Cardiovascular Society] guidelines, so there are several schools of thought"</i>. (GP-09)</p> <p><i>"There's no real way to unify the guidelines, but to have an education session on why they're different and how to approach it so maybe you'll break down patient populations that fit better with one guideline versus another"</i>. (GP-08)</p>                                                                                                                                        |
|           | Preferred modality of Education       | <p><i>"we have a lot of drug reps [representatives] coming to town, so it would be great to have more [education] that was not pharma, absolutely"</i>. (GP-04)</p>                                                                                                                                                                                                                                                                                                                                                                                                                                                                                                                                                                                                                                                                                                                                           |
|           | EMR-based tools                       | <p><i>"One thing that would be helpful for me is if there was some automatic flag that came when I saw a patient that would alert to the fact that their treatment is not optimized for their conditions"</i>. (GP-06)</p>                                                                                                                                                                                                                                                                                                                                                                                                                                                                                                                                                                                                                                                                                    |
| Patients  | Laboratory Results                    | <p><i>"I would like to get a copy, in addition to the doctor. I can do with it what I want"</i> (Pt-09)</p> <p><i>"It gets you questioning things so that you can come back to your doctor and say 'I saw these numbers, what does that mean? What do I need to do?'"</i> (Pt-02)</p>                                                                                                                                                                                                                                                                                                                                                                                                                                                                                                                                                                                                                         |

|  |                    |                                                                                                                             |
|--|--------------------|-----------------------------------------------------------------------------------------------------------------------------|
|  | Enhanced education | <i>“What if somebody was going regularly to a lab, and a clinician sort of goes: ‘How are you doing on this?’”. (Pt-08)</i> |
|--|--------------------|-----------------------------------------------------------------------------------------------------------------------------|

248 EMR: electronic medical record

249 \* Specialist guidelines, the 2016 Canadian Cardiovascular Society guideline (47) advocates that patients  
 250 at high risk (based on risk calculators) or those with ‘statin-indicated conditions’ (defined as diabetes,  
 251 chronic kidney disease, or preexisting vascular disease be treated with statin therapy to achieve a target  
 252 LDL-c level of < 2.0 mmol/L. GP Guidelines, the 2015 TOP Alberta Guideline (48) encourages GPs to treat  
 253 high risk patients with moderate-to-high intensity statins and should not repeat lipid levels, or attempt  
 254 to treat to a fixed target.

255

256

### 257 1) General practitioner *education*:

258

259 Nearly all GPs highlighted that there are general areas of knowledge that could be bolstered in order to  
 260 enhance statin prescription. One of the main content areas in which they sought enhanced education  
 261 related to the treatment of specific patient sub-populations, in particular those with chronic kidney  
 262 disease, prior statin side effects, elderly patients, and those with other concurrent lipid disorders (i.e.  
 263 hypertriglyceridemia).

264

265 Whether providers should be treating patients to a specific cholesterol level was a major source of  
 266 confusion. They frequently referenced receiving conflicting advice, including a contradiction in clinical  
 267 practice guidelines(49), some of which advocate for a ‘fire and forget’ approach(8, 50), while  
 268 Canadian(7) and European(51) specialist guidelines recommend a ‘treat-to-target’ approach(7).

269

270 Regarding the modality of education sessions, most preferred in-person education sessions delivered at  
 271 their clinics and delivered by someone who did not have clear conflicts of interest with pharmaceutical  
 272 companies. Many GPs also suggested the use of handouts, tools or algorithms to simplify their decision-  
 273 making process.

274

### 275 2) General practitioner *tools*

276

277 In addition to education, several GPs suggested that the use of automated tools would facilitate their  
 278 prescribing of statins. Most felt that they would benefit from optimizing the use of their electronic  
 279 medical records (EMR) to ‘flag’ individuals who were at high cardiovascular risk or had elevated  
 280 cholesterol levels. Other GPs spoke of wishing for a ‘running list’ of eligible patients, while some  
 281 mentioned using an employee or contractor designated as a panel manager to perform these tasks.

282

### 283 3) *Patient results and information*

284

285 Many patients independently indicated that they would like to have access to their lipid test results,  
 286 without needing to rely on this being conveyed to them by their general practitioner. Some patients also  
 287 suggested that providing them with their own results might reduce the frequency of unnecessary follow-  
 288 up visits; and as a result, alleviate related financial burden on the healthcare system. Doing so was also  
 289 thought to help foster patient engagement with their GP. Patients also felt that having greater access to  
 290 information about cholesterol and treatment might facilitate more patients being on statin therapy.  
 291 Suggestions were made to deliver this through enhanced patient-facing materials (i.e. brochures), as  
 292 well as pharmacists or lab technicians who were able to discuss results and treatment options. Further

1  
2  
3 293 information about patient education, shared decision-making, and clinical decision support tools are  
4 294 described in our other report from this work (16).

5 295

### 6 296 **Feedback on the proposed facilitated relay intervention**

7 297

8 298 Emerging themes regarding our proposed intervention were organized into four major categories: (1)  
9 299 general feedback and impression; (2) suggested changes; (3) intervention details; and, (4) workflow  
10 300 processing considerations.

11 301

#### 12 302 *1) General feedback and impression*

13 303

14 304 General practitioners responded with strongly positive feedback (Table 3), which included that they  
15 305 found the information to be helpful and direct. They generally felt that the letter was written in a clear  
16 306 fashion and with a respectful tone. Several mentioned that the information provided them with  
17 307 reassurance and credibility in making recommendations to their patients.

18 308

19 309 GPs also voiced some questions and potential concerns after hearing about our proposed intervention.

20 310 These concerns included whether the introduction of a facilitated relay intervention might increase their  
21 311 workload, lead to possible disclosure to patients of new diagnoses of conditions that qualified them as  
22 312 high risk (i.e. diabetes), and pose a threat to their therapeutic relationships with patients. In addition,  
23 313 logistical issues around how the letter will be best delivered to ordering providers and patients were  
24 314 raised as concerns.

25 315

26 316 Patients generally felt that bringing their facilitated relay letter to a scheduled appointment would be  
27 317 positive in their relationship by providing structure to the follow-up encounter, holding GPs to account,  
28 318 and enhancing patient-provider communication. Even though most were generally positive, some  
29 319 patients expressed concern about the facilitated relay intervention, including the possibility for privacy  
30 320 breaches and increasing patient anxieties.

31 321

#### 32 322 *2) Suggested information to remove or add*

33 323

34 324 We asked GPs specifically what they would like to see changed in the preliminary materials shown.  
35 325 Almost unanimously, they suggested that the letter would be more appreciated if it were shortened to  
36 326 fit on one page. Several participants suggested removing the references, mention of clinical studies, and  
37 327 guideline citations to make it more reader-friendly. There was also a preference voiced for revising the  
38 328 introductory paragraphs to have direct relevance to individual patient(s):

39 329

40 330 *"I'm going to read it for sure, but then when you start to read it, people might put it down and say*  
41 331 *'oh this is a study intervention', [but] if you have the first thing at the very top: 'you know this person*  
42 332 *has been identified as being at risk' – then it's about the patient rather than being about the*  
43 333 *studies". (GP-16)*

44 334

45 335 A few GPs voiced opinions that specific additions could be made to improve the letter's utility. These  
46 336 suggestions included adding: information about health behavior change (*"the whole picture, as opposed*  
47 337 *to just medication"* (GP-04)); adding contact information for a specialist; and details about how/why a  
48 338 particular individual was flagged as eligible for the facilitated relay intervention: *"It would be helpful if I*  
49 339 *got a name, condition and then the statin-indicated condition, and where the condition was pulled*  
50 340 *from". (GP-01)*



1  
2  
3 341  
4 342 Patient feedback was notable for also suggesting that the intervention provide contact information, in  
5 343 case they have further questions about interpreting their results:  
6 344

7 345 *“back that up with a helpline for somebody that doesn’t know what the [results] mean”* (Pt-10).  
8 346 Similar to physicians, patients expressed a strong preference for brevity: *“If I have to go through 14*  
9 347 *pages of information to figure out what that means, I’m sorry, I don’t have time for that”* (Pt-07).  
10 348

11 349 However, numerous patients also stressed the importance of not only providing results or diagnoses,  
12 350 but also giving some basic education and an action plan to follow.  
13 351

### 14 352 3) Intervention details

15 353

16 354 In addition to general feedback, we also explicitly asked GPs whether they would prefer to receive  
17 355 information about their patient in the form of facilitated relay (individual letter for each patient  
18 356 identified) or ‘audit and feedback’ (summary report including a group of their patient panel). A summary  
19 357 list or report (audit and feedback) was preferred by roughly 2/3 of the general practitioners interviewed.  
20 358 Regarding receiving letters for each patient, participants stated:  
21 359

22 360 *“this is going to get tiresome very quickly”* (GP-05)

23 361  
24 362 *“Am I going to get this letter 20 times? I’m probably just going to read it once”* (GP-03)

25 363  
26 364 *“[a list would] decrease paper burden, decrease the chance of it getting misplaced”*. (GP-13)  
27 365

28 366 While the ‘audit and feedback’ approach was more popular, some GPs were clearly in favor of facilitated  
29 367 relay: *“I can’t even think of the amount of work it would take to do it patient-specific. I’d love it. Sure go*  
30 368 *for it, if you have the means to do it, then why not?”* (GP-10)  
31 369

32 370 We also asked pointedly about how providers would feel about receiving a follow-up reminder from the  
33 371 study team, if patients’ had not filled the prescription as recommended in the initial letter. The response  
34 372 was split with roughly half of the general practitioners stating that a reminder would not be necessary.  
35 373

36 374 Those who felt a reminder would be acceptable generally agreed that a 6 month window should be  
37 375 sufficient to ascertain whether or not the patient would have started on therapy: *“There are people that*  
38 376 *have a three-month wait list time, you may have to pick an interval more like six-months to appeal to the*  
39 377 *masses...”*. (GP-13)  
40 378

41 379 Most patients felt that they would benefit from receiving a follow-up reminder. After considerable  
42 380 discussion amongst the groups, consensus was achieved that follow-up should not happen prior to four  
43 381 months, and possibly even as long as six months after the initial contact. One participant stated: *“close*  
44 382 *enough that I vaguely remember that I meant to do something with that, but not a few weeks later, [so]*  
45 383 *it’s not irritating”*. (GP-17)  
46 384

47 385 We also asked patients if they had a preference for who had signed the letter. Most felt that having  
48 386 letters come from a local specialist in cardiology or endocrinology would be preferable to having them  
49 387 signed by another GP.  
50 388

389 *4) Workflow processing considerations (General practitioners only)*

390  
391 To each GP we asked specific details about how our intervention letter would be received in their offices  
392 and what would happen upon receipt. The majority stated that such a letter would be opened and  
393 processed by their front-desk staff. One participant clarified that the information on the envelope would  
394 determine who opened it: *“if it’s addressed to me then it will come to me, if it has a patient name for  
395 me, then it goes through our document people [who file it]”*. (GP-09)

396  
397 Once the letter has been opened, different offices employed a variety of different processes. In many  
398 practices, it would be given directly to the GP; while in others it would be scanned directly into a  
399 patient’s file in an electronic medical record, yet in others, the hardcopy would be filed in a patient’s  
400 chart.

401  
402 In terms of the preferred delivery modality, most GPs felt that electronic delivery directly via the EMR  
403 platform would be the preferred method of receiving the intervention. However, a number still felt that  
404 conventional delivery via paper mail or fax would be preferable. Even those who expressed a preference  
405 for conventional delivery, many elaborated that such letters would often be scanned into a patient’s  
406 electronic file: *“if it was to come by mail or fax, then they have to scan it onto the computer”* (GP-11). A  
407 few GPs described systems which can do this process automatically: *“our office works with a new web  
408 system, so everything that comes in via the fax actually goes directly into the computer and they then  
409 allocate to the patient”*. (GP-11)

410  
411  
412  
413  
414  
415  
416  
417  
418  
419  
420  
421  
422  
423  
424  
425  
426  
427  
428 **Table 3.** Positive and negative feedback on facilitated relay intervention from general practitioners and patients

| General Practitioners |                                                                                                                                                                                                                        | Patients                                 |                                                                                                                                                                                                                            |
|-----------------------|------------------------------------------------------------------------------------------------------------------------------------------------------------------------------------------------------------------------|------------------------------------------|----------------------------------------------------------------------------------------------------------------------------------------------------------------------------------------------------------------------------|
| <b>Positive</b>       |                                                                                                                                                                                                                        |                                          |                                                                                                                                                                                                                            |
| <b>Composition</b>    | <p>“Overall I thought it was worded quite well and was very clear” (GP-08)</p> <p>“I think it’s appropriate, it didn’t take me very long to get through” (GP-16)</p>                                                   | <b>Provides structure to interaction</b> | <p>“My doctor would be okay with that. It gives them a little checklist of things to talk about”. (Pt-05)</p>                                                                                                              |
| <b>Tone</b>           | <p>“it’s written in a way that doesn’t make you feel stupid, I guess” (GP-11)</p> <p>“it’s good because [it’s] not telling you to do this [start statin therapy], but telling you to have a conversation.” (GP-17)</p> | <b>Enhances communication</b>            | <p>“I think that’s good ‘cause these doctors, some guys don’t communicate.” (Pt-13)</p>                                                                                                                                    |
| <b>Credibility</b>    | <p>“it gives family physicians more confidence to do those things and know the specialists are behind them in that recommendation” (GP-02)</p>                                                                         | <b>Increases doctor accountability</b>   | <p>“I think it keeps them [doctors] honest as well. They should actually be proactive in terms of having that information already, but that’s not always the case. So I don’t have a problem with a patient having all</p> |

|                                 |                                                                                                                                                                                                                                                                                                                                                                     |                                         |                                                                                                                                                                                                                                                                                                                                                                                                  |
|---------------------------------|---------------------------------------------------------------------------------------------------------------------------------------------------------------------------------------------------------------------------------------------------------------------------------------------------------------------------------------------------------------------|-----------------------------------------|--------------------------------------------------------------------------------------------------------------------------------------------------------------------------------------------------------------------------------------------------------------------------------------------------------------------------------------------------------------------------------------------------|
|                                 | <p>“there’s so much information for people to sift through... if you can get valid information that’s corroborated and consistent, that’s helpful” (GP-15)</p>                                                                                                                                                                                                      |                                         | <p>their information at their disposal”. (Pt-14)</p>                                                                                                                                                                                                                                                                                                                                             |
| <b>Direct</b>                   | <p>“it’s a good idea... it tells you what to do, which is great. You don’t have to look up the guideline every time” (GP-04)</p> <p>“it’s just one of those extra little reminders that takes the brain power out of the work you have to do day-to-day” (GP-06)</p>                                                                                                | <b>Increases patient accountability</b> | <p>“If [patients] are encouraged to work with their doctor to monitor your numbers, you have a bit of control as well as the doctor... like working together”. (Pt-03)</p>                                                                                                                                                                                                                       |
| <b>Information</b>              | <p>“[side effects] are what people hear about in the news a lot, so it’s very helpful to have some numbers around it, and strategies to address that” (GP-09)</p> <p>“All the suggestions that you made are excellent. I’m reading through this and I’m like ‘oh yeah, I didn’t realize this’ and ‘this is something I can do for some of my patients’” (GP-12)</p> | <b>Provides peace of mind</b>           | <p>“It gives me a little peace of mind in that we’ve talked about all of the things that are important and that should be covered... that we haven’t left anything out”. (Pt-05)</p>                                                                                                                                                                                                             |
| <b>Negative</b>                 |                                                                                                                                                                                                                                                                                                                                                                     |                                         |                                                                                                                                                                                                                                                                                                                                                                                                  |
| <b>Increased workload</b>       | <p>“I would caution against anything that causes more documents or more paperwork... there’s already so much” (GP-16)</p>                                                                                                                                                                                                                                           | <b>Privacy concerns</b>                 | <p>“You know what, my doctor isn’t going to send it out to me, anyway. It’s going to go on to a receptionist, who might pass it on to somebody else in the office, so there’s no guarantee of privacy there” (Pt-05)</p> <p>“Privacy is always an issue. I mean it’s like, the less information that’s out there about you, the better off you are, period. I don’t care what it is” (Pt-07)</p> |
| <b>Disclosing new diagnoses</b> | <p>“my concern is that they get this information from a letter... my preference would be that it came straight to me” (GP-01)</p>                                                                                                                                                                                                                                   | <b>Difficulty interpreting results</b>  | <p>“Some people might know all the numbers and everything else, I don’t. You give me a bunch of numbers, it means nothing to me. So unless the doctor explained it to me... I’d rather talk to my doctor” (Pt-07)</p>                                                                                                                                                                            |

|                                 |                                                                                                                                                                                                                 |                              |                                                                                                                                                                                                                                                                               |
|---------------------------------|-----------------------------------------------------------------------------------------------------------------------------------------------------------------------------------------------------------------|------------------------------|-------------------------------------------------------------------------------------------------------------------------------------------------------------------------------------------------------------------------------------------------------------------------------|
| <b>Therapeutic relationship</b> | “If the patient gets a letter that’s like ‘you need to be on a statin’ and we already had a conversation that they didn’t need a statin. That could cause some issues in the therapeutic relationship.” (GP-04) | <b>Provoking Anxieties</b>   | “There are people who are coming down with every disease known to man, so for someone like that, that kind of information would just send them off the deep-end, right?” (Pt-05)                                                                                              |
| <b>Logistical concerns</b>      | “What if a person gets a check from a walk-in clinic? My concern is then is that walk-in clinic docs are just going to ignore this letter” (MD-05)                                                              | <b>Lack of engagement</b>    | “You mentioned mail outs and things like that... have they proven to be effective, though, ‘cause how many people read them? How many people understand them? I don’t think there would be a lot of point in it, ‘cause I don’t think people pay that much attention” (Pt-09) |
|                                 | “If it goes to the patient, sometimes you get lots of mail and they may just discard it” (MD-10)                                                                                                                | <b>Sense of intimidation</b> | “Some will [say] ‘I can’t talk to my doctor like that’. There will be some people who might be intimidated to initiate that conversation” (Pt-03)                                                                                                                             |

## DISCUSSION

While statins have a more limited role in certain populations (low risk and those with limited life expectancy) (52, 53), they are important for the prevention of cardiovascular disease in patients who have previous atherosclerotic disease and in those with diabetes and kidney disease (4-6, 47). In this study, both GPs and patients acknowledged that there is the potential to improve the prescription and use of statin therapy among those at high risk for cardiovascular disease. In unprompted questions, GPs acknowledged that there was a need for improved physician education on this topic, and that tools to help identify and track patients would be helpful. Patients also suggested that providing themselves with laboratory test results and information on treatment options may result in better medical care, generally supporting our hypothesis that facilitating shared decision making was a key element of a novel intervention. When shown the proposed intervention, both groups were strongly supportive of the facilitated relay intervention. While there were clear benefits to the intervention, some potential downsides were raised from both GPs and patient perspectives. In general, all recipients would prefer letters to be succinct, yet contain high yield information and provide contact information where clarification could be sought.

A number of interventions have been attempted to address the problem of statin underuse. A number of patient-centered approaches have been tried with varying success (22). While active forms of education, like cognitive education and behavioural counselling seem to work (54), more passive forms of education are often unsuccessful at changing behaviour, as in the recent ISLAND trial which found their intervention, comprised of a mail and phone education strategy to encourage patients to take prescribed medication, had no impact on adherence (55). Others have found that multifaceted interventions focusing on enhancing care provision through team-based care may be effective at increasing statin adherence (56).

However, when trying to target the problem of low statin prescribing, interventions directed only at patients are not likely to work. An alternate approach is to facilitate GPs ability to identify and prescribe

1  
2  
3 441 statins, to those in whom they are appropriate (57), through audit and feedback or facilitated relay. An  
4 442 educational audit and feedback intervention regarding dyslipidemia treatment in Italian primary care  
5 443 practices was shown to increase adherence to statins by approximately 10% (58). Improved  
6 444 communication and shared decision making, which are explicit goals of facilitated relay interventions,  
7 445 can improve patient adherence (59). While these and other studies have reviewed the clinical efficacy of  
8 446 quality improvement strategies (21), few have used detailed qualitative methods as we have done. One  
9 447 large qualitative study interviewed audit and feedback experts to generate hypotheses about the  
10 448 various factors that may contribute to the efficacy of such interventions (60). Others have used  
11 449 qualitative methods to highlight the barriers physicians face in encouraging adherence (61), but ours is  
12 450 unique in using such methods to design and develop an intervention to address these challenges. Finally,  
13 451 we also appreciate that as much as there is underuse of statins, there is also overuse, for example, in  
14 452 people with short life expectancy. Perhaps interventions to increase initiation may also include a  
15 453 component that conveys statin benefits are measured in years rather than months.  
16 454

17 455 The fact that participants suggested elements of our facilitated relay intervention in the unprompted  
18 456 portion of the interviews lends credibility and face validity to the proposed intervention. However, it is  
19 457 notable that while GPs felt they would benefit from having internal systems to monitor patients'  
20 458 records, none independently suggested a strategy mediated by an independent third party (such as  
21 459 facilitated relay or audit and feedback), as we have proposed. Investigators who wish to implement  
22 460 facilitated relay interventions to enhance adherence to medical therapies can use the findings of this  
23 461 study to help develop interventions that are more likely to be acceptable to both GPs and patients. One  
24 462 of the main findings is to ensure that any such information is brief and high yield, containing patient  
25 463 identifiers early to capture general practitioner's attention. Such interventions can be strengthened by  
26 464 incorporating education on controversial or little-known topics. Patients strongly preferred any  
27 465 correspondence to also contain direct suggestions or an action plan. Workflow and processing of these  
28 466 letters needs to be considered and interventions designed to be as minimally disruptive to clinical  
29 467 practice as possible – with most physicians preferring that it be embedded directly within the EMR; yet  
30 468 in healthcare settings (like ours) where there is marked heterogeneity in the use and type of EMRs, this  
31 469 may not be possible.  
32 470

33 471 There are limitations to this study. Firstly, as in most qualitative studies, the number of participants was  
34 472 relatively small. This limitation is mitigated by the fact that physician interviews proceeded until the  
35 473 point of saturation. Patient data were not collected in this manner, and these themes may not be fully  
36 474 saturated and we appreciate this as a limitation. Furthermore, the patient sample we recruited may not  
37 475 be representative of the broader population, as many of them had previously stated an interest in  
38 476 quality improvement and research and therefore may be attuned to the importance of preventive  
39 477 therapies more than other members of the general public. Secondly, given the context-dependent  
40 478 nature of qualitative data, the applicability of these findings to other settings is not certain. Yet  
41 479 physicians face similar problems (i.e. time constraints, patient complexity and comorbidities and patient  
42 480 resistance to medical therapies) in numerous facets of medical care; therefore, it is conceivable that the  
43 481 findings of this study would apply to interactions between patients and GPs in other clinical settings.  
44 482 Due to time constraints of participants and researchers, member checking was not undertaken in this  
45 483 study. Finally, it is important to note that feedback was sought specifically about the proposed  
46 484 intervention. However, given the details reported, we feel that these findings are likely to be helpful to  
47 485 others proposing similar quality improvement interventions. One of the major strengths of this study is  
48 486 the depth and richness of the qualitative data that were collected. By asking questions in an open-ended  
49 487 manner, we were able to record detailed accounts and opinions. Another strength of this work is the  
50  
51  
52  
53  
54  
55  
56  
57  
58  
59  
60

1  
2  
3 488 fact that we also sought patient input into the development of this intervention, rather than relying on  
4 489 physician feedback alone.

5 490  
6 491 Statin therapy has been demonstrated to effectively lower cholesterol and reduce the risk of  
7 492 cardiovascular events and death in individuals at high risk of cardiovascular disease. Despite this, they  
8 493 remain underused. There are patient, provider and system factors that contribute to the underuse of  
9 494 statins. Facilitated relay interventions hold promise as a potential method to address this important care  
10 495 gap. Our study sought perspectives of both healthcare providers and patients, which will be  
11 496 incorporated into intervention design to maximize acceptability. Insights gained from qualitative data  
12 497 will be used to improve the likelihood of success and achieve the desired clinical impact. The insights  
13 498 about these interventions are also likely to be of interest to many researchers and clinicians who are  
14 499 considering and designing provider- and/or patient-facing interventions to improve the uptake of  
15 500 preventive medications.

16 501  
17 502  
18 503 **Contributions**

19 504 DJTC, RCWL, KAM, TJA, HQ, AACL, GC, ML, CN, SB collaborated to develop the research question and  
20 505 methods. The study design was conceived by DJTC and SB. DJTC wrote the first draft of the study  
21 506 protocol. Data collection and analysis was completed by DJTC, RCWL and SB. KAM, TJA, HQ, AACL, GC,  
22 507 ML, and CN contributed to the interpretation and contextualization of study findings. The first draft of  
23 508 the manuscript was written by DJTC. RCWL, KAM, TJA, HQ, AACL, GC, ML, CN, and SB contributed  
24 509 substantively to further revisions of the manuscript and have consented to the publication of this  
25 510 version.

26 511  
27 512 **Data Availability Statement**

28 513 No additional data available. Given that qualitative data are not deidentified and tell individuals'  
29 514 personal stories, data cannot be shared beyond the scope of this project, as per our research ethics  
30 515 board.

31 516  
32 517 **Competing Interest Statement**

33 518 DC, RL, KAM, AL, TA, HQ, GC, SB – none. CN is a director of a private laboratory that does not currently  
34 519 offer testing in the jurisdiction under study.

35 520  
36  
37  
38  
39  
40  
41  
42  
43  
44  
45  
46  
47  
48  
49  
50  
51  
52  
53  
54  
55  
56  
57  
58  
59  
60

## References

1. World Health Organization. The top 10 causes of death 2018 [Available from: <https://www.who.int/news-room/fact-sheets/detail/the-top-10-causes-of-death>].
2. Silverman MG, Ference BA, Im K, Wiviott SD, Giugliano RP, Grundy SM, et al. Association Between Lowering LDL-C and Cardiovascular Risk Reduction Among Different Therapeutic Interventions: A Systematic Review and Meta-analysis. *JAMA*. 2016;316(12):1289-97.
3. Byrne P, Cullinan J, Smith SM. Statins for primary prevention of cardiovascular disease. *BMJ*. 2019;367:l5674.
4. Colhoun HM, Betteridge DJ, Durrington PN, Hitman GA, Neil HA, Livingstone SJ, et al. Primary prevention of cardiovascular disease with atorvastatin in type 2 diabetes in the Collaborative Atorvastatin Diabetes Study (CARDS): multicentre randomised placebo-controlled trial. *Lancet*. 2004;364(9435):685-96.
5. Baigent C, Landray MJ, Reith C, Emberson J, Wheeler DC, Tomson C, et al. The effects of lowering LDL cholesterol with simvastatin plus ezetimibe in patients with chronic kidney disease (Study of Heart and Renal Protection): a randomised placebo-controlled trial. *Lancet*. 2011;377(9784):2181-92.
6. Collins R, Armitage J, Parish S, Sleight P, Peto R, Heart Protection Study Collaborative G. MRC/BHF Heart Protection Study of cholesterol-lowering with simvastatin in 5963 people with diabetes: a randomised placebo-controlled trial. *Lancet*. 2003;361(9374):2005-16.
7. Anderson TJ, Grégoire J, Pearson GJ, Barry AR, Couture P, Dawes M, et al. 2016 Canadian Cardiovascular Society Guidelines for the Management of Dyslipidemia for the Prevention of Cardiovascular Disease in the Adult. *Canadian Journal of Cardiology*. 2016;32(11):1263-82.
8. Grundy SM, Stone NJ. 2018 American Heart Association/American College of Cardiology/Multisociety Guideline on the Management of Blood Cholesterol-Secondary Prevention. *JAMA Cardiol*. 2019;4(6):589-91.
9. Butalia S, Lewin A, Simpson S, Dasgupta K, Khan N, Pilote L, et al. Sex-based disparities in cardioprotective medication use in adults with diabetes. *Diabetol Metab Syndr*. 2014;5(6):117.
10. Anderson TJ, Grégoire J, Hegele RA, Couture P, Mancini GBJ, McPherson R, et al. 2012 Update of the Canadian Cardiovascular Society Guidelines for the Diagnosis and Treatment of Dyslipidemia for the Prevention of Cardiovascular Disease in the Adult. *Canadian Journal of Cardiology*. 2013;29(2):151-67.
11. Johansen ME, Green LA, Sen A, Kircher S, Richardson CR. Cardiovascular Risk and Statin Use in the United States. *The Annals of Family Medicine*. 2014;12(3):215-23.
12. Gamble JM, Butalia S. Medical Practice Variations in Diabetes Mellitus. In: Johnson A, Stukel T, editors. *Medical Practice Variations*. Health Services Research: Springer US; 2015. p. 1-40.
13. Tu JV, Chu A, Maclagan L, Austin PC, Johnston S, Ko DT, et al. Regional variations in ambulatory care and incidence of cardiovascular events. *Canadian Medical Association Journal*. 2017;189(13):E494-E501.
14. Hennessy DA, Tanuseputro P, Tuna M, Bennett C, Perez R, Shields M, et al. Population health impact of statin treatment in Canada. *Health Rep*. 2016;27(1):20-8.
15. Yang Q, Zhong Y, Gillespie C, Merritt R, Bowman B, George MG, et al. Assessing potential population impact of statin treatment for primary prevention of atherosclerotic cardiovascular diseases in the USA: population-based modelling study. *BMJ Open*. 2017;7(1):e011684.
16. Butalia S, Lee-Krueger R, McBrien K, Leung A, Anderson T, Quan H, et al. Barriers and Facilitators to Using Statins: A Qualitative Study with Patients and Family Physicians *Canadian Journal of Cardiology Open*. 2020;Online ahead of print.

- 1  
2  
3 566 17. Schroff P, Gamboa CM, Durant RW, Oikeh A, Richman JS, Safford MM. Vulnerabilities to Health  
4 567 Disparities and Statin Use in the REGARDS (Reasons for Geographic and Racial Differences in Stroke)  
5 568 Study. *J Am Heart Assoc.* 2017;6(9).
- 6 569 18. Cohen JD, Brinton EA, Ito MK, Jacobson TA. Understanding Statin Use in America and Gaps in  
7 570 Patient Education (USAGE): an internet-based survey of 10,138 current and former statin users. *J Clin*  
8 571 *Lipidol.* 2012;6(3):208-15.
- 9 572 19. Jacobson TA, Khan A, Maki KC, Brinton EA, Cohen JD. Provider recommendations for patient-  
10 573 reported muscle symptoms on statin therapy: Insights from the Understanding Statin Use in America  
11 574 and Gaps in Patient Education survey. *J Clin Lipidol.* 2018;12(1):78-88.
- 12 575 20. Worrall G, Chaulk P, Freake D. The effects of clinical practice guidelines on patient outcomes in  
13 576 primary care: a systematic review. *CMAJ.* 1997;156(12):1705-12.
- 14 577 21. Tricco AC, Ivers NM, Grimshaw JM, Moher D, Turner L, Galipeau J, et al. Effectiveness of quality  
15 578 improvement strategies on the management of diabetes: a systematic review and meta-analysis. *Lancet.*  
16 579 2012;379(9833):2252-61.
- 17 580 22. Rash JA, Campbell DJ, Tonelli M, Campbell TS. A systematic review of interventions to improve  
18 581 adherence to statin medication: What do we know about what works? *Prev Med.* 2016;90:155-69.
- 19 582 23. Walsh J, McDonald KM, Shojania KG, Sundaram V, Nayak S, Davies S, et al. Closing the Quality  
20 583 Gap: A Critical Analysis of Quality Improvement Strategies (Vol 3: Hypertension Care). AHRQ Technical  
21 584 Reviews. Rockville (MD)2005.
- 22 585 24. Zhang Y, Moran AE. Trends in the Prevalence, Awareness, Treatment, and Control of  
23 586 Hypertension Among Young Adults in the United States, 1999 to 2014. *Hypertension.* 2017;70(4):736-42.
- 24 587 25. Jardine MJ, Kasiske B, Adu D, Alrukhaimi M, Ashuntantang GE, Basnet S, et al. Closing the gap  
25 588 between evidence and practice in chronic kidney disease. *Kidney Int Suppl (2011).* 2017;7(2):114-21.
- 26 589 26. Walsh JM, McDonald KM, Shojania KG, Sundaram V, Nayak S, Lewis R, et al. Quality  
27 590 improvement strategies for hypertension management: a systematic review. *Med Care.* 2006;44(7):646-  
28 591 57.
- 29 592 27. Campbell DJ, Sargious P, Lewanczuk R, McBrien K, Tonelli M, Hemmelgarn B, et al. Use of  
30 593 chronic disease management programs for diabetes: in Alberta's primary care networks. *Can Fam*  
31 594 *Physician.* 2013;59(2):e86-92.
- 32 595 28. Sandelowski M. Whatever happened to qualitative description? *Res Nurs Health.* 2000;23(4):7.
- 33 596 29. Pope C, van Royen P, Baker R. Qualitative methods in research on healthcare quality. *Qual Saf*  
34 597 *Health Care.* 2002;11(2):148-52.
- 35 598 30. Ayala GX, Elder JP. Qualitative methods to ensure acceptability of behavioral and social  
36 599 interventions to the target population. *J Public Health Dent.* 2011;71 Suppl 1:S69-79.
- 37 600 31. Tong A, Sainsbury P, Craig J. Consolidated criteria for reporting qualitative research (COREQ): a  
38 601 32-item checklist for interviews and focus groups. *Int J Qual Health Care.* 2007;19(6):349-57.
- 39 602 32. Michie S, van Stralen MM, West R. The behaviour change wheel: a new method for  
40 603 characterising and designing behaviour change interventions. *Implement Sci.* 2011;6:42.
- 41 604 33. Cane J, O'Connor D, Michie S. Validation of the theoretical domains framework for use in  
42 605 behaviour change and implementation research. *Implement Sci.* 2012;7:37.
- 43 606 34. Michie S, Johnston M, Francis J, Hardeman W, Eccles M. From Theory to Intervention: Mapping  
44 607 Theoretically Derived Behavioural Determinants to Behaviour Change Techniques. *Applied Psychology.*  
45 608 2008;57(4):660-80.
- 46 609 35. Barrett B, Ricco J, Wallace M, Kiefer D, Rakel D. Communicating statin evidence to support  
47 610 shared decision-making. *BMC Fam Pract.* 2016;17:41.
- 48 611 36. Weymiller AJ, Montori VM, Jones LA, Gafni A, Guyatt GH, Bryant SC, et al. Helping patients with  
49 612 type 2 diabetes mellitus make treatment decisions: statin choice randomized trial. *Arch Intern Med.*  
50 613 2007;167(10):1076-82.



- 1  
2  
3 614 37. Santana M, Zelinsky S, Ahmed S, Doktorchik C, James M, Wilton S, et al. Working Together with  
4 615 Patients and Clinician Researchers to Improve Cardiovascular Health. 2018 SPOR Summit; Ottawa, ON.  
5 616 38. Santana M, Zelinsky S, Ahmed S, Doktorchik C, James M, Wilton S, et al. Working Together: Co-  
6 617 designing Priorities for Patient-Oriented Cardiovascular Research by Patients, Clinicians, and  
7 618 Researchers. Canadian Association for Health Services and Policy Research (CAHSPR); Halifax, NS2019.  
8 619 39. Guest G, Namey E, Taylor J, Eley N, McKenna K. Comparing focus groups and individual  
9 620 interviews: findings from a randomized study. *Int J Soc Res Methodol*. 2017;20(6):693-708.  
10 621 40. Kedward J, Dakin L. A qualitative study of barriers to the use of statins and the implementation  
11 622 of coronary heart disease prevention in primary care. *Br J Gen Pract*. 2003;53(494):684-9.  
12 623 41. Maningat P, Gordon BR, Breslow JL. How do we improve patient compliance and adherence to  
13 624 long-term statin therapy? *Curr Atheroscler Rep*. 2013;15(1):291.  
14 625 42. Walker JL. The use of saturation in qualitative research. *Can J Cardiovasc Nurs*. 2012;22(2):37-  
15 626 46.  
16 627 43. Hsieh HF, Shannon SE. Three approaches to qualitative content analysis. *Qual Health Res*.  
17 628 2005;15(9):1277-88.  
18 629 44. Santana MJ, Zelinsky S, Ahmed S, Doktorchik C, James M, Wilton S, et al. Patients, clinicians and  
19 630 researchers working together to improve cardiovascular health: a qualitative study of barriers and  
20 631 priorities for patient-oriented research. *BMJ Open*. 2020;10(2):e031187.  
21 632 45. Drew P, Jones B, Norton D. Team effectiveness in primary care networks in Alberta. *Healthc Q*.  
22 633 2010;13(3):33-8.  
23 634 46. Manns BJ, Tonelli M, Zhang J, Campbell DJT, Sargious P, Ayyalasomayajula B, et al. Enrolment in  
24 635 primary care networks: impact on outcomes and processes of care for patients with diabetes. *Canadian*  
25 636 *Medical Association Journal*. 2012;184(2):E144-E52.  
26 637 47. Anderson TJ, Gregoire J, Pearson GJ, Barry AR, Couture P, Dawes M, et al. 2016 Canadian  
27 638 Cardiovascular Society Guidelines for the Management of Dyslipidemia for the Prevention of  
28 639 Cardiovascular Disease in the Adult. *Can J Cardiol*. 2016;32(11):1263-82.  
29 640 48. Toward Optimized Practice Cardiovascular Disease Risk Working Group. Prevention and  
30 641 management of cardiovascular disease risk in primary care clinical practice guideline Edmonton, AB:  
31 642 Toward Optimized Practice; 2015 [Available from:  
32 643 <https://top.albertadoctors.org/CPGs/Lists/CPGDocumentList/CVD-Risk-CPG.pdf>.  
33 644 49. Tibrewala A, Jivan A, Oetgen WJ, Stone NJ. A Comparative Analysis of Current Lipid Treatment  
34 645 Guidelines: Nothing Stands Still. *J Am Coll Cardiol*. 2018;71(7):794-9.  
35 646 50. Toward Optimized Practice (TOP) Cardiovascular Disease Risk Working Group. Prevention and  
36 647 management of cardiovascular disease risk in primary care clinical practice  
37 648 guideline 2015 [Available from:  
38 649 <http://www.topalbertadoctors.org/download/1655/Lipid%20Pathway%20CPG.pdf>? 20150916105016.  
39 650 51. Catapano AL, Graham I, De Backer G, Wiklund O, Chapman MJ, Drexel H, et al. 2016 ESC/EAS  
40 651 Guidelines for the Management of Dyslipidaemias. *Rev Esp Cardiol (Engl Ed)*. 2017;70(2):115.  
41 652 52. Kristensen M, Christensen PM, Hallas J. The effect of statins on average survival in randomised  
42 653 trials, an analysis of end point postponement. *BMJ Open*. 2014;5(007118).  
43 654 53. Abramson JD, Rosenberg HG, Jewell N, Wright JM. Should people at low risk of cardiovascular  
44 655 disease take a statin? *BMJ*. 2013;347:f6123.  
45 656 54. Jornten-Karlsson M, Pintat S, Molloy-Bland M, Berg S, Ahlqvist M. Patient-Centered  
46 657 Interventions to Improve Adherence to Statins: A Narrative Synthesis of Systematically Identified  
47 658 Studies. *Drugs*. 2016;76(15):1447-65.

- 1  
2  
3 659 55. Ivers NM, Schwalm JD, Bouck Z, McCreedy T, Taljaard M, Grace SL, et al. Interventions  
4 660 supporting long term adherence and decreasing cardiovascular events after myocardial infarction  
5 661 (ISLAND): pragmatic randomised controlled trial. *BMJ*. 2020;369:m1731.  
6 662 56. van Driel ML, Morledge MD, Ulep R, Shaffer JP, Davies P, Deichmann R. Interventions to improve  
7 663 adherence to lipid-lowering medication. *Cochrane Database Syst Rev*. 2016;12:CD004371.  
8 664 57. Kaya H, Beton O, Yilmaz M. How to increase level of patients' awareness regarding the  
9 665 importance of statins despite the influence of the media? *International Journal of Cardiology*.  
10 666 2016;207:164.  
11 667 58. Casula M, Tragni E, Piccinelli R, Zambon A, De Fendi L, Scotti L, et al. A simple informative  
12 668 intervention in primary care increases statin adherence. *Eur J Clin Pharmacol*. 2016;72(2):227-34.  
13 669 59. Wilson SR, Strub P, Buist AS, Knowles SB, Lavori PW, Lapidus J, et al. Shared treatment decision  
14 670 making improves adherence and outcomes in poorly controlled asthma. *Am J Respir Crit Care Med*.  
15 671 2010;181(6):566-77.  
16 672 60. Colquhoun HL, Carroll K, Eva KW, Grimshaw JM, Ivers N, Michie S, et al. Advancing the literature  
17 673 on designing audit and feedback interventions: identifying theory-informed hypotheses. *Implement Sci*.  
18 674 2017;12(1):117.  
19 675 61. Kvarnström K, Airaksinen M, Liira H. Barriers and facilitators to medication adherence: a  
20 676 qualitative study with general practitioners. *BMJ Open*. 2018;8(1):e015332.

21  
22  
23  
24 677  
25 678  
26  
27  
28  
29  
30  
31  
32  
33  
34  
35  
36  
37  
38  
39  
40  
41  
42  
43  
44  
45  
46  
47  
48  
49  
50  
51  
52  
53  
54  
55  
56  
57  
58  
59  
60

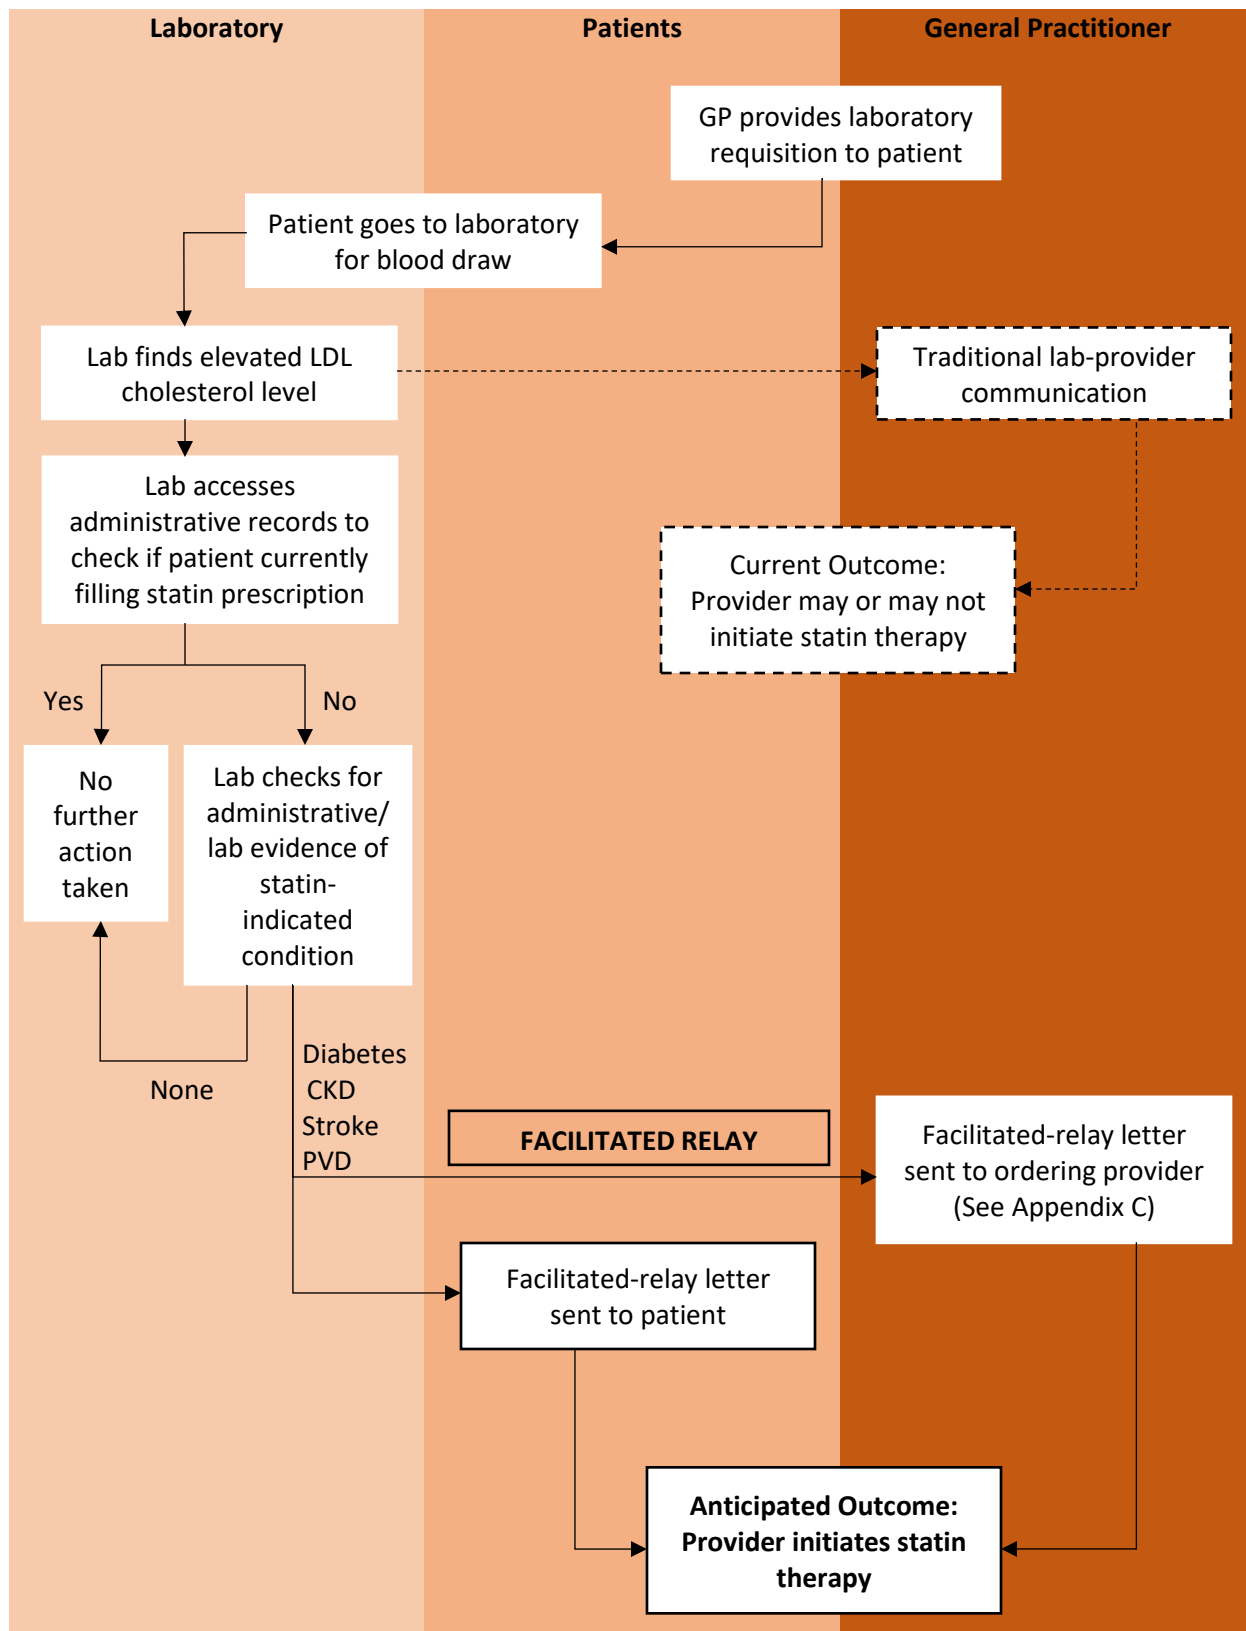

**Figure 1: Laboratory-Based Facilitated-Relay Intervention**  
 Dashed lines: traditional interface between lab and ordering provider

## **Appendix A: Interview Guide for health care professional**

Thank you for agreeing to participate in our interview today. We wish to discuss your experience in managing dyslipidemia (or high cholesterol) in order to better understand how we might help family physicians treat dyslipidemia (or high cholesterol). We have a proposed intervention and would like your assistance in how to enrich it.

### **1. Experience managing dyslipidemia**

Please describe any challenges or difficulties that you experience in identifying and managing patients with dyslipidemia?

- Do you use any resources to guide you in the management of these patients?
  - Canadian Cardiovascular Society Guidelines
  - Diabetes Canada Guidelines
  - TOP guidelines

In addition to measuring a patient's lipids, what are some other parameters that you consider when assessing a patient for dyslipidemia, and how to optimally manage this condition?

### **2. Dyslipidemia-related practices**

In your practice, do you find it helpful to quantify a patient's LDL-cholesterol or get a lipid panel?

If yes,

- Are there certain populations in whom you find this test most helpful?
- What is your chosen method/diagnostic test to do so?
  - Fasting or random lipid profile
    - Total cholesterol
    - HDL-cholesterol
    - LDL-cholesterol
  - ApoB
- How does this information change your clinical practice?
- How often do you repeat cholesterol testing for patients with with conditions that puts them at high risk for cardiovascular disease (i.e. previous clinical cardiovascular disease, diabetes, chronic kidney disease)?

If no,

- Why is it not particularly helpful?
  - Don't know which test to do
  - Don't know how to order it
  - Don't know in whom it is indicated

- Don't know what to do with the results

In thinking about your practice, what proportion of your patients with conditions that put them at high risk for cardiovascular disease (i.e. previous myocardial infarction, stroke, diabetes, and/or chronic kidney disease) have had their lipid profile assessed in the past 12 months?

What are some of the reasons this does not happen (in your practice and in others')?

- Didn't think it was indicated/for whom it is indicated
- Too many things to attend to
- Not perceived to be an important issue amongst all other disease/conditions that FPs manage
- Patient factors (doesn't go for test)

### 3. Intervention

If we wanted to increase the use of statins among people at high risk for cardiovascular disease (i.e. previous clinical cardiovascular disease, diabetes, chronic kidney disease), what might be done? What tools, resources, prompts may help facilitate increased treatment of dyslipidemia?

In your opinion, what type of educational intervention is most effective in disseminating clinical practice guidelines to family physicians? (i.e. conferences, local lectures, treatment recommendations on lab results).

We are considering the use of a facilitated relay strategy, where patient's information from Calgary Laboratory Services is used to identify those who have indications for statin therapy. Those who are not currently filling statin prescriptions at the pharmacy would receive a letter from the lab indicating that they may benefit from statins. They will be encouraged to bring this letter in to discuss this with you.

How would family physicians respond to receiving a letter from the lab prompting them to consider starting their patient on statin treatment?

- What would be the characteristics of such a letter that would make it more likely to succeed?
  - Short/Pictorial/Colorful

Would it be more helpful to have this information specific about one named patient, or rather have an audit of your entire practice that would indicate what proportion of eligible patients with statin-indicated conditions are currently being treated with statins? (i.e. Audit and Feedback)

1  
2  
3 How should such an intervention either on a specific patient or about your entire practice  
4 be received?  
5

- 6 • Mail/Fax/EMR/combo

7  
8  
9 How would such an intervention be processed in your office?

- 10 • Who would open the envelope?
- 11 • What would they do with it? (give it to you, put it in the patient's chart)
- 12 • How likely would you be to see this information?

13  
14  
15  
16 Who should this letter be coming from in order to have it received in the most positive  
17 way possible?  
18

- 19 • A non-clinical academic researcher (Dr. XXXX)
- 20 • Head of the Calgary Laboratory Services (Dr. Christopher Naugler)
- 21 • A lipid specialist (Dr. Sonia Butalia, Alex Leung)
- 22 • An academic family doctor (Dr. Kerry McBrien)
- 23 • A respected community family doctor
- 24 • The lead of Dyslipidemia Guidelines (Dr. Todd Anderson)
- 25 • Dr. Cello Tonelli, Associate Vice-President (Research) at the University of  
26 Calgary
- 27 • Dr. Richard Lewanczuk, Senior Medical Director for Primary Care, Chronic  
28 Disease Management, Community and Rural for Alberta Health Services
- 29 • Someone else

30  
31  
32  
33  
34  
35 Would it be helpful to receive a reminder or follow-up letter?

- 36 • How much later should this be sent, so as to be useful and not annoying?

37  
38  
39 If the intervention provided you with patient-oriented material about this subject, and  
40 asked you to share it with your patients, how would you feel about doing so?

- 41 • What content should be included in this patient-oriented material to enhance statin  
42 use?
- 43 • What format should this material be in? Electronic, hard-copy? How should it be  
44 delivered? Mail, email?
- 45 • Would you share it in a clinical setting?
- 46 • Would you be willing to mail it to patients directly?

47  
48  
49  
50  
51 Do you have any additional comments or suggestions for developing an intervention to  
52 increase the use statins in people at high risk for cardiovascular disease (i.e. previous  
53 clinical cardiovascular disease, diabetes, chronic kidney disease) in primary care?  
54  
55  
56  
57  
58  
59  
60

1  
2  
3 Thank you for participating in today's interview. Using the information you provided, we  
4 will work on developing an intervention to improve the treatment of dyslipidemia in  
5 patients who are at high risk for cardiovascular disease (i.e. previous clinical  
6 cardiovascular disease, diabetes, chronic kidney disease)?  
7  
8

### 9 **Appendix B: Focus Group Guide for patients**

10 Thank you for agreeing to participate in our focus group today. There are many risk  
11 factors for heart attacks and stroke. Today we want to focus on one risk factor being high  
12 cholesterol. High cholesterol is a major risk factor for heart attacks, strokes and  
13 circulatory problems. There are no symptoms of high cholesterol and it is diagnosed by a  
14 lab test that your doctor would order. Importantly, we work for the University of Calgary  
15 and have no relationship with any medication companies.  
16  
17

18 We wish to discuss your experience in managing *cholesterol* with medications in order to  
19 better understand how we might help family physicians (*doctors*) treat high cholesterol.  
20  
21

#### 22 **1. Experience with high cholesterol**

23 Think about the last time your doctor has sent you for a cholesterol test. Did your doctor  
24 talk to you about the results? Treatment? What kind of treatment was discussed (diet,  
25 exercise, a medication)?  
26  
27

28 Put yourself in the position of being told that you need to take a medication for your  
29 cholesterol. What factors would make you more likely to take it? What factors would  
30 make you not want to take it? Reasons, side effects, costs  
31  
32

- 33 • Would you use any resources to help you decide?
  - 34 ○ Doctor
  - 35 ○ Dietician
  - 36 ○ Internet
  - 37 ○ Family, friends
  - 38
  - 39

40 What would you think if your doctor told you that your cholesterol wasn't all that high,  
41 but because of your other health conditions she wanted to start you on a cholesterol  
42 lowering medication to reduce your risk of heart attack and stroke?  
43  
44

45 Do you think it would be helpful to get the actual result of your cholesterol level sent  
46 directly from the lab to you?  
47  
48

49  
50 Currently, cancer screening programs send letters to patients about their results and next  
51 steps. What are your thoughts for something similar for high cholesterol?  
52  
53  
54  
55  
56  
57  
58  
59  
60

1  
2  
3 What about information about recommended treatments and potential side effects?  
4 Would you find this to be invasive of your privacy (i.e. info from the lab about treatment  
5 and not your doctor)?  
6  
7

8  
9  
10 How would you feel about taking a letter with these recommendations to your doctor to  
11 discuss about a medication for high cholesterol?  
12

13  
14 How do you feel your doctor would respond to you bringing this information?  
15  
16

17  
18 What things on the letter would make it helpful?  
19

20 -length, colour, graphics,  
21  
22

23  
24  
25 Who should this letter be coming from in order to have it received in the most positive  
26 way possible?  
27

- 28 • A non-clinical academic researcher (Dr. XXXX)
- 29 • Head of the Calgary Laboratory Services (Dr. Christopher Naugler)
- 30 • A lipid specialist (Dr. Sonia Butalia, Alex Leung)
- 31 • An academic family doctor (Dr. Kerry McBrien)
- 32 • A respected community family doctor
- 33 • The lead of Dyslipidemia Guidelines (Dr. Todd Anderson)
- 34 • Dr. Richard Lewanczuk, Senior Medical Director for Primary Care, Chronic  
35 Disease Management, Community and Rural for Alberta Health Services
- 36 • Someone else  
37  
38  
39

40  
41 Would it be helpful to receive a reminder or follow-up letter?  
42

- 43 • How much later should this be sent, so as to be useful and not annoying?  
44

45 Do you have any additional comments or suggestions for developing an way to increase  
46 the use the treatment of people with high cholesterol?  
47  
48  
49  
50  
51  
52  
53  
54  
55  
56  
57  
58  
59  
60



## Appendix C: Facilitated Relay Letter

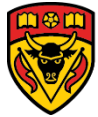

UNIVERSITY OF  
CALGARY

Date: XXXX-XX-XX

Dear Dr. [Physician Last Name],

RE: [Patient Name]

As you may recall, your Primary Care Network is involved in a study with the University of Calgary. This is an investigator-initiated study with public funding from the [*Canadian Institutes of Health Research*].

Dyslipidemia is a major risk factor for myocardial infarction and stroke<sup>1-2</sup>. As you know, in patients like [name], statins are indicated for their dyslipidemia because they are proven to reduce cardiovascular outcomes and mortality<sup>3-4</sup>. Because of numerous randomized controlled trials, guidelines recommend statin use in individuals with history of previous cardiovascular disease, diabetes, or chronic renal failure<sup>5</sup>.

We are writing to you to consider initiating a statin in your patient. We know the importance of the therapeutic relationship that you have with your patients and know that we do not know your patient like you do. The purpose of this letter is to assist in you in your discussion with [name], about using a statin medication.

[Name] may not be taking a statin because of underestimation of their personal risk of cardiovascular disease, fear of side-effects, previous side-effects, or cost. If cost is a concern, compassionate programs are available for several statin medications. Please kindly call our study telephone number to assist in facilitating this.

The most common side effect from statins is muscle aches, and the frequency of statin-induced rhabdomyolysis is very rare (i.e. < 1 in 10,000 patients per year on statins)<sup>6</sup>. Studies suggest that there are several proven methods for managing people who have experienced muscle aches. For those unable to tolerate daily high intensity statins, some statin is still better than none, and the following strategies can be considered:

1. *Reducing the dose of statin.* i.e. Atorvastatin 10-20mg or Rosuvastatin 2.5-5mg<sup>7</sup>.
2. *Trying a low potency statin medication.* Lower potency statins seem to be less strongly associated with muscle aches. Fluvastatin and Pravastatin were much less likely than Simvastatin and Atorvastatin to cause myalgia<sup>8</sup>. For your reference, maximum doses of these low potency statins, and their equivalencies are:

1  
2 Pravastatin 80mg = Atorvastatin 20mg = Rosuvastatin 10mg  
3 Fluvastatin XL 80mg = Atorvastatin 10mg = Rosuvastatin 5mg  
4

- 5  
6 3. *Reducing dose or lengthening administration interval.* Studies have demonstrated that  
7 greater than 70% of patients affected by myalgias were able to tolerate every other day  
8 administration with no recurrence of muscle symptoms<sup>9</sup>.  
9

10 There is a small chance that your patient may have been misclassified with a statin indicated  
11 condition. We sincerely apologize for this and would be most appreciative if you can call or fax us to  
12 let us know.  
13

14  
15 We welcome any questions or comments so please kindly contact us at 403-955-8327 (or fax 403-955-  
16 8249), for more information.  
17

18  
19 Sincerely,  
20 Sonia Butalia MD, FRCPC, MSc and the study team  
21  
22  
23  
24  
25  
26  
27  
28  
29  
30  
31

## 32 References

- 33  
34  
35 1. Yusuf S, Hawken S, Ôunpuu S, et al. *The Lancet*. 2004;364(9438):937-952.  
36 2. O'Donnell MJ, Xavier D, Liu L, et al. *The Lancet*. 2010;376(9735):112-123.  
37 3. Cholesterol Treatment Trialists Collaboration. *The Lancet*. 2010;376(9753):1670-1681.  
38 4. Cholesterol Treatment Trialists Collaborators. *The Lancet*. 2012;380(9841):581-590.  
39 5. Anderson TJ, Grégoire J, Pearson GJ, et al. 2016 Canadian Cardiovascular Society Guidelines  
40 for the Management of Dyslipidemia for the Prevention of Cardiovascular Disease in the Adult.  
41 *Canadian Journal of Cardiology*. 2016;32(11):1263-1282.  
42 6. Graham DJ, Staffa JA, Shatin D, et al. *JAMA*. 2004;292(21):2585-2590.  
43 7. Arca M, Pigna G. *Diabetes, Metabolic Syndrome and Obesity: Targets and Therapy*. 2011;4:155-  
44 166.  
45 8. Bruckert E, Hayem G, Dejager S, Yau C, Bégaud B. *Cardiovascular Drugs and Therapy*.  
46 December 01 2005;19(6):403-414.  
47 9. Bellostta S, Paoletti R, Corsini A. *Circulation*. June 15, 2004 2004;109(23 suppl 1):III-50-III-57.  
48  
49  
50  
51  
52  
53  
54  
55  
56  
57  
58  
59  
60

**Strategies for Enhancing Cholesterol Lowering Medication Use  
Among Patients at High Cardiovascular Disease Risk: Patient and  
General Practitioners' Perspectives on a Facilitated Relay  
Intervention**

Consolidated criteria for reporting qualitative studies (COREQ): 32-item checklist

| No | Item                                                       | Guide questions/<br>description                             | Response           |
|----|------------------------------------------------------------|-------------------------------------------------------------|--------------------|
|    | <b>Domain 1:<br/>Research<br/>team and<br/>reflexivity</b> |                                                             |                    |
|    | Personal<br>Characteristics                                |                                                             |                    |
| 1. | Interviewer/facilitator                                    | Which author/s conducted the interview or focus group?      | Line 137           |
| 2. | Credentials                                                | What were the researcher's credentials? <i>E.g. PhD, MD</i> | Author information |
| 3. | Occupation                                                 | What was their occupation at the time of the study?         | Line 137           |
| 4. | Gender                                                     | Was the researcher male or female?                          | Line 137           |
| 5. | Experience and training                                    | What experience or training did the researcher have?        | Line 137           |

| No                                | Item                                     | Guide questions/<br>description                                                                                                                                 | Response                          |
|-----------------------------------|------------------------------------------|-----------------------------------------------------------------------------------------------------------------------------------------------------------------|-----------------------------------|
|                                   | Relationship with participants           |                                                                                                                                                                 |                                   |
| 6.                                | Relationship established                 | Was a relationship established prior to study commencement?                                                                                                     | Line 138-139                      |
| 7.                                | Participant knowledge of the interviewer | What did the participants know about the researcher? <i>e.g. personal goals, reasons for doing the research</i>                                                 | Not discussed                     |
| 8.                                | Interviewer characteristics              | What characteristics were reported about the interviewer/facilitator? <i>e.g. Bias, assumptions, reasons and interests in the research topic</i>                | Not discussed                     |
| <b>Domain 2:<br/>study design</b> |                                          |                                                                                                                                                                 |                                   |
|                                   | Theoretical framework                    |                                                                                                                                                                 |                                   |
| 9.                                | Methodological orientation and Theory    | What methodological orientation was stated to underpin the study? <i>e.g. grounded theory, discourse analysis, ethnography, phenomenology, content analysis</i> | Qualitative Description – Line 98 |

| No  | Item                         | Guide questions/<br>description                                                           | Response                                                          |
|-----|------------------------------|-------------------------------------------------------------------------------------------|-------------------------------------------------------------------|
|     | Participant selection        |                                                                                           |                                                                   |
| 10. | Sampling                     | How were participants selected? <i>e.g. purposive, convenience, consecutive, snowball</i> | GP – Snowball (line 106-107)<br>Patients – Convenience (line 116) |
| 11. | Method of approach           | How were participants approached? <i>e.g. face-to-face, telephone, mail, email</i>        | Line 106-120                                                      |
| 12. | Sample size                  | How many participants were in the study?                                                  | Line 173<br>Line 186                                              |
| 13. | Non-participation            | How many people refused to participate or dropped out? Reasons?                           | Line 176-177                                                      |
|     | Setting                      |                                                                                           |                                                                   |
| 14. | Setting of data collection   | Where was the data collected? <i>e.g. home, clinic, workplace</i>                         | Line 137<br>Line 142                                              |
| 15. | Presence of non-participants | Was anyone else present besides the participants and researchers?                         | Line 143                                                          |
| 16. | Description of sample        | What are the important characteristics of the sample? <i>e.g. demographic data, date</i>  | Line 174-195                                                      |

| No                                         | Item                   | Guide questions/<br>description                                               | Response                       |
|--------------------------------------------|------------------------|-------------------------------------------------------------------------------|--------------------------------|
|                                            | Data collection        |                                                                               |                                |
| 17.                                        | Interview guide        | Were questions, prompts, guides provided by the authors? Was it pilot tested? | Appendix A& B                  |
| 18.                                        | Repeat interviews      | Were repeat interviews carried out? If yes, how many?                         | No                             |
| 19.                                        | Audio/visual recording | Did the research use audio or visual recording to collect the data?           | Line 146                       |
| 20.                                        | Field notes            | Were field notes made during and/or after the interview or focus group?       | Line 143-144                   |
| 21.                                        | Duration               | What was the duration of the interviews or focus group?                       | Line 142-143                   |
| 22.                                        | Data saturation        | Was data saturation discussed?                                                | Line 140 + limitations section |
| 23.                                        | Transcripts returned   | Were transcripts returned to participants for comment and/or correction?      | No                             |
| <b>Domain 3:<br/>analysis and findings</b> |                        |                                                                               |                                |

| No            | Item                           | Guide questions/<br>description                                                                                                          | Response                 |
|---------------|--------------------------------|------------------------------------------------------------------------------------------------------------------------------------------|--------------------------|
| Data analysis |                                |                                                                                                                                          |                          |
| 24.           | Number of data coders          | How many data coders coded the data?                                                                                                     | Line 156-160             |
| 25.           | Description of the coding tree | Did authors provide a description of the coding tree?                                                                                    | Line 157                 |
| 26.           | Derivation of themes           | Were themes identified in advance or derived from the data?                                                                              | Line 157-158 (inductive) |
| 27.           | Software                       | What software, if applicable, was used to manage the data?                                                                               | Line 164-165             |
| 28.           | Participant checking           | Did participants provide feedback on the findings?                                                                                       | Line 414-415             |
| Reporting     |                                |                                                                                                                                          |                          |
| 29.           | Quotations presented           | Were participant quotations presented to illustrate the themes / findings? Was each quotation identified? e.g. <i>participant number</i> | In-text and Table 3      |
| 30.           | Data and findings consistent   | Was there consistency between the data presented and the findings?                                                                       | Yes                      |

| No  | Item                    | Guide questions/<br>description                                        | Response        |
|-----|-------------------------|------------------------------------------------------------------------|-----------------|
| 31. | Clarity of major themes | Were major themes clearly presented in the findings?                   | Results section |
| 32. | Clarity of minor themes | Is there a description of diverse cases or discussion of minor themes? | Table 2 & 3     |



# BMJ Open

## Strategies for Enhancing the Initiation of Cholesterol Lowering Medication Among Patients at High Cardiovascular Disease Risk: A Qualitative Descriptive Exploration of Patient and General Practitioners' Perspectives on a Facilitated Relay Intervention in Alberta, Canada

|                                 |                                                                                                                                                                                                                                                                                                                                                                                                                                                                                                                                                                                                                                                                                                                                                                                                                          |
|---------------------------------|--------------------------------------------------------------------------------------------------------------------------------------------------------------------------------------------------------------------------------------------------------------------------------------------------------------------------------------------------------------------------------------------------------------------------------------------------------------------------------------------------------------------------------------------------------------------------------------------------------------------------------------------------------------------------------------------------------------------------------------------------------------------------------------------------------------------------|
| Journal:                        | <i>BMJ Open</i>                                                                                                                                                                                                                                                                                                                                                                                                                                                                                                                                                                                                                                                                                                                                                                                                          |
| Manuscript ID                   | bmjopen-2020-038469.R2                                                                                                                                                                                                                                                                                                                                                                                                                                                                                                                                                                                                                                                                                                                                                                                                   |
| Article Type:                   | Original research                                                                                                                                                                                                                                                                                                                                                                                                                                                                                                                                                                                                                                                                                                                                                                                                        |
| Date Submitted by the Author:   | 05-Oct-2020                                                                                                                                                                                                                                                                                                                                                                                                                                                                                                                                                                                                                                                                                                                                                                                                              |
| Complete List of Authors:       | Campbell, David; University of Calgary Cumming School of Medicine, Department of Medicine<br>Lee, Rachele; University of Ottawa<br>McBrien, Kerry; University of Calgary, Family Medicine<br>Anderson, Todd; University of Calgary Cumming School of Medicine, Department of Cardiac Sciences<br>Quan, Hude; University of Calgary, Community Health Sciences<br>Leung, Alexander; University of Calgary Cumming School of Medicine, Department of Medicine<br>Chen, Guanmin; University of Calgary Cumming School of Medicine, Community Health Sciences<br>Lu, Mingshan ; University of Calgary, Economics<br>Naugler, Christopher; University of Calgary, Pathology and Laboratory Medicine; Calgary Laboratory Services,<br>Butalia, Sonia; University of Calgary Cumming School of Medicine, Department of Medicine |
| <b>Primary Subject Heading</b>: | Cardiovascular medicine                                                                                                                                                                                                                                                                                                                                                                                                                                                                                                                                                                                                                                                                                                                                                                                                  |
| Secondary Subject Heading:      | Diabetes and endocrinology, General practice / Family practice, Health services research, Qualitative research, Renal medicine                                                                                                                                                                                                                                                                                                                                                                                                                                                                                                                                                                                                                                                                                           |
| Keywords:                       | QUALITATIVE RESEARCH, GENERAL MEDICINE (see Internal Medicine), Quality in health care < HEALTH SERVICES ADMINISTRATION & MANAGEMENT, Cardiology < INTERNAL MEDICINE, PREVENTIVE MEDICINE                                                                                                                                                                                                                                                                                                                                                                                                                                                                                                                                                                                                                                |
|                                 |                                                                                                                                                                                                                                                                                                                                                                                                                                                                                                                                                                                                                                                                                                                                                                                                                          |

SCHOLARONE™  
Manuscripts



I, the Submitting Author has the right to grant and does grant on behalf of all authors of the Work (as defined in the below author licence), an exclusive licence and/or a non-exclusive licence for contributions from authors who are: i) UK Crown employees; ii) where BMJ has agreed a CC-BY licence shall apply, and/or iii) in accordance with the terms applicable for US Federal Government officers or employees acting as part of their official duties; on a worldwide, perpetual, irrevocable, royalty-free basis to BMJ Publishing Group Ltd ("BMJ") its licensees and where the relevant Journal is co-owned by BMJ to the co-owners of the Journal, to publish the Work in this journal and any other BMJ products and to exploit all rights, as set out in our [licence](#).

The Submitting Author accepts and understands that any supply made under these terms is made by BMJ to the Submitting Author unless you are acting as an employee on behalf of your employer or a postgraduate student of an affiliated institution which is paying any applicable article publishing charge ("APC") for Open Access articles. Where the Submitting Author wishes to make the Work available on an Open Access basis (and intends to pay the relevant APC), the terms of reuse of such Open Access shall be governed by a Creative Commons licence – details of these licences and which [Creative Commons](#) licence will apply to this Work are set out in our licence referred to above.

Other than as permitted in any relevant BMJ Author's Self Archiving Policies, I confirm this Work has not been accepted for publication elsewhere, is not being considered for publication elsewhere and does not duplicate material already published. I confirm all authors consent to publication of this Work and authorise the granting of this licence.

1  
2  
3 **Strategies for Enhancing the Initiation of Cholesterol Lowering Medication Among Patients at High**  
4 **Cardiovascular Disease Risk: A Qualitative Descriptive Exploration of Patient and General**  
5 **Practitioners' Perspectives on a Facilitated Relay Intervention in Alberta, Canada**  
6

7 David J.T. Campbell, MD PhD FRCPC<sup>1,2,3</sup>

8 Rachelle C.W. Lee, MSc<sup>4</sup>

9 Kerry A. McBrien, MD MPH CCFP<sup>2,5</sup>

10 Todd J. Anderson, MD PhD FRCPC<sup>3</sup>

11 Hude Quan, MD PhD<sup>2</sup>

12 Alexander A.C. Leung, MD MPH FRCPC<sup>1,2,3</sup>

13 Guanmin Chen, MD PhD<sup>2</sup>

14 Mingshan Lu, PhD<sup>2,6</sup>

15 Christopher Naugler, MD FRCPC<sup>2,7</sup>

16 Sonia Butalia, MD MSc FRCPC<sup>1,2</sup>

17  
18  
19  
20 1 – Department of Medicine, Cumming School of Medicine, University of Calgary, Calgary, AB, Canada

21 2 – Department of Community Health Sciences, Cumming School of Medicine, University of Calgary,  
22 Calgary, AB, Canada

23 3 – Department of Cardiac Sciences, Cumming School of Medicine, University of Calgary, Calgary, AB,  
24 Canada

25 4 – Department of Innovation in Medical Education, Faculty of Medicine, University of Ottawa, Ottawa,  
26 ON, Canada

27 5 – Department of Family Medicine, Cumming School of Medicine, University of Calgary, Calgary, AB,  
28 Canada

29 6 – Department of Economics, Faculty of Arts, University of Calgary, Calgary, AB, Canada

30 7 – Department of Pathology & Laboratory Medicine, Cumming School of Medicine, University of  
31 Calgary, Calgary, AB, Canada  
32  
33

34 Correspondence:

35 Dr. David J.T. Campbell

36 TRW 3E33, 3280 Hospital Dr NW

37 Calgary, AB, Canada T2N 4Z6

38 [dcampbel@ucalgary.ca](mailto:dcampbel@ucalgary.ca)

39 403-210-9511  
40  
41

42 Word count: Main text (4861 words), abstract (283 words), 3 tables, 1 figure, 3 appendices  
43  
44  
45  
46  
47  
48  
49  
50  
51  
52  
53  
54  
55  
56  
57  
58  
59  
60

**ABSTRACT**

**Objective:** The objective of our study was to explore the perspectives of patients and general practitioners (GPs) regarding interventions to increase initiation of cholesterol lowering medication (or statins), including a proposed laboratory-based facilitated relay intervention.

**Design:** Qualitative descriptive study using interviews and focus groups for data collection, and thematic analysis for data analysis.

**Setting:** Primary care providers and patients in Calgary, Alberta, Canada.

**Participants:** 17 General Practitioners with primarily community-based, non-academic practices with at least 1 year of practice experience participated in semi-structured interviews. 14 patients at high risk of cardiovascular disease participated in focus groups.

**Main outcome measures:** Exploration of strategies that might be used to enhance the prescription of, and adherence to statin therapy for patients with statin-indicated conditions.

**Results:** GPs proposed a variety of interventions to improve statin prescription, including electronic record audit solutions, GP directed education and patient-oriented campaigns. Patients expressed that they may benefit from being provided access to their laboratory test results, as well as targeted education. Both parties provided positive feedback on the proposed laboratory-based facilitated relay intervention, while pointing out areas for improvement. Notably, GPs were concerned that the patient-directed component of the intervention might jeopardize therapeutic relationships, and patients were concerned about accidental disclosure of personal health information. Important considerations for the design of facilitated relay messaging should include brevity, simplicity and the provision of contact information for inquiries.

**Conclusions:** GPs and patients described several suggestions for increasing statin initiation and welcomed the proposal of a laboratory-based facilitated relay strategy. These findings support further testing of this intervention which may enhance GPs' ability to successfully engage patients in cardiovascular risk reduction through statin therapy.

**Keywords:** focus groups, qualitative research, interviews, statins, facilitated relay

## Strengths & Limitations of this Study

- This is a qualitative study, with relatively few participants – therefore we cannot say definitively if the views represented here represent those of all patients and prescribers.
- We sampled physician participants to the point of saturation, which means that we are confident the views represented here span the breadth of those held by physicians.
- The patient sample we recruited may not be representative of the broader population, as many of them had previously stated an interest in quality improvement and research – and therefore may be attuned to the importance of preventive therapies more than other members of the general public. Additionally, this group was not sampled to saturation, as opposed to the physician participants.
- Given the context-dependent nature of qualitative data, the applicability of these findings to other settings is not certain.
- One of the major strengths of this study is the depth and richness of the qualitative data that were collected. By asking questions in an open-ended manner, we were able to record detailed accounts and opinions.

## INTRODUCTION

Vascular disease, including coronary artery disease, peripheral artery disease, and cerebrovascular disease, remains among the leading causes of mortality worldwide (1). A class of medications, HMG-CoA reductase inhibitors, commonly known as statins, have proven to be effective for lowering the risk of vascular events (2). Individuals who have previously had vascular disease (i.e. secondary prevention) derive a greater absolute risk reduction from statins than those who have never had vascular disease (i.e. primary prevention) (3). There are some individuals who have never had vascular disease, such as those with diabetes or chronic kidney disease, who have also been shown in randomized controlled trials to benefit from therapy (4-6). Despite over 30 years of clinical use, efficacy, safety and cost-effectiveness data (7, 8), only 23% to 55% of individuals who would benefit take this medication and fewer than half of individuals are treated to target cholesterol levels (7, 9-11). There is substantial unwanted variability in dyslipidemia management, and health system intervention is required to promote equitable treatment (12, 13). The lack of statin treatment for patients with indicated conditions results in significant excess morbidity and mortality. In Canada, specifically, if all patients with indications for statins were treated, this would result in nearly 40,000 averted cardiovascular events annually (14). In the United States, 13% of cardiovascular deaths could be prevented with perfect statin adherence among patients at high cardiovascular risk (15).

Physicians and patients face numerous barriers when it comes to prescribing and adhering to statin therapy, from the providers perspective this includes lack of knowledge, conflicting clinical guidelines, lack of systems to identify patients who should be taking statins (16). On the other hand, patients often experience or fear side effects or are simply averse to taking additional medications (16). Furthermore, patients that face social disadvantages such as low income, lack of health insurance, and minority race are more likely to not use statins (17). A large US-based survey found that side effects were common and that many former statin users were unsatisfied with the explanation provided by their prescriber about the importance of the medication (18). Providers need resources to help them provide this counselling to patients and to arm them with strategies to mitigate common statin side effects, like muscle aches (19).

1  
2  
3 83 There are clearly many challenges that lead to the observed clinical treatment gap for patients who have  
4 84 indications for statin treatment. However, some studies have shown that such treatment gaps, in  
5 85 related conditions like hypertension, can be closed using quality improvement strategies (20-22).  
6 86 Integrated quality improvement strategies that target both patients and healthcare providers are more  
7 87 likely to achieve quality indicators than strategies which only target one aspect in isolation (21). One  
8 88 such strategy is facilitated relay. Facilitated relay is a quality improvement strategy whereby information  
9 89 about individual patients is sent directly to healthcare providers through a means other than the usual  
10 90 clinical encounter (23). Despite the establishment and promotion of facilitated relay and other quality  
11 91 improvement strategies, there remain significant treatment gaps in hypertension (24) and other chronic  
12 92 conditions (25). Furthermore, while facilitated relay has been shown to be effective in improving a  
13 93 number of cardiovascular risk factors (21, 26), it remains among the least commonly used quality  
14 94 improvement strategies (27) and has not been explored in the management of dyslipidemia.  
15 95

16 96 For an intervention to have the potential to yield maximum impact, it is important to qualitatively seek  
17 97 the input of key stakeholders prior to the application of any intervention (28). This allows for the  
18 98 development of a higher quality intervention, rather than one that relies on physician feedback alone  
19 99 (29). As such, the objective of our study was to explore the perspectives of both patients and general  
20 100 practitioners' (GPs) regarding interventions to increase cholesterol lowering medication (or statin)  
21 101 prescription, including specific feedback on a proposed laboratory-based facilitated relay intervention.  
22 102

## 23 103 **METHODS:**

### 24 104 **Study Design**

25 105  
26 106  
27 107 We conducted a qualitative descriptive study (28) to explore patients' and GPs' perspectives on  
28 108 interventions to increase initiation of statins for cardiovascular risk reduction and treatment of high  
29 109 cholesterol in those at high cardiovascular risk. In addition to generic thoughts on potential hypothetical  
30 110 interventions, we specifically sought directed feedback and perceptions on the acceptability of the  
31 111 proposed facilitated relay intervention from both patients and GPs (30). We used the consolidated  
32 112 criteria for reporting qualitative research (COREQ) as the reporting framework for this study (31).  
33 113

### 34 114 **Proposed Intervention**

35 115  
36 116 We drew from behaviour change theory to develop a facilitated relay intervention to increase statin  
37 117 prescriptions (32-34) (Figure 1). Our proposed intervention partners with our province's single unified  
38 118 laboratory system to identify individuals who have elevated cholesterol levels, statin-indicated  
39 119 conditions, and who are not currently filling prescriptions for statins. Our lab system has access to  
40 120 province-wide administrative databases, including labs, pharmacy dispensations, and hospitalization  
41 121 data. For every elevated LDL-cholesterol level, the lab would have an algorithm that would check the  
42 122 patients' records for evidence of statin-indicated conditions (administrative markers of myocardial  
43 123 infarction, stroke, diabetes, or chronic kidney disease), and would then identify if the patient has  
44 124 recently filled a statin prescription. This is possible because of province-wide, linkable databases. For  
45 125 patients who are not filling statins, but who should be, their GP (who had ordered the cholesterol level)  
46 126 and the patient, will then each receive a letter outlining the indication for treatment and the potential to  
47 127 benefit from statin therapy. The patient letter will encourage them to speak to their GP, and the GP  
48 128 letter will encourage them to make an appointment to discuss directly with the patient - both with the  
49 129 objective to initiate or renew statin prescriptions. We felt that it was important to include patients in the  
50  
51  
52  
53  
54  
55  
56  
57  
58  
59  
60

130 facilitated relay to empower them in discussions with their GP and to enable shared decision-making  
131 (35), which has been demonstrated to improve adherence with statins (36).

132

### 133 **Participant Recruitment**

134

135 *General Practitioners:* We recruited general practitioners to participate in individual interviews, using a  
136 snowball sampling approach. First, we asked key stakeholders in areas of primary care, endocrinology,  
137 nephrology and cardiology affiliated with the university medical centre, to recommend community-  
138 based (non-academic) GPs to participate in the study. Individuals were then contacted by telephone and  
139 email with a formal invitation to participate. GPs who met the following criteria were enrolled: (1)  
140 currently practicing in community general practice settings; and, (2) at least one year of experience  
141 working as a GP in independent practice. We sampled participants purposively based on several key  
142 demographic characteristics in order to achieve representation across a range of ages, genders and  
143 practice types.

144

145 *Patients:* We recruited patients who would qualify as recipients of the proposed intervention.  
146 Specifically, we were interested in recruiting those at high risk of cardiovascular disease, who self-  
147 reported a prior history of high cholesterol, preferably with co-existing vascular disease (myocardial  
148 infarction, stroke or peripheral vascular disease), diabetes, or chronic kidney disease. Using a  
149 convenience sampling approach, we invited patients who were part of an established advisory panel and  
150 previously agreed to be contacted about research opportunities for study participation (37, 38). In  
151 addition, patients were recruited using poster advertisements placed throughout the academic health  
152 sciences centre and in various clinical care areas where care is provided to patients with diabetes, heart  
153 disease and kidney disease.

154

### 155 **Data Collection**

156

157 Data was collected from September 2018 to November 2018 using both qualitative semi-structured  
158 interviews (with GPs) and focus groups (with patients). We chose focus groups for patients as rich  
159 personal disclosures are more likely to occur in this setting than in individual interviews (39). However,  
160 we purposely used individually scheduled interviews to offset potential aversion to focus groups by  
161 community-based GPs due to their competing clinical demands. Furthermore, we wanted to recruit  
162 from both urban and rural locales which is more challenging to do in a focus group.

163

164 *Question Guides:* Both focus groups and interviews were guided by question guides (Appendix A & B)  
165 which were developed based on a review of the literature (40, 41) and discussion with the research  
166 team. These were designed so that they initially asked study participants what they thought would be  
167 effective strategies or interventions to improve statin uptake (i.e. prescribing, patient use and  
168 adherence). After they had given their unprompted views, participants were then given a brief  
169 explanation of facilitated relay, the specifics of the proposed intervention (Figure 1), and they were  
170 shown a copy of the proposed intervention letter for GPs (Appendix C). After briefing participants on the  
171 principles and practices of facilitated relay and showing them our preliminary documents for the  
172 intervention, we asked them to provide feedback on this proposed intervention.

173

174 *Provider Interviews:* All interviews were conducted in-person (in clinician offices) or via telephone, by a  
175 female trained research assistant (RCWL) with oversight by experienced study team members. Physician  
176 interviews were continued until the point of theoretical saturation when no new information emerged

1  
2  
3 177 from the interviews (42). Because the research objective was relatively focused, interviews were brief  
4 178 and lasted approximately 30 to 45 minutes.

5 179  
6 180 *Patient Focus Groups:* None of the study team were acquainted with or involved in the clinical care of  
7 181 the patients who participated. We convened two focus groups in our academic medical centre which  
8 182 each lasted approximately 90 minutes. No one but researchers (including 1 facilitator and 2 field-note  
9 183 takers) and participants were present. Focus group facilitators tried to ensure that there were no  
10 184 dominant members and provide all participants with equal opportunity to voice their opinions.

11 185  
12 186 Interviews and focus group proceedings were digitally audio-recorded and transcribed verbatim by a  
13 187 professional transcriptionist. Field notes were recorded to inform data analysis. All data were  
14 188 anonymized and stored securely. Signed informed consent was received from each study participant.  
15 189 Gift cards were provided to all participants. Ethics approval was granted from the University's Health  
16 190 Research Ethics Board.

17 191

## 18 192 **Data Analysis**

19 193

20 194 Analysis was completed using conventional qualitative content analysis (43), a method of interpreting  
21 195 interview data with the goal of describing the phenomenon of interest. Transcripts for the initial three  
22 196 interviews were reviewed by three team members (DJTC, RCWL and SB), with the objective of  
23 197 inductively establishing a preliminary coding template that was used for subsequent data analysis. All  
24 198 transcripts were then analyzed by two reviewers (DJTC and RCWL). Codes were generated from the  
25 199 interview data and systematically applied to identify themes and patterns. The process was iterative,  
26 200 reflexive, and interactive as continual data collection and analysis shaped each other. For example, code  
27 201 titles or definitions identified based on earlier interviews were modified according to the data collected  
28 202 during subsequent interviews. The team met together to review the coding to elicit discussion about the  
29 203 coding strategy and attempted to achieve consensus to resolve coding discrepancies. NVivo 12  
30 204 (Doncaster, Australia) qualitative data analysis software was used to facilitate the coding process.

31 205

## 32 206 **Patient and public involvement**

33 207

34 208 Patient partners and family members from the Libin Cardiovascular Institute's established patient and  
35 209 family member advisory group (44) voiced that *prevention* was one of their top research priorities for  
36 210 cardiovascular health. This work is related to prevention of cardiovascular disease. Patients were  
37 211 included in focus groups.

38 212

## 39 213 **RESULTS**

40 214

41 215 In total, we eventually reached out to 27 GPs to invite them to participate, 4 declined to participate, 4  
42 216 didn't respond to the invitation, 19 were scheduled for interviews, with 2 cancelling. We reached  
43 217 saturation after having completed 17 individual GP interviews (Table 1a). The majority were women  
44 218 (88%) with 65% having graduated from medical school within the last ten years. All GPs spent more  
45 219 than 50% of their time in clinical practice, most were in urban centers within Primary Care Networks  
46 220 (PCNs). PCNs are networks of GPs that share interdisciplinary resources to enhance the delivery of  
47 221 primary care within geographical regions (45); they are associated with improved chronic disease care  
48 222 and outcomes(46).

49 223

50 224 **Table 1a.** Descriptive statistics for General Practitioners (n = 17).



| Physician characteristics                                                                                                     | Total (%)                 |
|-------------------------------------------------------------------------------------------------------------------------------|---------------------------|
| Age (years)                                                                                                                   |                           |
| < 40                                                                                                                          | 13 (76)                   |
| 40 - 60                                                                                                                       | 4 (24)                    |
| Gender                                                                                                                        |                           |
| Man                                                                                                                           | 2 (12)                    |
| Woman                                                                                                                         | 15 (88)                   |
| Years of primary care practice                                                                                                |                           |
| < 10                                                                                                                          | 14 (83)                   |
| 10 – 20                                                                                                                       | 3 (18)                    |
| Years since medical school graduation                                                                                         |                           |
| < 10                                                                                                                          | 11 (65)                   |
| ≥10                                                                                                                           | 6 (35)                    |
| Primary Care Network membership                                                                                               |                           |
| Yes                                                                                                                           | 15 (88)                   |
| No                                                                                                                            | 2 (12)                    |
| Location of primary care practice                                                                                             |                           |
| Urban                                                                                                                         | 13 (76)                   |
| Rural                                                                                                                         | 4 (24)                    |
| Focused practice interest                                                                                                     |                           |
| Yes*                                                                                                                          | 9 (53)                    |
| No                                                                                                                            | 8 (47)                    |
| Clinical practice last 12 months                                                                                              |                           |
| Estimated number of patients at high CVD risk                                                                                 |                           |
| < 20                                                                                                                          | 1 (6)                     |
| 20 to 99                                                                                                                      | 7 (41)                    |
| ≥100                                                                                                                          | 9 (53)                    |
| Use of endocrinology consultation services                                                                                    |                           |
| Yes                                                                                                                           | 5 (29)                    |
| No                                                                                                                            | 12 (71)                   |
| Use of cardiology consultation services                                                                                       |                           |
| Yes                                                                                                                           | 10 (59)                   |
| No                                                                                                                            | 7 (41)                    |
| Use of nephrology consultation services                                                                                       |                           |
| Yes                                                                                                                           | 3 (18)                    |
| No                                                                                                                            | 14 (82)                   |
| Proportion of patients in their practice who would be considered high risk on the basis of cardiovascular risk factors (n=14) | Mean: 32%<br>Range 10-75% |
| Proportion of high-risk patients in their practice who have a current LDL-level on file (n=9)                                 | Mean: 82%<br>Range 70-90% |

225 \* Focused practice, or special interest types: care of the elderly (n = 2), emergency medicine (n = 1),  
 226 urgent care (n = 1), refugee medicine (n = 1), obstetrics (n = 2), indigenous health (n = 2), lactation (n =  
 227 1).

228  
229  
230 Our patient focus groups had 8 and 6 participants, respectively (Table 1b). There was a range of ages  
231 represented among patients, with a similar number of men and women. Nearly all had a general  
232 practitioner and were also followed by medical specialist(s). The conditions represented in our patient  
233 group were diabetes, history of myocardial infarction and elevated cholesterol level; none reported a  
234 history of stroke, chronic kidney disease, or peripheral arterial disease.

235  
236 **Table 1b.** Descriptive statistics for patient participants based on self-report (n = 14).

| Patient characteristics                              | Total (%) |
|------------------------------------------------------|-----------|
| Age (years)                                          |           |
| < 40                                                 | 2 (15)    |
| 40 - 60                                              | 5 (39)    |
| > 60                                                 | 6 (46)    |
| Gender                                               |           |
| Men                                                  | 6 (46)    |
| Women                                                | 7 (54)    |
| Chronic condition qualifying as "high CVD risk"      |           |
| High cholesterol only                                | 3 (23)    |
| Diabetes only                                        | 6 (46)    |
| Myocardial infarct (MI) only                         | 1 (8)     |
| Diabetes & MI                                        | 3 (23)    |
| Has a primary care provider                          |           |
| Yes                                                  | 12 (92)   |
| No                                                   | 1 (8)     |
| Followed by a medical specialist                     |           |
| Yes                                                  | 10 (77)   |
| No                                                   | 3 (23)    |
| Self-reported awareness of high cholesterol levels   |           |
| Yes                                                  | 11 (85)   |
| No                                                   | 2 (15)    |
| Current use of statin medication                     |           |
| Yes                                                  | 6 (46)    |
| If not, had spoken with physicians about statins     | 3 (23)    |
| If not, had not spoken with physicians about statins | 4 (31)    |

\*Note one participant did not complete a demographic questionnaire

237

238

### 239 **General suggestions for potential interventions**

240

241 Several themes arose regarding interventions to improve statin initiation during the unprompted  
242 portion of the interviews (Table 2). GPs described that statin prescribing may be improved by: (1)  
243 enhancing aspects of physician education to promote appropriate statin prescribing; and, (2)  
244 implementation of support tools to help physicians in decision-making and identification of patients for  
245 whom statins are indicated. In addition, patients suggested that having access to their own laboratory  
246 results may enable them to be more effective self-advocates.

247

**Table 2.** General suggestions by general practitioners and patients to increase initiation of statins

|           |                                       |                                                                                                                                                                                                                                                                                                                                                                                                                                                                                                                                                                                                                                                                                                                                                                                                                                                                                                               |
|-----------|---------------------------------------|---------------------------------------------------------------------------------------------------------------------------------------------------------------------------------------------------------------------------------------------------------------------------------------------------------------------------------------------------------------------------------------------------------------------------------------------------------------------------------------------------------------------------------------------------------------------------------------------------------------------------------------------------------------------------------------------------------------------------------------------------------------------------------------------------------------------------------------------------------------------------------------------------------------|
| Providers | Treatment of specific Sub-populations | <p>Patients with chronic kidney disease:<br/> <i>"I struggle with the GFRs [glomerular filtration rate] – knowing when it would be safe, when it wouldn't be safe. I do get confused as to the dosing based on GFR."</i> (GP-05)</p> <p>Patients who previously experienced side effects with statin(s):<br/> <i>"I have one strategy but if somebody is still like 'no, it's completely not tolerable for me' then I don't know what the next step is after that."</i> (GP-13)</p> <p>Elderly patients:<br/> <i>"...getting some better understanding about the elderly. Are there any contraindications to starting on statin therapy? Is there one statin that may be more beneficial than another?"</i> (GP-10)</p> <p>Patients with hypertriglyceridemia:<br/> <i>"I always find it hard to know what to do with triglycerides... more education around how to manage those [patients]."</i> (GP-15)</p> |
|           | Treatment to Targets *                | <p><i>"Most people in my office are confused about what we are doing in terms of treating to the target of 2 mmol/L, because the cardiologist is still sending consults about that, but then we have these family medicine evidence-based groups saying that targets don't matter."</i> (GP-02)</p> <p><i>"I know the TOP [Towards Optimized Practice] guidelines don't necessarily correlate with CCS [Canadian Cardiovascular Society] guidelines, so there are several schools of thought"</i>. (GP-09)</p> <p><i>"There's no real way to unify the guidelines, but to have an education session on why they're different and how to approach it so maybe you'll break down patient populations that fit better with one guideline versus another"</i>. (GP-08)</p>                                                                                                                                        |
|           | Preferred modality of Education       | <p><i>"we have a lot of drug reps [representatives] coming to town, so it would be great to have more [education] that was not pharma, absolutely"</i>. (GP-04)</p>                                                                                                                                                                                                                                                                                                                                                                                                                                                                                                                                                                                                                                                                                                                                           |
|           | EMR-based tools                       | <p><i>"One thing that would be helpful for me is if there was some automatic flag that came when I saw a patient that would alert to the fact that their treatment is not optimized for their conditions"</i>. (GP-06)</p>                                                                                                                                                                                                                                                                                                                                                                                                                                                                                                                                                                                                                                                                                    |
| Patients  | Laboratory Results                    | <p><i>"I would like to get a copy, in addition to the doctor. I can do with it what I want"</i> (Pt-09)</p> <p><i>"It gets you questioning things so that you can come back to your doctor and say 'I saw these numbers, what does that mean? What do I need to do?'"</i> (Pt-02)</p>                                                                                                                                                                                                                                                                                                                                                                                                                                                                                                                                                                                                                         |

|  |                    |                                                                                                                             |
|--|--------------------|-----------------------------------------------------------------------------------------------------------------------------|
|  | Enhanced education | <i>“What if somebody was going regularly to a lab, and a clinician sort of goes: ‘How are you doing on this?’”. (Pt-08)</i> |
|--|--------------------|-----------------------------------------------------------------------------------------------------------------------------|

248 EMR: electronic medical record

249 \* Specialist guidelines, the 2016 Canadian Cardiovascular Society guideline (47) advocates that patients  
 250 at high risk (based on risk calculators) or those with ‘statin-indicated conditions’ (defined as diabetes,  
 251 chronic kidney disease, or preexisting vascular disease be treated with statin therapy to achieve a target  
 252 LDL-c level of < 2.0 mmol/L. GP Guidelines, the 2015 TOP Alberta Guideline (48) encourages GPs to treat  
 253 high risk patients with moderate-to-high intensity statins and should not repeat lipid levels, or attempt  
 254 to treat to a fixed target.

255

256

### 257 1) General practitioner *education*:

258

259 Nearly all GPs highlighted that there are general areas of knowledge that could be bolstered in order to  
 260 enhance statin prescription. One of the main content areas in which they sought enhanced education  
 261 related to the treatment of specific patient sub-populations, in particular those with chronic kidney  
 262 disease, patients who have had prior statin intolerance/side-effects, elderly patients, and those with  
 263 other concurrent lipid disorders (i.e. hypertriglyceridemia).

264

265 Whether providers should be treating patients to a specific cholesterol level was a major source of  
 266 confusion. They frequently referenced receiving conflicting advice, including a contradiction in clinical  
 267 practice guidelines(49), some of which advocate for a ‘fire and forget’ approach(8, 50), while  
 268 Canadian(7) and European(51) specialist guidelines recommend a ‘treat-to-target’ approach(7).

269

270 Regarding the modality of education sessions, most preferred in-person education sessions delivered at  
 271 their clinics and delivered by someone who did not have clear conflicts of interest with pharmaceutical  
 272 companies. Many GPs also suggested the use of handouts, tools or algorithms to simplify their decision-  
 273 making process.

274

### 275 2) General practitioner *tools*

276

277 In addition to education, several GPs suggested that the use of automated tools would facilitate their  
 278 prescribing of statins. Most felt that they would benefit from optimizing the use of their electronic  
 279 medical records (EMR) to ‘flag’ individuals who were at high cardiovascular risk or had elevated  
 280 cholesterol levels. Other GPs spoke of wishing for a ‘running list’ of eligible patients, while some  
 281 mentioned using an employee or contractor designated as a panel manager to perform these tasks.

282

### 283 3) *Patient results and information*

284

285 Many patients independently indicated that they would like to have access to their lipid test results,  
 286 without needing to rely on this being conveyed to them by their general practitioner. Some patients also  
 287 suggested that providing them with their own results might reduce the frequency of unnecessary follow-  
 288 up visits; and as a result, alleviate related financial burden on the healthcare system. Doing so was also  
 289 thought to help foster patient engagement with their GP.

290

291 Patients also felt that having greater access to information about cholesterol and treatment might  
 292 facilitate more patients being on statin therapy. Suggestions were made to deliver this through  
 293 enhanced patient-facing materials (i.e. brochures), as well as pharmacists or lab technicians who were

294 able to discuss results and treatment options. Further information about patient education, shared  
295 decision-making, and clinical decision support tools are described in our other report from this work  
296 (16).

297

### 298 **Feedback on the proposed facilitated relay intervention**

299

300 Emerging themes regarding our proposed intervention were organized into four major categories: (1)  
301 general feedback and impression; (2) suggested changes; (3) intervention details; and, (4) workflow  
302 processing considerations.

303

#### 304 *1) General feedback and impression*

305

306 General practitioners responded to the proposed intervention with strongly positive feedback (Table 3),  
307 which included stating that they found the information to be helpful and direct. They generally felt that  
308 the letter was written in a clear fashion and with a respectful tone. Several mentioned that the  
309 information provided them with reassurance and credibility in making recommendations to their  
310 patients.

311

312 GPs also voiced some questions and potential concerns after hearing about our proposed intervention.  
313 These concerns included whether the introduction of a facilitated relay intervention might increase their  
314 workload, lead to possible disclosure to patients of new diagnoses of conditions that qualified them as  
315 high risk (i.e. diabetes), and pose a threat to their therapeutic relationships with patients. In addition,  
316 logistical issues around how the letter will be best delivered to ordering providers and patients were  
317 raised as concerns.

318

319 Patients generally felt that bringing their facilitated relay letter to a scheduled appointment would be  
320 positive in their relationship by providing structure to the follow-up encounter, holding GPs to account,  
321 and enhancing patient-provider communication. Even though most were generally positive, some  
322 patients expressed concern about the facilitated relay intervention, including the possibility for privacy  
323 breaches and increasing patient anxieties.

324

#### 325 *2) Suggested information to remove or add*

326

327 We asked GPs specifically what they would like to see changed in the preliminary materials shown.  
328 Almost unanimously, they suggested that the letter would be more appreciated if it the two-page  
329 document were shortened to fit on one page. Several participants suggested removing the references,  
330 mention of clinical studies, and guideline citations to make it more reader-friendly. There was also a  
331 preference voiced for revising the introductory paragraphs to have direct relevance to individual  
332 patient(s):

333

334 *"I'm going to read it for sure, but then when you start to read it, people might put it down and say*  
335 *'oh this is a study intervention', [but] if you have the first thing at the very top: 'you know this person*  
336 *has been identified as being at risk' – then it's about the patient rather than being about the*  
337 *studies". (GP-16)*

338

339 A few GPs voiced opinions that specific additions could be made to improve the letter's utility. These  
340 suggestions included adding: information about health behavior change (*"the whole picture, as opposed*  
341 *to just medication"* (GP-04)); adding contact information for a specialist; and details about how/why a

1  
2  
3 342 particular individual was flagged as eligible for the facilitated relay intervention: *"It would be helpful if I*  
4 343 *got a name, condition and then the statin-indicated condition, and where the condition was pulled*  
5 344 *from"*. (GP-01)  
6  
7 345

8 346 Patient feedback was notable for also suggesting that the intervention provide contact information, in  
9 347 case they have further questions about interpreting their results: *"back that up with a helpline for*  
10 348 *somebody that doesn't know what the [results] mean"* (Pt-10). Similar to physicians, patients expressed  
11 349 a strong preference for brevity: *"If I have to go through 14 pages of information to figure out what that*  
12 350 *means, I'm sorry, I don't have time for that"* (Pt-07).  
13 351

14 352 However, numerous patients also stressed the importance of not only providing results or diagnoses,  
15 353 but also giving some basic education and an action plan to follow.  
16 354

### 17 355 3) Intervention details

18 356

19 357 In addition to general feedback, we also explicitly asked GPs whether they would prefer to receive  
20 358 information about their patient in the form of facilitated relay (individual letter for each patient  
21 359 identified) or 'audit and feedback' (summary report including a group of their patient panel). A summary  
22 360 list or report (audit and feedback) was preferred by roughly 2/3 of the general practitioners interviewed.  
23 361 Regarding receiving letters for each patient, participants stated:  
24 362

25 363 *"this is going to get tiresome very quickly"* (GP-05)  
26 364

27 365 *"Am I going to get this letter 20 times? I'm probably just going to read it once"* (GP-03)  
28 366

29 367 *"[a list would] decrease paper burden, decrease the chance of it getting misplaced"*. (GP-13)  
30 368

31 369 While the 'audit and feedback' approach was more popular, some GPs were clearly in favor of facilitated  
32 370 relay: *"I can't even think of the amount of work it would take to do it patient-specific. I'd love it. Sure go*  
33 371 *for it, if you have the means to do it, then why not?"* (GP-10)  
34 372

35 373 We also asked pointedly about how providers would feel about receiving a follow-up reminder from the  
36 374 study team, if patients had not filled the prescription as recommended in the initial letter. The response  
37 375 was split with roughly half of the general practitioners stating that a reminder would not be necessary.  
38 376

39 377 Those who felt a reminder would be acceptable generally agreed that a 6 month window should be  
40 378 sufficient to ascertain whether or not the patient would have started on therapy: *"There are people that*  
41 379 *have a three-month wait list time, you may have to pick an interval more like six-months to appeal to the*  
42 380 *masses..."*. (GP-13)  
43 381

44 382 Most patients felt that they would benefit from receiving a follow-up reminder. After considerable  
45 383 discussion amongst the groups, consensus was achieved that follow-up should not happen prior to four  
46 384 months, and possibly even as long as six months after the initial contact. One participant stated: *"close*  
47 385 *enough that I vaguely remember that I meant to do something with that, but not a few weeks later, [so]*  
48 386 *it's not irritating"*. (GP-17)  
49 387  
50  
51  
52  
53  
54  
55  
56  
57  
58  
59  
60

388 We also asked patients if they had a preference for who had signed the letter. Most felt that having  
 389 letters come from a local specialist in cardiology or endocrinology would be preferable to having them  
 390 signed by another GP.

391  
 392 *4) Workflow processing considerations (General practitioners only)*

394 To each GP we asked specific details about how our intervention letter would be received in their offices  
 395 and what would happen upon receipt. The majority stated that such a letter would be opened and  
 396 processed by their front-desk staff. One participant clarified that the information on the envelope would  
 397 determine who opened it: *"if it's addressed to me then it will come to me, if it has a patient name for*  
 398 *me, then it goes through our document people [who file it]"*. (GP-09)

400 Once the letter has been opened, different offices employed a variety of different processes. In many  
 401 practices, it would be given directly to the GP; while in others it would be scanned directly into a  
 402 patient's file in an electronic medical record, yet in others, the hardcopy would be filed in a patient's  
 403 chart.

405 In terms of the preferred delivery modality, most GPs felt that electronic delivery directly via the EMR  
 406 platform would be the preferred method of receiving the intervention. However, a number still felt that  
 407 conventional delivery via paper mail or fax would be preferable. Even those who expressed a preference  
 408 for conventional delivery, many elaborated that such letters would often be scanned into a patient's  
 409 electronic file: *"if it was to come by mail or fax, then they have to scan it onto the computer"* (GP-11). A  
 410 few GPs described systems which can do this process automatically: *"our office works with a new web*  
 411 *system, so everything that comes in via the fax actually goes directly into the computer and they then*  
 412 *allocate to the patient"*. (GP-11)

**Table 3.** Positive and negative feedback on facilitated relay intervention from general practitioners and patients

| General Practitioners |                                                                                                                                                                                                                         | Patients                                 |                                                                                                        |
|-----------------------|-------------------------------------------------------------------------------------------------------------------------------------------------------------------------------------------------------------------------|------------------------------------------|--------------------------------------------------------------------------------------------------------|
| <b>Positive</b>       |                                                                                                                                                                                                                         |                                          |                                                                                                        |
| <b>Composition</b>    | <p>"Overall I thought it was worded quite well and was very clear" (GP-08)</p> <p>"I think it's appropriate, it didn't take me very long to get through" (GP-16)</p>                                                    | <b>Provides structure to interaction</b> | "My doctor would be okay with that. It gives them a little checklist of things to talk about". (Pt-05) |
| <b>Tone</b>           | <p>"it's written in a way that doesn't make you feel stupid, I guess" (GP-11)</p> <p>"it's good because [it's] not telling you to do this [start statin therapy], but telling you to have a conversation]." (GP-17)</p> | <b>Enhances communication</b>            | "I think that's good 'cause these doctors, some guys don't communicate." (Pt-13)                       |

|                           |                                                                                                                                                                                                                                                                                                                                                                     |                                         |                                                                                                                                                                                                                                                                                                                                                                                                  |
|---------------------------|---------------------------------------------------------------------------------------------------------------------------------------------------------------------------------------------------------------------------------------------------------------------------------------------------------------------------------------------------------------------|-----------------------------------------|--------------------------------------------------------------------------------------------------------------------------------------------------------------------------------------------------------------------------------------------------------------------------------------------------------------------------------------------------------------------------------------------------|
| <b>Credibility</b>        | <p>“it gives family physicians more confidence to do those things and know the specialists are behind them in that recommendation” (GP-02)</p> <p>“there’s so much information for people to sift through... if you can get valid information that’s corroborated and consistent, that’s helpful” (GP-15)</p>                                                       | <b>Increases doctor accountability</b>  | <p>“I think it keeps them [doctors] honest as well. They should actually be proactive in terms of having that information already, but that’s not always the case. So I don’t have a problem with a patient having all their information at their disposal”. (Pt-14)</p>                                                                                                                         |
| <b>Direct</b>             | <p>“it’s a good idea... it tells you what to do, which is great. You don’t have to look up the guideline every time” (GP-04)</p> <p>“it’s just one of those extra little reminders that takes the brain power out of the work you have to do day-to-day” (GP-06)</p>                                                                                                | <b>Increases patient accountability</b> | <p>“If [patients] are encouraged to work with their doctor to monitor your numbers, you have a bit of control as well as the doctor... like working together”. (Pt-03)</p>                                                                                                                                                                                                                       |
| <b>Information</b>        | <p>“[side effects] are what people hear about in the news a lot, so it’s very helpful to have some numbers around it, and strategies to address that” (GP-09)</p> <p>“All the suggestions that you made are excellent. I’m reading through this and I’m like ‘oh yeah, I didn’t realize this’ and ‘this is something I can do for some of my patients’” (GP-12)</p> | <b>Provides peace of mind</b>           | <p>“It gives me a little peace of mind in that we’ve talked about all of the things that are important and that should be covered... that we haven’t left anything out”. (Pt-05)</p>                                                                                                                                                                                                             |
| <b>Negative</b>           |                                                                                                                                                                                                                                                                                                                                                                     |                                         |                                                                                                                                                                                                                                                                                                                                                                                                  |
| <b>Increased workload</b> | <p>“I would caution against anything that causes more documents or more paperwork... there’s already so much” (GP-16)</p>                                                                                                                                                                                                                                           | <b>Privacy concerns</b>                 | <p>“You know what, my doctor isn’t going to send it out to me, anyway. It’s going to go on to a receptionist, who might pass it on to somebody else in the office, so there’s no guarantee of privacy there” (Pt-05)</p> <p>“Privacy is always an issue. I mean it’s like, the less information that’s out there about you, the better off you are, period. I don’t care what it is” (Pt-07)</p> |



|                                 |                                                                                                                                                                                                                 |                                        |                                                                                                                                                                                                                                                                               |
|---------------------------------|-----------------------------------------------------------------------------------------------------------------------------------------------------------------------------------------------------------------|----------------------------------------|-------------------------------------------------------------------------------------------------------------------------------------------------------------------------------------------------------------------------------------------------------------------------------|
| <b>Disclosing new diagnoses</b> | “my concern is that they get this information from a letter... my preference would be that it came straight to me” (GP-01)                                                                                      | <b>Difficulty interpreting results</b> | “Some people might know all the numbers and everything else, I don’t. You give me a bunch of numbers, it means nothing to me. So unless the doctor explained it to me... I’d rather talk to my doctor” (Pt-07)                                                                |
| <b>Therapeutic relationship</b> | “If the patient gets a letter that’s like ‘you need to be on a statin’ and we already had a conversation that they didn’t need a statin. That could cause some issues in the therapeutic relationship.” (GP-04) | <b>Provoking Anxieties</b>             | “There are people who are coming down with every disease known to man, so for someone like that, that kind of information would just send them off the deep-end, right?” (Pt-05)                                                                                              |
| <b>Logistical concerns</b>      | “What if a person gets a check from a walk-in clinic? My concern is then is that walk-in clinic docs are just going to ignore this letter” (MD-05)                                                              | <b>Lack of engagement</b>              | “You mentioned mail outs and things like that... have they proven to be effective, though, ‘cause how many people read them? How many people understand them? I don’t think there would be a lot of point in it, ‘cause I don’t think people pay that much attention” (Pt-09) |
|                                 | “If it goes to the patient, sometimes you get lots of mail and they may just discard it” (MD-10)                                                                                                                | <b>Sense of intimidation</b>           | “Some will [say] ‘I can’t talk to my doctor like that’. There will be some people who might be intimidated to initiate that conversation” (Pt-03)                                                                                                                             |

## DISCUSSION

While statins have a more limited role in certain populations (low risk and those with limited life expectancy) (52, 53), they are important for the prevention of cardiovascular disease in patients who have previous vascular disease and in those with diabetes and kidney disease (4-6, 47). In this study, both GPs and patients acknowledged that there is the potential to improve the prescription and use of statin therapy among those at high risk for cardiovascular disease. In unprompted questions, GPs acknowledged that there was a need for improved physician education on this topic, and that tools to help identify and track patients would be helpful. Patients also suggested that if directly receiving laboratory test results and information on treatment options may result in better medical care, generally supporting our hypothesis that facilitating shared decision making was a key element of a novel intervention. When shown the proposed intervention, both groups were strongly supportive of the facilitated relay intervention. While there were clear benefits to the intervention, some potential downsides were raised by both GPs and patients. In general, all recipients would prefer letters to be succinct, yet contain high yield information and provide contact information where clarification could be sought.

Many interventions have been attempted to address the problem of statin underuse. A number of patient-centered approaches have been tried with varying success (22). While active forms of education, like cognitive education and behavioural counselling seem to work (54), more passive forms of education are often unsuccessful at changing behaviour, as in the recent ISLAND trial which found their intervention, comprised of a mail and phone education strategy to encourage patients to take

1  
2  
3 438 prescribed medication, had no impact on adherence (55). Others have found that multifaceted  
4 439 interventions focusing on enhancing care provision through team-based care may be effective at  
5 440 increasing statin adherence (56).

6 441  
7 442 However, when trying to target the problem of low statin prescribing, interventions directed only at  
8 443 patients are not likely to work. An alternate approach is to facilitate GPs ability to identify and prescribe  
9 444 statins, to those in whom they are appropriate (57), through audit and feedback or facilitated relay. An  
10 445 educational audit and feedback intervention regarding dyslipidemia treatment in Italian primary care  
11 446 practices was shown to increase adherence to statins by approximately 10% (58). Improved  
12 447 communication and shared decision making, which are explicit goals of facilitated relay interventions,  
13 448 can improve patient adherence (59). While these and other studies have reviewed the clinical efficacy of  
14 449 quality improvement strategies (21), few have used detailed qualitative methods as we have done. One  
15 450 large qualitative study interviewed audit and feedback experts to generate hypotheses about the  
16 451 various factors that may contribute to the efficacy of such interventions (60). Others have used  
17 452 qualitative methods to highlight the barriers physicians face in encouraging adherence (61), but ours is  
18 453 unique in using such methods to design and develop an intervention to address these challenges. Finally,  
19 454 we also appreciate that as much as there is underuse of statins, there is also overuse, for example, in  
20 455 people with short life expectancy. Perhaps interventions to increase initiation may also include a  
21 456 component that conveys statin benefits are measured in years rather than months.

22 457  
23 458 The fact that participants suggested elements of our facilitated relay intervention in the unprompted  
24 459 portion of the interviews lends credibility and face validity to the proposed intervention. However, it is  
25 460 notable that while GPs felt they would benefit from having internal systems to monitor patients'  
26 461 records, none independently suggested a strategy mediated by an independent third party (such as  
27 462 facilitated relay or audit and feedback), as we have proposed. Investigators who wish to implement  
28 463 facilitated relay interventions to enhance adherence to medical therapies can use the findings of this  
29 464 study to help develop interventions that are more likely to be acceptable to both GPs and patients. One  
30 465 of the main findings is to ensure that any information provided is brief and high yield, containing patient  
31 466 identifiers early to capture general practitioner's attention. Such interventions can be strengthened by  
32 467 incorporating education on controversial or little-known topics. Patients strongly preferred any  
33 468 correspondence to also contain direct suggestions or an action plan. Workflow and processing of these  
34 469 letters needs to be considered and interventions designed to be as minimally disruptive to clinical  
35 470 practice as possible – with most physicians preferring that it be embedded directly within the EMR; yet  
36 471 in healthcare settings (like ours) where there is marked heterogeneity in the use and type of EMRs, this  
37 472 may not be possible.

38 473  
39 474 There are limitations to this study. Firstly, as in most qualitative studies, the number of participants was  
40 475 relatively small. This concern over sample size is mitigated by the fact that physician interviews  
41 476 proceeded until the point of saturation. Patient data were not collected in this manner, and these  
42 477 themes may not be fully saturated and we appreciate this as a limitation. Furthermore, the patient  
43 478 sample we recruited may not be representative of the broader population, as many of them had  
44 479 previously stated an interest in quality improvement and research and therefore may be attuned to the  
45 480 importance of preventive therapies more than other members of the general public. Secondly, given the  
46 481 context-dependent nature of qualitative data, the applicability of these findings to other settings is not  
47 482 certain. Yet physicians in most settings face similar problems (i.e. time constraints, patient complexity  
48 483 and comorbidities and patient resistance to medical therapies) in numerous facets of medical care;  
49 484 therefore, it is conceivable that the findings of this study would apply to interactions between patients  
50 485 and GPs in other clinical settings. Due to time constraints of participants and researchers, member

1  
2  
3 486 checking was not undertaken in this study. Finally, it is important to note that feedback was sought  
4 487 specifically about the proposed intervention. However, given the details reported, we feel that these  
5 488 findings are likely to be helpful to others proposing similar quality improvement interventions. One of  
6 489 the major strengths of this study is the depth and richness of the qualitative data that were collected. By  
7 490 asking questions in an open-ended manner, we were able to record detailed accounts and opinions.  
8 491 Another strength of this work is the fact that we also sought patient input into the development of this  
9 492 intervention, rather than relying on physician feedback alone.  
10 493

11 494 Statin therapy has been demonstrated to effectively lower cholesterol and reduce the risk of  
12 495 cardiovascular events and death in individuals at high risk of cardiovascular disease. Despite this, they  
13 496 remain underused. There are patient, provider and system factors that contribute to statin underuse.  
14 497 Facilitated relay interventions hold promise as a potential method to address this important care gap.  
15 498 Our study sought perspectives of both healthcare providers and patients, which will be incorporated  
16 499 into intervention design to maximize acceptability. Insights gained from qualitative data will be used to  
17 500 improve the likelihood of success and achieve the desired clinical impact. The insights about these  
18 501 interventions are also likely to be of interest to many researchers and clinicians who are considering and  
19 502 designing provider- and/or patient-facing interventions to improve the uptake of preventive  
20 503 medications.  
21 504

#### 22 505 **Contributions**

23 506 DJTC, RCWL, KAM, TJA, HQ, AACL, GC, ML, CN, SB collaborated to develop the research question and  
24 507 methods. The study design was conceived by DJTC and SB. DJTC wrote the first draft of the study  
25 508 protocol. Data collection and analysis was completed by DJTC, RCWL and SB. KAM, TJA, HQ, AACL, GC,  
26 509 ML, and CN contributed to the interpretation and contextualization of study findings. The first draft of  
27 510 the manuscript was written by DJTC. RCWL, KAM, TJA, HQ, AACL, GC, ML, CN, and SB contributed  
28 511 substantively to further revisions of the manuscript and have consented to the publication of this  
29 512 version.  
30 513

#### 31 514 **Funding**

32 515 Funding for this project was provided by a research grant to Sonia Butalia from Diabetes Canada.  
33 516

#### 34 517 **Data Availability Statement**

35 518 No additional data available. Given that qualitative data are not deidentified and tell individuals'  
36 519 personal stories, data cannot be shared beyond the scope of this project, as per our research ethics  
37 520 board.  
38 521

#### 39 522 **Competing Interest Statement**

40 523 DC, RL, KAM, AL, TA, HQ, GC, SB – none. CN is a director of a private laboratory that does not currently  
41 524 offer testing in the jurisdiction under study.  
42 525

43 526  
44  
45  
46  
47  
48  
49  
50  
51  
52  
53  
54  
55  
56  
57  
58  
59  
60

## References

1. World Health Organization. The top 10 causes of death 2018 [Available from: <https://www.who.int/news-room/fact-sheets/detail/the-top-10-causes-of-death>].
2. Silverman MG, Ference BA, Im K, Wiviott SD, Giugliano RP, Grundy SM, et al. Association Between Lowering LDL-C and Cardiovascular Risk Reduction Among Different Therapeutic Interventions: A Systematic Review and Meta-analysis. *JAMA*. 2016;316(12):1289-97.
3. Byrne P, Cullinan J, Smith SM. Statins for primary prevention of cardiovascular disease. *BMJ*. 2019;367:l5674.
4. Colhoun HM, Betteridge DJ, Durrington PN, Hitman GA, Neil HA, Livingstone SJ, et al. Primary prevention of cardiovascular disease with atorvastatin in type 2 diabetes in the Collaborative Atorvastatin Diabetes Study (CARDS): multicentre randomised placebo-controlled trial. *Lancet*. 2004;364(9435):685-96.
5. Baigent C, Landray MJ, Reith C, Emberson J, Wheeler DC, Tomson C, et al. The effects of lowering LDL cholesterol with simvastatin plus ezetimibe in patients with chronic kidney disease (Study of Heart and Renal Protection): a randomised placebo-controlled trial. *Lancet*. 2011;377(9784):2181-92.
6. Collins R, Armitage J, Parish S, Sleight P, Peto R, Heart Protection Study Collaborative G. MRC/BHF Heart Protection Study of cholesterol-lowering with simvastatin in 5963 people with diabetes: a randomised placebo-controlled trial. *Lancet*. 2003;361(9374):2005-16.
7. Anderson TJ, Grégoire J, Pearson GJ, Barry AR, Couture P, Dawes M, et al. 2016 Canadian Cardiovascular Society Guidelines for the Management of Dyslipidemia for the Prevention of Cardiovascular Disease in the Adult. *Canadian Journal of Cardiology*. 2016;32(11):1263-82.
8. Grundy SM, Stone NJ. 2018 American Heart Association/American College of Cardiology/Multisociety Guideline on the Management of Blood Cholesterol-Secondary Prevention. *JAMA Cardiol*. 2019;4(6):589-91.
9. Butalia S, Lewin A, Simpson S, Dasgupta K, Khan N, Pilote L, et al. Sex-based disparities in cardioprotective medication use in adults with diabetes. *Diabetol Metab Syndr*. 2014;5(6):117.
10. Anderson TJ, Grégoire J, Hegele RA, Couture P, Mancini GBJ, McPherson R, et al. 2012 Update of the Canadian Cardiovascular Society Guidelines for the Diagnosis and Treatment of Dyslipidemia for the Prevention of Cardiovascular Disease in the Adult. *Canadian Journal of Cardiology*. 2013;29(2):151-67.
11. Johansen ME, Green LA, Sen A, Kircher S, Richardson CR. Cardiovascular Risk and Statin Use in the United States. *The Annals of Family Medicine*. 2014;12(3):215-23.
12. Gamble JM, Butalia S. Medical Practice Variations in Diabetes Mellitus. In: Johnson A, Stukel T, editors. *Medical Practice Variations*. Health Services Research: Springer US; 2015. p. 1-40.
13. Tu JV, Chu A, Maclagan L, Austin PC, Johnston S, Ko DT, et al. Regional variations in ambulatory care and incidence of cardiovascular events. *Canadian Medical Association Journal*. 2017;189(13):E494-E501.
14. Hennessy DA, Tanuseputro P, Tuna M, Bennett C, Perez R, Shields M, et al. Population health impact of statin treatment in Canada. *Health Rep*. 2016;27(1):20-8.
15. Yang Q, Zhong Y, Gillespie C, Merritt R, Bowman B, George MG, et al. Assessing potential population impact of statin treatment for primary prevention of atherosclerotic cardiovascular diseases in the USA: population-based modelling study. *BMJ Open*. 2017;7(1):e011684.
16. Butalia S, Lee-Krueger R, McBrien K, Leung A, Anderson T, Quan H, et al. Barriers and Facilitators to Using Statins: A Qualitative Study with Patients and Family Physicians *Canadian Journal of Cardiology Open*. 2020;Online ahead of print.

- 1  
2  
3 572 17. Schroff P, Gamboa CM, Durant RW, Oikeh A, Richman JS, Safford MM. Vulnerabilities to Health  
4 573 Disparities and Statin Use in the REGARDS (Reasons for Geographic and Racial Differences in Stroke)  
5 574 Study. *J Am Heart Assoc.* 2017;6(9).
- 6 575 18. Cohen JD, Brinton EA, Ito MK, Jacobson TA. Understanding Statin Use in America and Gaps in  
7 576 Patient Education (USAGE): an internet-based survey of 10,138 current and former statin users. *J Clin*  
8 577 *Lipidol.* 2012;6(3):208-15.
- 9 578 19. Jacobson TA, Khan A, Maki KC, Brinton EA, Cohen JD. Provider recommendations for patient-  
10 579 reported muscle symptoms on statin therapy: Insights from the Understanding Statin Use in America  
11 580 and Gaps in Patient Education survey. *J Clin Lipidol.* 2018;12(1):78-88.
- 12 581 20. Worrall G, Chaulk P, Freake D. The effects of clinical practice guidelines on patient outcomes in  
13 582 primary care: a systematic review. *CMAJ.* 1997;156(12):1705-12.
- 14 583 21. Tricco AC, Ivers NM, Grimshaw JM, Moher D, Turner L, Galipeau J, et al. Effectiveness of quality  
15 584 improvement strategies on the management of diabetes: a systematic review and meta-analysis. *Lancet.*  
16 585 2012;379(9833):2252-61.
- 17 586 22. Rash JA, Campbell DJ, Tonelli M, Campbell TS. A systematic review of interventions to improve  
18 587 adherence to statin medication: What do we know about what works? *Prev Med.* 2016;90:155-69.
- 19 588 23. Walsh J, McDonald KM, Shojania KG, Sundaram V, Nayak S, Davies S, et al. Closing the Quality  
20 589 Gap: A Critical Analysis of Quality Improvement Strategies (Vol 3: Hypertension Care). AHRQ Technical  
21 590 Reviews. Rockville (MD)2005.
- 22 591 24. Zhang Y, Moran AE. Trends in the Prevalence, Awareness, Treatment, and Control of  
23 592 Hypertension Among Young Adults in the United States, 1999 to 2014. *Hypertension.* 2017;70(4):736-42.
- 24 593 25. Jardine MJ, Kasiske B, Adu D, Alrukhaimi M, Ashuntantang GE, Basnet S, et al. Closing the gap  
25 594 between evidence and practice in chronic kidney disease. *Kidney Int Suppl (2011).* 2017;7(2):114-21.
- 26 595 26. Walsh JM, McDonald KM, Shojania KG, Sundaram V, Nayak S, Lewis R, et al. Quality  
27 596 improvement strategies for hypertension management: a systematic review. *Med Care.* 2006;44(7):646-  
28 597 57.
- 29 598 27. Campbell DJ, Sargious P, Lewanczuk R, McBrien K, Tonelli M, Hemmelgarn B, et al. Use of  
30 599 chronic disease management programs for diabetes: in Alberta's primary care networks. *Can Fam*  
31 600 *Physician.* 2013;59(2):e86-92.
- 32 601 28. Sandelowski M. Whatever happened to qualitative description? *Res Nurs Health.* 2000;23(4):7.
- 33 602 29. Pope C, van Royen P, Baker R. Qualitative methods in research on healthcare quality. *Qual Saf*  
34 603 *Health Care.* 2002;11(2):148-52.
- 35 604 30. Ayala GX, Elder JP. Qualitative methods to ensure acceptability of behavioral and social  
36 605 interventions to the target population. *J Public Health Dent.* 2011;71 Suppl 1:S69-79.
- 37 606 31. Tong A, Sainsbury P, Craig J. Consolidated criteria for reporting qualitative research (COREQ): a  
38 607 32-item checklist for interviews and focus groups. *Int J Qual Health Care.* 2007;19(6):349-57.
- 39 608 32. Michie S, van Stralen MM, West R. The behaviour change wheel: a new method for  
40 609 characterising and designing behaviour change interventions. *Implement Sci.* 2011;6:42.
- 41 610 33. Cane J, O'Connor D, Michie S. Validation of the theoretical domains framework for use in  
42 611 behaviour change and implementation research. *Implement Sci.* 2012;7:37.
- 43 612 34. Michie S, Johnston M, Francis J, Hardeman W, Eccles M. From Theory to Intervention: Mapping  
44 613 Theoretically Derived Behavioural Determinants to Behaviour Change Techniques. *Applied Psychology.*  
45 614 2008;57(4):660-80.
- 46 615 35. Barrett B, Ricco J, Wallace M, Kiefer D, Rakel D. Communicating statin evidence to support  
47 616 shared decision-making. *BMC Fam Pract.* 2016;17:41.
- 48 617 36. Weymiller AJ, Montori VM, Jones LA, Gafni A, Guyatt GH, Bryant SC, et al. Helping patients with  
49 618 type 2 diabetes mellitus make treatment decisions: statin choice randomized trial. *Arch Intern Med.*  
50 619 2007;167(10):1076-82.

- 1  
2  
3 620 37. Santana M, Zelinsky S, Ahmed S, Doktorchik C, James M, Wilton S, et al. Working Together with  
4 621 Patients and Clinician Researchers to Improve Cardiovascular Health. 2018 SPOR Summit; Ottawa, ON.  
5 622 38. Santana M, Zelinsky S, Ahmed S, Doktorchik C, James M, Wilton S, et al. Working Together: Co-  
6 623 designing Priorities for Patient-Oriented Cardiovascular Research by Patients, Clinicians, and  
7 624 Researchers. Canadian Association for Health Services and Policy Research (CAHSPR); Halifax, NS2019.  
8 625 39. Guest G, Namey E, Taylor J, Eley N, McKenna K. Comparing focus groups and individual  
9 626 interviews: findings from a randomized study. *Int J Soc Res Methodol*. 2017;20(6):693-708.  
10 627 40. Kedward J, Dakin L. A qualitative study of barriers to the use of statins and the implementation  
11 628 of coronary heart disease prevention in primary care. *Br J Gen Pract*. 2003;53(494):684-9.  
12 629 41. Maningat P, Gordon BR, Breslow JL. How do we improve patient compliance and adherence to  
13 630 long-term statin therapy? *Curr Atheroscler Rep*. 2013;15(1):291.  
14 631 42. Walker JL. The use of saturation in qualitative research. *Can J Cardiovasc Nurs*. 2012;22(2):37-  
15 632 46.  
16 633 43. Hsieh HF, Shannon SE. Three approaches to qualitative content analysis. *Qual Health Res*.  
17 634 2005;15(9):1277-88.  
18 635 44. Santana MJ, Zelinsky S, Ahmed S, Doktorchik C, James M, Wilton S, et al. Patients, clinicians and  
19 636 researchers working together to improve cardiovascular health: a qualitative study of barriers and  
20 637 priorities for patient-oriented research. *BMJ Open*. 2020;10(2):e031187.  
21 638 45. Drew P, Jones B, Norton D. Team effectiveness in primary care networks in Alberta. *Healthc Q*.  
22 639 2010;13(3):33-8.  
23 640 46. Manns BJ, Tonelli M, Zhang J, Campbell DJT, Sargious P, Ayyalasomayajula B, et al. Enrolment in  
24 641 primary care networks: impact on outcomes and processes of care for patients with diabetes. *Canadian*  
25 642 *Medical Association Journal*. 2012;184(2):E144-E52.  
26 643 47. Anderson TJ, Gregoire J, Pearson GJ, Barry AR, Couture P, Dawes M, et al. 2016 Canadian  
27 644 Cardiovascular Society Guidelines for the Management of Dyslipidemia for the Prevention of  
28 645 Cardiovascular Disease in the Adult. *Can J Cardiol*. 2016;32(11):1263-82.  
29 646 48. Toward Optimized Practice Cardiovascular Disease Risk Working Group. Prevention and  
30 647 management of cardiovascular disease risk in primary care clinical practice guideline Edmonton, AB:  
31 648 Toward Optimized Practice; 2015 [Available from:  
32 649 <https://top.albertadoctors.org/CPGs/Lists/CPGDocumentList/CVD-Risk-CPG.pdf>.  
33 650 49. Tibrewala A, Jivan A, Oetgen WJ, Stone NJ. A Comparative Analysis of Current Lipid Treatment  
34 651 Guidelines: Nothing Stands Still. *J Am Coll Cardiol*. 2018;71(7):794-9.  
35 652 50. Toward Optimized Practice (TOP) Cardiovascular Disease Risk Working Group. Prevention and  
36 653 management of cardiovascular disease risk in primary care clinical practice  
37 654 guideline 2015 [Available from:  
38 655 <http://www.topalbertadoctors.org/download/1655/Lipid%20Pathway%20CPG.pdf>? 20150916105016.  
39 656 51. Catapano AL, Graham I, De Backer G, Wiklund O, Chapman MJ, Drexel H, et al. 2016 ESC/EAS  
40 657 Guidelines for the Management of Dyslipidaemias. *Rev Esp Cardiol (Engl Ed)*. 2017;70(2):115.  
41 658 52. Kristensen M, Christensen PM, Hallas J. The effect of statins on average survival in randomised  
42 659 trials, an analysis of end point postponement. *BMJ Open*. 2014;5(007118).  
43 660 53. Abramson JD, Rosenberg HG, Jewell N, Wright JM. Should people at low risk of cardiovascular  
44 661 disease take a statin? *BMJ*. 2013;347:f6123.  
45 662 54. Jornten-Karlsson M, Pintat S, Molloy-Bland M, Berg S, Ahlqvist M. Patient-Centered  
46 663 Interventions to Improve Adherence to Statins: A Narrative Synthesis of Systematically Identified  
47 664 Studies. *Drugs*. 2016;76(15):1447-65.

- 1  
2  
3 665 55. Ivers NM, Schwalm JD, Bouck Z, McCready T, Taljaard M, Grace SL, et al. Interventions  
4 666 supporting long term adherence and decreasing cardiovascular events after myocardial infarction  
5 667 (ISLAND): pragmatic randomised controlled trial. *BMJ*. 2020;369:m1731.  
6 668 56. van Driel ML, Morledge MD, Ulep R, Shaffer JP, Davies P, Deichmann R. Interventions to improve  
7 669 adherence to lipid-lowering medication. *Cochrane Database Syst Rev*. 2016;12:CD004371.  
8 670 57. Kaya H, Beton O, Yilmaz M. How to increase level of patients' awareness regarding the  
9 671 importance of statins despite the influence of the media? *International Journal of Cardiology*.  
10 672 2016;207:164.  
11 673 58. Casula M, Tragni E, Piccinelli R, Zambon A, De Fendi L, Scotti L, et al. A simple informative  
12 674 intervention in primary care increases statin adherence. *Eur J Clin Pharmacol*. 2016;72(2):227-34.  
13 675 59. Wilson SR, Strub P, Buist AS, Knowles SB, Lavori PW, Lapidus J, et al. Shared treatment decision  
14 676 making improves adherence and outcomes in poorly controlled asthma. *Am J Respir Crit Care Med*.  
15 677 2010;181(6):566-77.  
16 678 60. Colquhoun HL, Carroll K, Eva KW, Grimshaw JM, Ivers N, Michie S, et al. Advancing the literature  
17 679 on designing audit and feedback interventions: identifying theory-informed hypotheses. *Implement Sci*.  
18 680 2017;12(1):117.  
19 681 61. Kvarnström K, Airaksinen M, Liira H. Barriers and facilitators to medication adherence: a  
20 682 qualitative study with general practitioners. *BMJ Open*. 2018;8(1):e015332.

21  
22  
23  
24 683  
25 684  
26  
27  
28  
29  
30  
31  
32  
33  
34  
35  
36  
37  
38  
39  
40  
41  
42  
43  
44  
45  
46  
47  
48  
49  
50  
51  
52  
53  
54  
55  
56  
57  
58  
59  
60

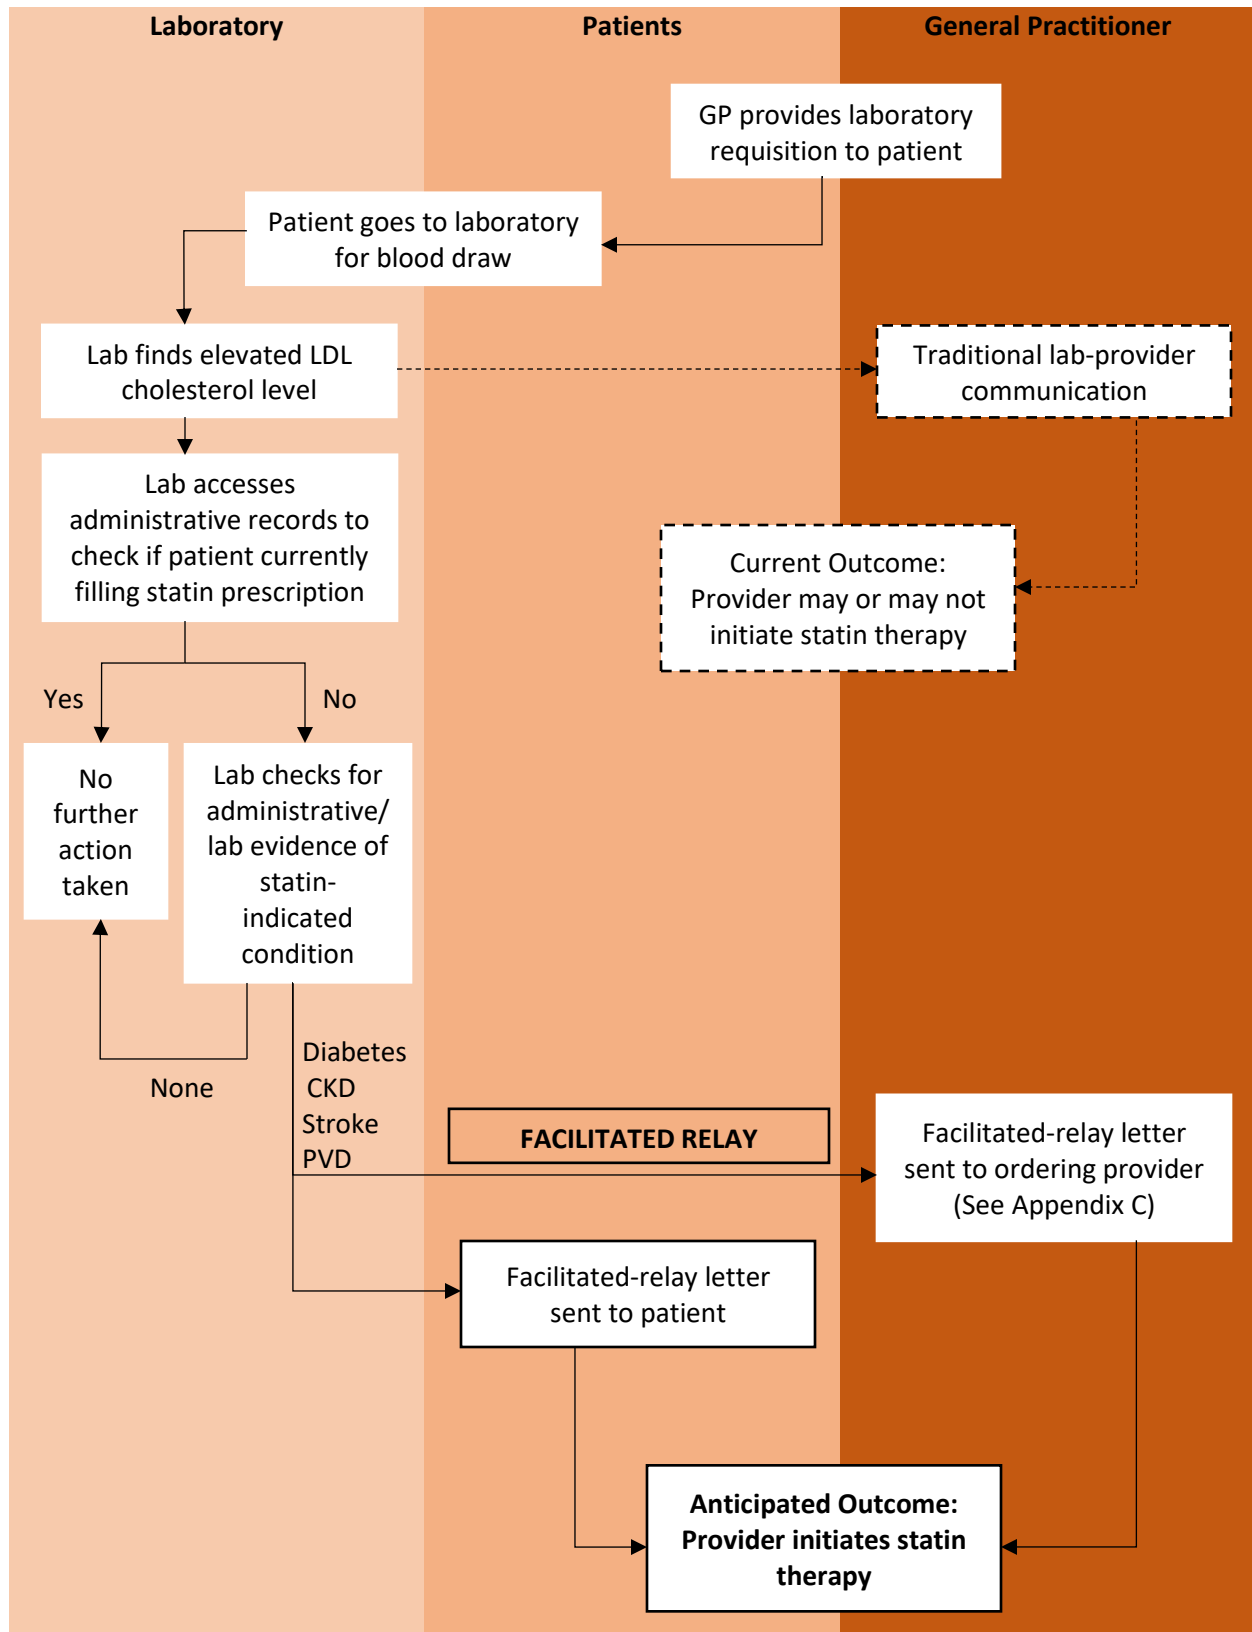

**Figure 1: Laboratory-Based Facilitated-Relay Intervention**  
 Dashed lines: traditional interface between lab and ordering provider



## **Appendix A: Interview Guide for health care professional**

Thank you for agreeing to participate in our interview today. We wish to discuss your experience in managing dyslipidemia (or high cholesterol) in order to better understand how we might help family physicians treat dyslipidemia (or high cholesterol). We have a proposed intervention and would like your assistance in how to enrich it.

### **1. Experience managing dyslipidemia**

Please describe any challenges or difficulties that you experience in identifying and managing patients with dyslipidemia?

- Do you use any resources to guide you in the management of these patients?
  - Canadian Cardiovascular Society Guidelines
  - Diabetes Canada Guidelines
  - TOP guidelines

In addition to measuring a patient's lipids, what are some other parameters that you consider when assessing a patient for dyslipidemia, and how to optimally manage this condition?

### **2. Dyslipidemia-related practices**

In your practice, do you find it helpful to quantify a patient's LDL-cholesterol or get a lipid panel?

If yes,

- Are there certain populations in whom you find this test most helpful?
- What is your chosen method/diagnostic test to do so?
  - Fasting or random lipid profile
    - Total cholesterol
    - HDL-cholesterol
    - LDL-cholesterol
  - ApoB
- How does this information change your clinical practice?
- How often do you repeat cholesterol testing for patients with conditions that puts them at high risk for cardiovascular disease (i.e. previous clinical cardiovascular disease, diabetes, chronic kidney disease)?

If no,

- Why is it not particularly helpful?
  - Don't know which test to do
  - Don't know how to order it
  - Don't know in whom it is indicated

- Don't know what to do with the results

In thinking about your practice, what proportion of your patients with conditions that put them at high risk for cardiovascular disease (i.e. previous myocardial infarction, stroke, diabetes, and/or chronic kidney disease) have had their lipid profile assessed in the past 12 months?

What are some of the reasons this does not happen (in your practice and in others')?

- Didn't think it was indicated/for whom it is indicated
- Too many things to attend to
- Not perceived to be an important issue amongst all other disease/conditions that FPs manage
- Patient factors (doesn't go for test)

### 3. Intervention

If we wanted to increase the use of statins among people at high risk for cardiovascular disease (i.e. previous clinical cardiovascular disease, diabetes, chronic kidney disease), what might be done? What tools, resources, prompts may help facilitate increased treatment of dyslipidemia?

In your opinion, what type of educational intervention is most effective in disseminating clinical practice guidelines to family physicians? (i.e. conferences, local lectures, treatment recommendations on lab results).

We are considering the use of a facilitated relay strategy, where patient's information from Calgary Laboratory Services is used to identify those who have indications for statin therapy. Those who are not currently filling statin prescriptions at the pharmacy would receive a letter from the lab indicating that they may benefit from statins. They will be encouraged to bring this letter in to discuss this with you.

How would family physicians respond to receiving a letter from the lab prompting them to consider starting their patient on statin treatment?

- What would be the characteristics of such a letter that would make it more likely to succeed?
  - Short/Pictorial/Colorful

Would it be more helpful to have this information specific about one named patient, or rather have an audit of your entire practice that would indicate what proportion of eligible patients with statin-indicated conditions are currently being treated with statins? (i.e. Audit and Feedback)

1  
2  
3 How should such an intervention either on a specific patient or about your entire practice  
4 be received?  
5

- 6 • Mail/Fax/EMR/combo

7  
8  
9 How would such an intervention be processed in your office?

- 10 • Who would open the envelope?
- 11 • What would they do with it? (give it to you, put it in the patient's chart)
- 12 • How likely would you be to see this information?

13  
14  
15  
16 Who should this letter be coming from in order to have it received in the most positive  
17 way possible?  
18

- 19 • A non-clinical academic researcher (Dr. XXXX)
- 20 • Head of the Calgary Laboratory Services (Dr. Christopher Naugler)
- 21 • A lipid specialist (Dr. Sonia Butalia, Alex Leung)
- 22 • An academic family doctor (Dr. Kerry McBrien)
- 23 • A respected community family doctor
- 24 • The lead of Dyslipidemia Guidelines (Dr. Todd Anderson)
- 25 • Dr. Cello Tonelli, Associate Vice-President (Research) at the University of  
26 Calgary
- 27 • Dr. Richard Lewanczuk, Senior Medical Director for Primary Care, Chronic  
28 Disease Management, Community and Rural for Alberta Health Services
- 29 • Someone else

30  
31  
32  
33  
34  
35 Would it be helpful to receive a reminder or follow-up letter?

- 36 • How much later should this be sent, so as to be useful and not annoying?

37  
38  
39 If the intervention provided you with patient-oriented material about this subject, and  
40 asked you to share it with your patients, how would you feel about doing so?

- 41 • What content should be included in this patient-oriented material to enhance statin  
42 use?
- 43 • What format should this material be in? Electronic, hard-copy? How should it be  
44 delivered? Mail, email?
- 45 • Would you share it in a clinical setting?
- 46 • Would you be willing to mail it to patients directly?

47  
48  
49  
50  
51 Do you have any additional comments or suggestions for developing an intervention to  
52 increase the use statins in people at high risk for cardiovascular disease (i.e. previous  
53 clinical cardiovascular disease, diabetes, chronic kidney disease) in primary care?  
54  
55  
56  
57  
58  
59  
60

1  
2  
3 Thank you for participating in today's interview. Using the information you provided, we  
4 will work on developing an intervention to improve the treatment of dyslipidemia in  
5 patients who are at high risk for cardiovascular disease (i.e. previous clinical  
6 cardiovascular disease, diabetes, chronic kidney disease)?  
7  
8

### 9 **Appendix B: Focus Group Guide for patients**

10 Thank you for agreeing to participate in our focus group today. There are many risk  
11 factors for heart attacks and stroke. Today we want to focus on one risk factor being high  
12 cholesterol. High cholesterol is a major risk factor for heart attacks, strokes and  
13 circulatory problems. There are no symptoms of high cholesterol and it is diagnosed by a  
14 lab test that your doctor would order. Importantly, we work for the University of Calgary  
15 and have no relationship with any medication companies.  
16  
17

18 We wish to discuss your experience in managing *cholesterol* with medications in order to  
19 better understand how we might help family physicians (*doctors*) treat high cholesterol.  
20  
21

#### 22 **1. Experience with high cholesterol**

23 Think about the last time your doctor has sent you for a cholesterol test. Did your doctor  
24 talk to you about the results? Treatment? What kind of treatment was discussed (diet,  
25 exercise, a medication)?  
26  
27

28 Put yourself in the position of being told that you need to take a medication for your  
29 cholesterol. What factors would make you more likely to take it? What factors would  
30 make you not want to take it? Reasons, side effects, costs  
31  
32

- 33 • Would you use any resources to help you decide?
  - 34 ○ Doctor
  - 35 ○ Dietician
  - 36 ○ Internet
  - 37 ○ Family, friends
  - 38
  - 39

40 What would you think if your doctor told you that your cholesterol wasn't all that high,  
41 but because of your other health conditions she wanted to start you on a cholesterol  
42 lowering medication to reduce your risk of heart attack and stroke?  
43  
44

45 Do you think it would be helpful to get the actual result of your cholesterol level sent  
46 directly from the lab to you?  
47  
48

49  
50 Currently, cancer screening programs send letters to patients about their results and next  
51 steps. What are your thoughts for something similar for high cholesterol?  
52  
53  
54  
55  
56  
57  
58  
59  
60

1  
2  
3 What about information about recommended treatments and potential side effects?  
4 Would you find this to be invasive of your privacy (i.e. info from the lab about treatment  
5 and not your doctor)?  
6  
7

8  
9  
10 How would you feel about taking a letter with these recommendations to your doctor to  
11 discuss about a medication for high cholesterol?  
12

13  
14 How do you feel your doctor would respond to you bringing this information?  
15  
16

17  
18 What things on the letter would make it helpful?  
19

20 -length, colour, graphics,  
21  
22

23  
24  
25 Who should this letter be coming from in order to have it received in the most positive  
26 way possible?  
27

- 28 • A non-clinical academic researcher (Dr. XXXX)
- 29 • Head of the Calgary Laboratory Services (Dr. Christopher Naugler)
- 30 • A lipid specialist (Dr. Sonia Butalia, Alex Leung)
- 31 • An academic family doctor (Dr. Kerry McBrien)
- 32 • A respected community family doctor
- 33 • The lead of Dyslipidemia Guidelines (Dr. Todd Anderson)
- 34 • Dr. Richard Lewanczuk, Senior Medical Director for Primary Care, Chronic  
35 Disease Management, Community and Rural for Alberta Health Services
- 36 • Someone else  
37  
38  
39

40  
41 Would it be helpful to receive a reminder or follow-up letter?  
42

- 43 • How much later should this be sent, so as to be useful and not annoying?  
44

45 Do you have any additional comments or suggestions for developing an way to increase  
46 the use the treatment of people with high cholesterol?  
47  
48  
49  
50  
51  
52  
53  
54  
55  
56  
57  
58  
59  
60

## Appendix C: Facilitated Relay Letter

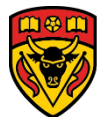

UNIVERSITY OF  
CALGARY

Date: XXXX-XX-XX

Dear Dr. [Physician Last Name],

RE: [Patient Name]

As you may recall, your Primary Care Network is involved in a study with the University of Calgary. This is an investigator-initiated study with public funding from the [*Canadian Institutes of Health Research*].

Dyslipidemia is a major risk factor for myocardial infarction and stroke<sup>1-2</sup>. As you know, in patients like [name], statins are indicated for their dyslipidemia because they are proven to reduce cardiovascular outcomes and mortality<sup>3-4</sup>. Because of numerous randomized controlled trials, guidelines recommend statin use in individuals with history of previous cardiovascular disease, diabetes, or chronic renal failure<sup>5</sup>.

We are writing to you to consider initiating a statin in your patient. We know the importance of the therapeutic relationship that you have with your patients and know that we do not know your patient like you do. The purpose of this letter is to assist in you in your discussion with [name], about using a statin medication.

[Name] may not be taking a statin because of underestimation of their personal risk of cardiovascular disease, fear of side-effects, previous side-effects, or cost. If cost is a concern, compassionate programs are available for several statin medications. Please kindly call our study telephone number to assist in facilitating this.

The most common side effect from statins is muscle aches, and the frequency of statin-induced rhabdomyolysis is very rare (i.e. < 1 in 10,000 patients per year on statins)<sup>6</sup>. Studies suggest that there are several proven methods for managing people who have experienced muscle aches. For those unable to tolerate daily high intensity statins, some statin is still better than none, and the following strategies can be considered:

1. *Reducing the dose of statin.* i.e. Atorvastatin 10-20mg or Rosuvastatin 2.5-5mg<sup>7</sup>.
2. *Trying a low potency statin medication.* Lower potency statins seem to be less strongly associated with muscle aches. Fluvastatin and Pravastatin were much less likely than Simvastatin and Atorvastatin to cause myalgia<sup>8</sup>. For your reference, maximum doses of these low potency statins, and their equivalencies are:

1  
2 Pravastatin 80mg = Atorvastatin 20mg = Rosuvastatin 10mg  
3 Fluvastatin XL 80mg = Atorvastatin 10mg = Rosuvastatin 5mg  
4

- 5  
6 3. *Reducing dose or lengthening administration interval.* Studies have demonstrated that  
7 greater than 70% of patients affected by myalgias were able to tolerate every other day  
8 administration with no recurrence of muscle symptoms<sup>9</sup>.  
9

10 There is a small chance that your patient may have been misclassified with a statin indicated  
11 condition. We sincerely apologize for this and would be most appreciative if you can call or fax us to  
12 let us know.  
13

14  
15 We welcome any questions or comments so please kindly contact us at 403-955-8327 (or fax 403-955-  
16 8249), for more information.  
17

18  
19 Sincerely,  
20 Sonia Butalia MD, FRCPC, MSc and the study team  
21  
22  
23  
24  
25  
26  
27  
28  
29  
30  
31

## 32 References

- 33  
34  
35 1. Yusuf S, Hawken S, Ôunpuu S, et al. *The Lancet*. 2004;364(9438):937-952.  
36 2. O'Donnell MJ, Xavier D, Liu L, et al. *The Lancet*. 2010;376(9735):112-123.  
37 3. Cholesterol Treatment Trialists Collaboration. *The Lancet*. 2010;376(9753):1670-1681.  
38 4. Cholesterol Treatment Trialists Collaborators. *The Lancet*. 2012;380(9841):581-590.  
39 5. Anderson TJ, Grégoire J, Pearson GJ, et al. 2016 Canadian Cardiovascular Society Guidelines  
40 for the Management of Dyslipidemia for the Prevention of Cardiovascular Disease in the Adult.  
41 *Canadian Journal of Cardiology*. 2016;32(11):1263-1282.  
42 6. Graham DJ, Staffa JA, Shatin D, et al. *JAMA*. 2004;292(21):2585-2590.  
43 7. Arca M, Pigna G. *Diabetes, Metabolic Syndrome and Obesity: Targets and Therapy*. 2011;4:155-  
44 166.  
45 8. Bruckert E, Hayem G, Dejager S, Yau C, Bégaud B. *Cardiovascular Drugs and Therapy*.  
46 December 01 2005;19(6):403-414.  
47 9. Bellosta S, Paoletti R, Corsini A. *Circulation*. June 15, 2004 2004;109(23 suppl 1):III-50-III-57.  
48  
49  
50  
51  
52  
53  
54  
55  
56  
57  
58  
59  
60

**Strategies for Enhancing Cholesterol Lowering Medication Use  
Among Patients at High Cardiovascular Disease Risk: Patient and  
General Practitioners' Perspectives on a Facilitated Relay  
Intervention**

Consolidated criteria for reporting qualitative studies (COREQ): 32-item checklist

| No | Item                                                       | Guide questions/<br>description                             | Response           |
|----|------------------------------------------------------------|-------------------------------------------------------------|--------------------|
|    | <b>Domain 1:<br/>Research<br/>team and<br/>reflexivity</b> |                                                             |                    |
|    | Personal<br>Characteristics                                |                                                             |                    |
| 1. | Interviewer/facilitator                                    | Which author/s conducted the interview or focus group?      | Line 137           |
| 2. | Credentials                                                | What were the researcher's credentials? <i>E.g. PhD, MD</i> | Author information |
| 3. | Occupation                                                 | What was their occupation at the time of the study?         | Line 137           |
| 4. | Gender                                                     | Was the researcher male or female?                          | Line 137           |
| 5. | Experience and training                                    | What experience or training did the researcher have?        | Line 137           |



| No                                | Item                                     | Guide questions/<br>description                                                                                                                                 | Response                          |
|-----------------------------------|------------------------------------------|-----------------------------------------------------------------------------------------------------------------------------------------------------------------|-----------------------------------|
|                                   | Relationship with participants           |                                                                                                                                                                 |                                   |
| 6.                                | Relationship established                 | Was a relationship established prior to study commencement?                                                                                                     | Line 138-139                      |
| 7.                                | Participant knowledge of the interviewer | What did the participants know about the researcher? <i>e.g. personal goals, reasons for doing the research</i>                                                 | Not discussed                     |
| 8.                                | Interviewer characteristics              | What characteristics were reported about the interviewer/facilitator? <i>e.g. Bias, assumptions, reasons and interests in the research topic</i>                | Not discussed                     |
| <b>Domain 2:<br/>study design</b> |                                          |                                                                                                                                                                 |                                   |
|                                   | Theoretical framework                    |                                                                                                                                                                 |                                   |
| 9.                                | Methodological orientation and Theory    | What methodological orientation was stated to underpin the study? <i>e.g. grounded theory, discourse analysis, ethnography, phenomenology, content analysis</i> | Qualitative Description – Line 98 |

| No  | Item                         | Guide questions/<br>description                                                           | Response                                                          |
|-----|------------------------------|-------------------------------------------------------------------------------------------|-------------------------------------------------------------------|
|     | Participant selection        |                                                                                           |                                                                   |
| 10. | Sampling                     | How were participants selected? <i>e.g. purposive, convenience, consecutive, snowball</i> | GP – Snowball (line 106-107)<br>Patients – Convenience (line 116) |
| 11. | Method of approach           | How were participants approached? <i>e.g. face-to-face, telephone, mail, email</i>        | Line 106-120                                                      |
| 12. | Sample size                  | How many participants were in the study?                                                  | Line 173<br>Line 186                                              |
| 13. | Non-participation            | How many people refused to participate or dropped out? Reasons?                           | Line 176-177                                                      |
|     | Setting                      |                                                                                           |                                                                   |
| 14. | Setting of data collection   | Where was the data collected? <i>e.g. home, clinic, workplace</i>                         | Line 137<br>Line 142                                              |
| 15. | Presence of non-participants | Was anyone else present besides the participants and researchers?                         | Line 143                                                          |
| 16. | Description of sample        | What are the important characteristics of the sample? <i>e.g. demographic data, date</i>  | Line 174-195                                                      |

| No                                         | Item                   | Guide questions/<br>description                                               | Response                       |
|--------------------------------------------|------------------------|-------------------------------------------------------------------------------|--------------------------------|
|                                            | Data collection        |                                                                               |                                |
| 17.                                        | Interview guide        | Were questions, prompts, guides provided by the authors? Was it pilot tested? | Appendix A& B                  |
| 18.                                        | Repeat interviews      | Were repeat interviews carried out? If yes, how many?                         | No                             |
| 19.                                        | Audio/visual recording | Did the research use audio or visual recording to collect the data?           | Line 146                       |
| 20.                                        | Field notes            | Were field notes made during and/or after the interview or focus group?       | Line 143-144                   |
| 21.                                        | Duration               | What was the duration of the interviews or focus group?                       | Line 142-143                   |
| 22.                                        | Data saturation        | Was data saturation discussed?                                                | Line 140 + limitations section |
| 23.                                        | Transcripts returned   | Were transcripts returned to participants for comment and/or correction?      | No                             |
| <b>Domain 3:<br/>analysis and findings</b> |                        |                                                                               |                                |

| No            | Item                           | Guide questions/<br>description                                                                                                          | Response                 |
|---------------|--------------------------------|------------------------------------------------------------------------------------------------------------------------------------------|--------------------------|
| Data analysis |                                |                                                                                                                                          |                          |
| 24.           | Number of data coders          | How many data coders coded the data?                                                                                                     | Line 156-160             |
| 25.           | Description of the coding tree | Did authors provide a description of the coding tree?                                                                                    | Line 157                 |
| 26.           | Derivation of themes           | Were themes identified in advance or derived from the data?                                                                              | Line 157-158 (inductive) |
| 27.           | Software                       | What software, if applicable, was used to manage the data?                                                                               | Line 164-165             |
| 28.           | Participant checking           | Did participants provide feedback on the findings?                                                                                       | Line 414-415             |
| Reporting     |                                |                                                                                                                                          |                          |
| 29.           | Quotations presented           | Were participant quotations presented to illustrate the themes / findings? Was each quotation identified? e.g. <i>participant number</i> | In-text and Table 3      |
| 30.           | Data and findings consistent   | Was there consistency between the data presented and the findings?                                                                       | Yes                      |

| No  | Item                    | Guide questions/<br>description                                        | Response        |
|-----|-------------------------|------------------------------------------------------------------------|-----------------|
| 31. | Clarity of major themes | Were major themes clearly presented in the findings?                   | Results section |
| 32. | Clarity of minor themes | Is there a description of diverse cases or discussion of minor themes? | Table 2 & 3     |

# BMJ Open

## Strategies for Enhancing the Initiation of Cholesterol Lowering Medication Among Patients at High Cardiovascular Disease Risk: A Qualitative Descriptive Exploration of Patient and General Practitioners' Perspectives on a Facilitated Relay Intervention in Alberta, Canada

|                                 |                                                                                                                                                                                                                                                                                                                                                                                                                                                                                                                                                                                                                                                                                                                                                                                                                          |
|---------------------------------|--------------------------------------------------------------------------------------------------------------------------------------------------------------------------------------------------------------------------------------------------------------------------------------------------------------------------------------------------------------------------------------------------------------------------------------------------------------------------------------------------------------------------------------------------------------------------------------------------------------------------------------------------------------------------------------------------------------------------------------------------------------------------------------------------------------------------|
| Journal:                        | <i>BMJ Open</i>                                                                                                                                                                                                                                                                                                                                                                                                                                                                                                                                                                                                                                                                                                                                                                                                          |
| Manuscript ID                   | bmjopen-2020-038469.R3                                                                                                                                                                                                                                                                                                                                                                                                                                                                                                                                                                                                                                                                                                                                                                                                   |
| Article Type:                   | Original research                                                                                                                                                                                                                                                                                                                                                                                                                                                                                                                                                                                                                                                                                                                                                                                                        |
| Date Submitted by the Author:   | 17-Oct-2020                                                                                                                                                                                                                                                                                                                                                                                                                                                                                                                                                                                                                                                                                                                                                                                                              |
| Complete List of Authors:       | Campbell, David; University of Calgary Cumming School of Medicine, Department of Medicine<br>Lee, Rachele; University of Ottawa<br>McBrien, Kerry; University of Calgary, Family Medicine<br>Anderson, Todd; University of Calgary Cumming School of Medicine, Department of Cardiac Sciences<br>Quan, Hude; University of Calgary, Community Health Sciences<br>Leung, Alexander; University of Calgary Cumming School of Medicine, Department of Medicine<br>Chen, Guanmin; University of Calgary Cumming School of Medicine, Community Health Sciences<br>Lu, Mingshan ; University of Calgary, Economics<br>Naugler, Christopher; University of Calgary, Pathology and Laboratory Medicine; Calgary Laboratory Services,<br>Butalia, Sonia; University of Calgary Cumming School of Medicine, Department of Medicine |
| <b>Primary Subject Heading</b>: | Cardiovascular medicine                                                                                                                                                                                                                                                                                                                                                                                                                                                                                                                                                                                                                                                                                                                                                                                                  |
| Secondary Subject Heading:      | Diabetes and endocrinology, General practice / Family practice, Health services research, Qualitative research, Renal medicine                                                                                                                                                                                                                                                                                                                                                                                                                                                                                                                                                                                                                                                                                           |
| Keywords:                       | QUALITATIVE RESEARCH, GENERAL MEDICINE (see Internal Medicine), Quality in health care < HEALTH SERVICES ADMINISTRATION & MANAGEMENT, Cardiology < INTERNAL MEDICINE, PREVENTIVE MEDICINE                                                                                                                                                                                                                                                                                                                                                                                                                                                                                                                                                                                                                                |
|                                 |                                                                                                                                                                                                                                                                                                                                                                                                                                                                                                                                                                                                                                                                                                                                                                                                                          |

SCHOLARONE™  
Manuscripts



I, the Submitting Author has the right to grant and does grant on behalf of all authors of the Work (as defined in the below author licence), an exclusive licence and/or a non-exclusive licence for contributions from authors who are: i) UK Crown employees; ii) where BMJ has agreed a CC-BY licence shall apply, and/or iii) in accordance with the terms applicable for US Federal Government officers or employees acting as part of their official duties; on a worldwide, perpetual, irrevocable, royalty-free basis to BMJ Publishing Group Ltd ("BMJ") its licensees and where the relevant Journal is co-owned by BMJ to the co-owners of the Journal, to publish the Work in this journal and any other BMJ products and to exploit all rights, as set out in our [licence](#).

The Submitting Author accepts and understands that any supply made under these terms is made by BMJ to the Submitting Author unless you are acting as an employee on behalf of your employer or a postgraduate student of an affiliated institution which is paying any applicable article publishing charge ("APC") for Open Access articles. Where the Submitting Author wishes to make the Work available on an Open Access basis (and intends to pay the relevant APC), the terms of reuse of such Open Access shall be governed by a Creative Commons licence – details of these licences and which [Creative Commons](#) licence will apply to this Work are set out in our licence referred to above.

Other than as permitted in any relevant BMJ Author's Self Archiving Policies, I confirm this Work has not been accepted for publication elsewhere, is not being considered for publication elsewhere and does not duplicate material already published. I confirm all authors consent to publication of this Work and authorise the granting of this licence.

1  
2  
3 **Strategies for Enhancing the Initiation of Cholesterol Lowering Medication Among Patients at High**  
4 **Cardiovascular Disease Risk: A Qualitative Descriptive Exploration of Patient and General**  
5 **Practitioners' Perspectives on a Facilitated Relay Intervention in Alberta, Canada**  
6

7 David J.T. Campbell, MD PhD FRCPC<sup>1,2,3</sup>

8 Rachelle C.W. Lee, MSc<sup>4</sup>

9 Kerry A. McBrien, MD MPH CCFP<sup>2,5</sup>

10 Todd J. Anderson, MD PhD FRCPC<sup>3</sup>

11 Hude Quan, MD PhD<sup>2</sup>

12 Alexander A.C. Leung, MD MPH FRCPC<sup>1,2,3</sup>

13 Guanmin Chen, MD PhD<sup>2</sup>

14 Mingshan Lu, PhD<sup>2,6</sup>

15 Christopher Naugler, MD FRCPC<sup>2,7</sup>

16 Sonia Butalia, MD MSc FRCPC<sup>1,2</sup>

17  
18  
19  
20 1 – Department of Medicine, Cumming School of Medicine, University of Calgary, Calgary, AB, Canada

21 2 – Department of Community Health Sciences, Cumming School of Medicine, University of Calgary,  
22 Calgary, AB, Canada

23 3 – Department of Cardiac Sciences, Cumming School of Medicine, University of Calgary, Calgary, AB,  
24 Canada

25 4 – Department of Innovation in Medical Education, Faculty of Medicine, University of Ottawa, Ottawa,  
26 ON, Canada

27 5 – Department of Family Medicine, Cumming School of Medicine, University of Calgary, Calgary, AB,  
28 Canada

29 6 – Department of Economics, Faculty of Arts, University of Calgary, Calgary, AB, Canada

30 7 – Department of Pathology & Laboratory Medicine, Cumming School of Medicine, University of  
31 Calgary, Calgary, AB, Canada  
32  
33

34 Correspondence:

35 Dr. David J.T. Campbell

36 TRW 3E33, 3280 Hospital Dr NW

37 Calgary, AB, Canada T2N 4Z6

38 [dcampbel@ucalgary.ca](mailto:dcampbel@ucalgary.ca)

39 403-210-9511  
40  
41

42 Word count: Main text (4861 words), abstract (283 words), 3 tables, 1 figure, 3 appendices  
43  
44  
45  
46  
47  
48  
49  
50  
51  
52  
53  
54  
55  
56  
57  
58  
59  
60



**ABSTRACT**

**Objective:** The objective of our study was to explore the perspectives of patients and general practitioners (GPs) regarding interventions to increase initiation of cholesterol lowering medication (or statins), including a proposed laboratory-based facilitated relay intervention.

**Design:** Qualitative descriptive study using interviews and focus groups for data collection, and thematic analysis for data analysis.

**Setting:** Primary care providers and patients in Calgary, Alberta, Canada.

**Participants:** 17 General Practitioners with primarily community-based, non-academic practices with at least 1 year of practice experience participated in semi-structured interviews. 14 patients at high risk of cardiovascular disease participated in focus groups.

**Main outcome measures:** Exploration of strategies that might be used to enhance the prescription of, and adherence to statin therapy for patients with statin-indicated conditions.

**Results:** GPs proposed a variety of interventions to improve statin prescription, including electronic record audit solutions, GP directed education and patient-oriented campaigns. Patients expressed that they may benefit from being provided access to their laboratory test results, as well as targeted education. Both parties provided positive feedback on the proposed laboratory-based facilitated relay intervention, while pointing out areas for improvement. Notably, GPs were concerned that the patient-directed component of the intervention might jeopardize therapeutic relationships, and patients were concerned about accidental disclosure of personal health information. Important considerations for the design of facilitated relay messaging should include brevity, simplicity and the provision of contact information for inquiries.

**Conclusions:** GPs and patients described several suggestions for increasing statin initiation and welcomed the proposal of a laboratory-based facilitated relay strategy. These findings support further testing of this intervention which may enhance GPs' ability to successfully engage patients in cardiovascular risk reduction through statin therapy.

**Keywords:** focus groups, qualitative research, interviews, statins, facilitated relay

## Strengths & Limitations of this Study

- This is a qualitative study, with relatively few participants – therefore we cannot say definitively if the views represented here represent those of all patients and prescribers.
- We sampled physician participants to the point of saturation, which means that we are confident the views represented here span the breadth of those held by physicians.
- The patient sample we recruited may not be representative of the broader population, as many of them had previously stated an interest in quality improvement and research – and this group was not sampled to saturation.
- Given the context-dependent nature of qualitative data, the applicability of these findings to other settings is not certain.
- By collecting qualitative data through open-ended questions, we were able to record detailed accounts and opinions.

## INTRODUCTION

Vascular disease, including coronary artery disease, peripheral artery disease, and cerebrovascular disease, remains among the leading causes of mortality worldwide (1). A class of medications, HMG-CoA reductase inhibitors, commonly known as statins, have proven to be effective for lowering the risk of vascular events (2). Individuals who have previously had vascular disease (i.e. secondary prevention) derive a greater absolute risk reduction from statins than those who have never had vascular disease (i.e. primary prevention) (3). There are some individuals who have never had vascular disease, such as those with diabetes or chronic kidney disease, who have also been shown in randomized controlled trials to benefit from therapy (4-6). Despite over 30 years of clinical use, efficacy, safety and cost-effectiveness data (7, 8), only 23% to 55% of individuals who would benefit take this medication and fewer than half of individuals are treated to target cholesterol levels (7, 9-11). There is substantial unwanted variability in dyslipidemia management, and health system intervention is required to promote equitable treatment (12, 13). The lack of statin treatment for patients with indicated conditions results in significant excess morbidity and mortality. In Canada, specifically, if all patients with indications for statins were treated, this would result in nearly 40,000 averted cardiovascular events annually (14). In the United States, 13% of cardiovascular deaths could be prevented with perfect statin adherence among patients at high cardiovascular risk (15).

Physicians and patients face numerous barriers when it comes to prescribing and adhering to statin therapy, from the providers perspective this includes lack of knowledge, conflicting clinical guidelines, lack of systems to identify patients who should be taking statins (16). On the other hand, patients often experience or fear side effects or are simply averse to taking additional medications (16). Furthermore, patients that face social disadvantages such as low income, lack of health insurance, and minority race are more likely to not use statins (17). A large US-based survey found that side effects were common and that many former statin users were unsatisfied with the explanation provided by their prescriber about the importance of the medication (18). Providers need resources to help them provide this counselling to patients and to arm them with strategies to mitigate common statin side effects, like muscle aches (19).

There are clearly many challenges that lead to the observed clinical treatment gap for patients who have indications for statin treatment. However, some studies have shown that such treatment gaps, in related conditions like hypertension, can be closed using quality improvement strategies (20-22).

1  
2  
3 83 Integrated quality improvement strategies that target both patients and healthcare providers are more  
4 84 likely to achieve quality indicators than strategies which only target one aspect in isolation (21). One  
5 85 such strategy is facilitated relay. Facilitated relay is a quality improvement strategy whereby information  
6 86 about individual patients is sent directly to healthcare providers through a means other than the usual  
7 87 clinical encounter (23). Despite the establishment and promotion of facilitated relay and other quality  
8 88 improvement strategies, there remain significant treatment gaps in hypertension (24) and other chronic  
9 89 conditions (25). Furthermore, while facilitated relay has been shown to be effective in improving a  
10 90 number of cardiovascular risk factors (21, 26), it remains among the least commonly used quality  
11 91 improvement strategies (27) and has not been explored in the management of dyslipidemia.  
12 92

13 93 For an intervention to have the potential to yield maximum impact, it is important to qualitatively seek  
14 94 the input of key stakeholders prior to the application of any intervention (28). This allows for the  
15 95 development of a higher quality intervention, rather than one that relies on physician feedback alone  
16 96 (29). As such, the objective of our study was to explore the perspectives of both patients and general  
17 97 practitioners' (GPs) regarding interventions to increase cholesterol lowering medication (or statin)  
18 98 prescription, including specific feedback on a proposed laboratory-based facilitated relay intervention.  
19 99

## 100 **METHODS:**

### 101 **Study Design**

102  
103  
104 We conducted a qualitative descriptive study (28) to explore patients' and GPs' perspectives on  
105 interventions to increase initiation of statins for cardiovascular risk reduction and treatment of high  
106 cholesterol in those at high cardiovascular risk. In addition to generic thoughts on potential hypothetical  
107 interventions, we specifically sought directed feedback and perceptions on the acceptability of the  
108 proposed facilitated relay intervention from both patients and GPs (30). We used the consolidated  
109 criteria for reporting qualitative research (COREQ) as the reporting framework for this study (31).  
110

### 111 **Proposed Intervention**

112  
113 We drew from behaviour change theory to develop a facilitated relay intervention to increase statin  
114 prescriptions (32-34) (Figure 1). Our proposed intervention partners with our province's single unified  
115 laboratory system to identify individuals who have elevated cholesterol levels, statin-indicated  
116 conditions, and who are not currently filling prescriptions for statins. Our lab system has access to  
117 province-wide administrative databases, including labs, pharmacy dispensations, and hospitalization  
118 data. For every elevated LDL-cholesterol level, the lab would have an algorithm that would check the  
119 patients' records for evidence of statin-indicated conditions (administrative markers of myocardial  
120 infarction, stroke, diabetes, or chronic kidney disease), and would then identify if the patient has  
121 recently filled a statin prescription. This is possible because of province-wide, linkable databases. For  
122 patients who are not filling statins, but who should be, their GP (who had ordered the cholesterol level)  
123 and the patient, will then each receive a letter outlining the indication for treatment and the potential to  
124 benefit from statin therapy. The patient letter will encourage them to speak to their GP, and the GP  
125 letter will encourage them to make an appointment to discuss directly with the patient - both with the  
126 objective to initiate or renew statin prescriptions. We felt that it was important to include patients in the  
127 facilitated relay to empower them in discussions with their GP and to enable shared decision-making  
128 (35), which has been demonstrated to improve adherence with statins (36).  
129

## Participant Recruitment

*General Practitioners:* We recruited general practitioners to participate in individual interviews, using a snowball sampling approach. First, we asked key stakeholders in areas of primary care, endocrinology, nephrology and cardiology affiliated with the university medical centre, to recommend community-based (non-academic) GPs to participate in the study. Individuals were then contacted by telephone and email with a formal invitation to participate. GPs who met the following criteria were enrolled: (1) currently practicing in community general practice settings; and, (2) at least one year of experience working as a GP in independent practice. We sampled participants purposively based on several key demographic characteristics in order to achieve representation across a range of ages, genders and practice types.

*Patients:* We recruited patients who would qualify as recipients of the proposed intervention. Specifically, we were interested in recruiting those at high risk of cardiovascular disease, who self-reported a prior history of high cholesterol, preferably with co-existing vascular disease (myocardial infarction, stroke or peripheral vascular disease), diabetes, or chronic kidney disease. Using a convenience sampling approach, we invited patients who were part of an established advisory panel and previously agreed to be contacted about research opportunities for study participation (37, 38). In addition, patients were recruited using poster advertisements placed throughout the academic health sciences centre and in various clinical care areas where care is provided to patients with diabetes, heart disease and kidney disease.

## Data Collection

Data was collected from September 2018 to November 2018 using both qualitative semi-structured interviews (with GPs) and focus groups (with patients). We chose focus groups for patients as rich personal disclosures are more likely to occur in this setting than in individual interviews (39). However, we purposely used individually scheduled interviews to offset potential aversion to focus groups by community-based GPs due to their competing clinical demands. Furthermore, we wanted to recruit from both urban and rural locales which is more challenging to do in a focus group.

*Question Guides:* Both focus groups and interviews were guided by question guides (Appendix A & B) which were developed based on a review of the literature (40, 41) and discussion with the research team. These were designed so that they initially asked study participants what they thought would be effective strategies or interventions to improve statin uptake (i.e. prescribing, patient use and adherence). After they had given their unprompted views, participants were then given a brief explanation of facilitated relay, the specifics of the proposed intervention (Figure 1), and they were shown a copy of the proposed intervention letter for GPs (Appendix C). After briefing participants on the principles and practices of facilitated relay and showing them our preliminary documents for the intervention, we asked them to provide feedback on this proposed intervention.

*Provider Interviews:* All interviews were conducted in-person (in clinician offices) or via telephone, by a female trained research assistant (RCWL) with oversight by experienced study team members. Physician interviews were continued until the point of theoretical saturation when no new information emerged from the interviews (42). Because the research objective was relatively focused, interviews were brief and lasted approximately 30 to 45 minutes.

177 *Patient Focus Groups:* None of the study team were acquainted with or involved in the clinical care of  
 178 the patients who participated. We convened two focus groups in our academic medical centre which  
 179 each lasted approximately 90 minutes. No one but researchers (including 1 facilitator and 2 field-note  
 180 takers) and participants were present. Focus group facilitators tried to ensure that there were no  
 181 dominant members and provide all participants with equal opportunity to voice their opinions.  
 182

183 Interviews and focus group proceedings were digitally audio-recorded and transcribed verbatim by a  
 184 professional transcriptionist. Field notes were recorded to inform data analysis. All data were  
 185 anonymized and stored securely. Signed informed consent was received from each study participant.  
 186 Gift cards were provided to all participants. Ethics approval was granted from the University's Health  
 187 Research Ethics Board.  
 188

### 189 **Data Analysis**

191 Analysis was completed using conventional qualitative content analysis (43), a method of interpreting  
 192 interview data with the goal of describing the phenomenon of interest. Transcripts for the initial three  
 193 interviews were reviewed by three team members (DJTC, RCWL and SB), with the objective of  
 194 inductively establishing a preliminary coding template that was used for subsequent data analysis. All  
 195 transcripts were then analyzed by two reviewers (DJTC and RCWL). Codes were generated from the  
 196 interview data and systematically applied to identify themes and patterns. The process was iterative,  
 197 reflexive, and interactive as continual data collection and analysis shaped each other. For example, code  
 198 titles or definitions identified based on earlier interviews were modified according to the data collected  
 199 during subsequent interviews. The team met together to review the coding to elicit discussion about the  
 200 coding strategy and attempted to achieve consensus to resolve coding discrepancies. NVivo 12  
 201 (Doncaster, Australia) qualitative data analysis software was used to facilitate the coding process.  
 202

### 203 **Patient and public involvement**

205 Patient partners and family members from the Libin Cardiovascular Institute's established patient and  
 206 family member advisory group (44) voiced that *prevention* was one of their top research priorities for  
 207 cardiovascular health. This work is related to prevention of cardiovascular disease. Patients were  
 208 included in focus groups.  
 209

## 210 **RESULTS**

212 In total, we eventually reached out to 27 GPs to invite them to participate, 4 declined to participate, 4  
 213 didn't respond to the invitation, 19 were scheduled for interviews, with 2 cancelling. We reached  
 214 saturation after having completed 17 individual GP interviews (Table 1a). The majority were women  
 215 (88%) with 65% having graduated from medical school within the last ten years. All GPs spent more  
 216 than 50% of their time in clinical practice, most were in urban centers within Primary Care Networks  
 217 (PCNs). PCNs are networks of GPs that share interdisciplinary resources to enhance the delivery of  
 218 primary care within geographical regions (45); they are associated with improved chronic disease care  
 219 and outcomes(46).  
 220

221 **Table 1a.** Descriptive statistics for General Practitioners (n = 17).

| Physician characteristics | Total (%) |
|---------------------------|-----------|
| Age (years)               |           |
| < 40                      | 13 (76)   |

|                                                                                                                               |                           |
|-------------------------------------------------------------------------------------------------------------------------------|---------------------------|
| 40 - 60                                                                                                                       | 4 (24)                    |
| Gender                                                                                                                        |                           |
| Man                                                                                                                           | 2 (12)                    |
| Woman                                                                                                                         | 15 (88)                   |
| Years of primary care practice                                                                                                |                           |
| < 10                                                                                                                          | 14 (83)                   |
| 10 – 20                                                                                                                       | 3 (18)                    |
| Years since medical school graduation                                                                                         |                           |
| < 10                                                                                                                          | 11 (65)                   |
| ≥10                                                                                                                           | 6 (35)                    |
| Primary Care Network membership                                                                                               |                           |
| Yes                                                                                                                           | 15 (88)                   |
| No                                                                                                                            | 2 (12)                    |
| Location of primary care practice                                                                                             |                           |
| Urban                                                                                                                         | 13 (76)                   |
| Rural                                                                                                                         | 4 (24)                    |
| Focused practice interest                                                                                                     |                           |
| Yes*                                                                                                                          | 9 (53)                    |
| No                                                                                                                            | 8 (47)                    |
| Clinical practice last 12 months                                                                                              |                           |
| Estimated number of patients at high CVD risk                                                                                 |                           |
| < 20                                                                                                                          | 1 (6)                     |
| 20 to 99                                                                                                                      | 7 (41)                    |
| ≥100                                                                                                                          | 9 (53)                    |
| Use of endocrinology consultation services                                                                                    |                           |
| Yes                                                                                                                           | 5 (29)                    |
| No                                                                                                                            | 12 (71)                   |
| Use of cardiology consultation services                                                                                       |                           |
| Yes                                                                                                                           | 10 (59)                   |
| No                                                                                                                            | 7 (41)                    |
| Use of nephrology consultation services                                                                                       |                           |
| Yes                                                                                                                           | 3 (18)                    |
| No                                                                                                                            | 14 (82)                   |
| Proportion of patients in their practice who would be considered high risk on the basis of cardiovascular risk factors (n=14) | Mean: 32%<br>Range 10-75% |
| Proportion of high-risk patients in their practice who have a current LDL-level on file (n=9)                                 | Mean: 82%<br>Range 70-90% |

\* Focused practice, or special interest types: care of the elderly (n = 2), emergency medicine (n = 1), urgent care (n = 1), refugee medicine (n = 1), obstetrics (n = 2), indigenous health (n = 2), lactation (n = 1).

Our patient focus groups had 8 and 6 participants, respectively (Table 1b). There was a range of ages represented among patients, with a similar number of men and women. Nearly all had a general practitioner and were also followed by medical specialist(s). The conditions represented in our patient group were diabetes, history of myocardial infarction and elevated cholesterol level; none reported a history of stroke, chronic kidney disease, or peripheral arterial disease.

**Table 1b.** Descriptive statistics for patient participants based on self-report (n = 14).

| Patient characteristics                              | Total (%) |
|------------------------------------------------------|-----------|
| Age (years)                                          |           |
| < 40                                                 | 2 (15)    |
| 40 - 60                                              | 5 (39)    |
| > 60                                                 | 6 (46)    |
| Gender                                               |           |
| Men                                                  | 6 (46)    |
| Women                                                | 7 (54)    |
| Chronic condition qualifying as "high CVD risk"      |           |
| High cholesterol only                                | 3 (23)    |
| Diabetes only                                        | 6 (46)    |
| Myocardial infarct (MI) only                         | 1 (8)     |
| Diabetes & MI                                        | 3 (23)    |
| Has a primary care provider                          |           |
| Yes                                                  | 12 (92)   |
| No                                                   | 1 (8)     |
| Followed by a medical specialist                     |           |
| Yes                                                  | 10 (77)   |
| No                                                   | 3 (23)    |
| Self-reported awareness of high cholesterol levels   |           |
| Yes                                                  | 11 (85)   |
| No                                                   | 2 (15)    |
| Current use of statin medication                     |           |
| Yes                                                  | 6 (46)    |
| If not, had spoken with physicians about statins     | 3 (23)    |
| If not, had not spoken with physicians about statins | 4 (31)    |

\*Note one participant did not complete a demographic questionnaire

234

235

### 236 General suggestions for potential interventions

237

238 Several themes arose regarding interventions to improve statin initiation during the unprompted  
 239 portion of the interviews (Table 2). GPs described that statin prescribing may be improved by: (1)  
 240 enhancing aspects of physician education to promote appropriate statin prescribing; and, (2)  
 241 implementation of support tools to help physicians in decision-making and identification of patients for  
 242 whom statins are indicated. In addition, patients suggested that having access to their own laboratory  
 243 results may enable them to be more effective self-advocates.

244

**Table 2.** General suggestions by general practitioners and patients to increase initiation of statins

|           |                                       |                                                                                                                                                                                                                                                                                                                                                                                                                                                                                                                                                                                                                                                                                                                                                                                                                                                                                                               |
|-----------|---------------------------------------|---------------------------------------------------------------------------------------------------------------------------------------------------------------------------------------------------------------------------------------------------------------------------------------------------------------------------------------------------------------------------------------------------------------------------------------------------------------------------------------------------------------------------------------------------------------------------------------------------------------------------------------------------------------------------------------------------------------------------------------------------------------------------------------------------------------------------------------------------------------------------------------------------------------|
| Providers | Treatment of specific Sub-populations | <p>Patients with chronic kidney disease:<br/> <i>"I struggle with the GFRs [glomerular filtration rate] – knowing when it would be safe, when it wouldn't be safe. I do get confused as to the dosing based on GFR."</i> (GP-05)</p> <p>Patients who previously experienced side effects with statin(s):<br/> <i>"I have one strategy but if somebody is still like 'no, it's completely not tolerable for me' then I don't know what the next step is after that."</i> (GP-13)</p> <p>Elderly patients:<br/> <i>"...getting some better understanding about the elderly. Are there any contraindications to starting on statin therapy? Is there one statin that may be more beneficial than another?"</i> (GP-10)</p> <p>Patients with hypertriglyceridemia:<br/> <i>"I always find it hard to know what to do with triglycerides... more education around how to manage those [patients]."</i> (GP-15)</p> |
|           | Treatment to Targets *                | <p><i>"Most people in my office are confused about what we are doing in terms of treating to the target of 2 mmol/L, because the cardiologist is still sending consults about that, but then we have these family medicine evidence-based groups saying that targets don't matter"</i>. (GP-02)</p> <p><i>"I know the TOP [Towards Optimized Practice] guidelines don't necessarily correlate with CCS [Canadian Cardiovascular Society] guidelines, so there are several schools of thought"</i>. (GP-09)</p> <p><i>"There's no real way to unify the guidelines, but to have an education session on why they're different and how to approach it so maybe you'll break down patient populations that fit better with one guideline versus another"</i>. (GP-08)</p>                                                                                                                                        |
|           | Preferred modality of Education       | <p><i>"we have a lot of drug reps [representatives] coming to town, so it would be great to have more [education] that was not pharma, absolutely"</i>. (GP-04)</p>                                                                                                                                                                                                                                                                                                                                                                                                                                                                                                                                                                                                                                                                                                                                           |
|           | EMR-based tools                       | <p><i>"One thing that would be helpful for me is if there was some automatic flag that came when I saw a patient that would alert to the fact that their treatment is not optimized for their conditions"</i>. (GP-06)</p>                                                                                                                                                                                                                                                                                                                                                                                                                                                                                                                                                                                                                                                                                    |
| Patients  | Laboratory Results                    | <p><i>"I would like to get a copy, in addition to the doctor. I can do with it what I want"</i> (Pt-09)</p> <p><i>"It gets you questioning things so that you can come back to your doctor and say 'I saw these numbers, what does that mean? What do I need to do?'"</i> (Pt-02)</p>                                                                                                                                                                                                                                                                                                                                                                                                                                                                                                                                                                                                                         |
|           | Enhanced education                    | <p><i>"What if somebody was going regularly to a lab, and a clinician sort of goes: 'How are you doing on this?'"</i>. (Pt-08)</p>                                                                                                                                                                                                                                                                                                                                                                                                                                                                                                                                                                                                                                                                                                                                                                            |



245 EMR: electronic medical record

246 \* Specialist guidelines, the 2016 Canadian Cardiovascular Society guideline (47) advocates that patients  
247 at high risk (based on risk calculators) or those with 'statin-indicated conditions' (defined as diabetes,  
248 chronic kidney disease, or preexisting vascular disease be treated with statin therapy to achieve a target  
249 LDL-c level of < 2.0 mmol/L. GP Guidelines, the 2015 TOP Alberta Guideline (48) encourages GPs to treat  
250 high risk patients with moderate-to-high intensity statins and should not repeat lipid levels, or attempt  
251 to treat to a fixed target.

252

253

### 254 1) General practitioner *education*:

255

256 Nearly all GPs highlighted that there are general areas of knowledge that could be bolstered in order to  
257 enhance statin prescription. One of the main content areas in which they sought enhanced education  
258 related to the treatment of specific patient sub-populations, in particular those with chronic kidney  
259 disease, patients who have had prior statin intolerance/side-effects, elderly patients, and those with  
260 other concurrent lipid disorders (i.e. hypertriglyceridemia).

261

262 Whether providers should be treating patients to a specific cholesterol level was a major source of  
263 confusion. They frequently referenced receiving conflicting advice, including a contradiction in clinical  
264 practice guidelines(49), some of which advocate for a 'fire and forget' approach(8, 50), while  
265 Canadian(7) and European(51) specialist guidelines recommend a 'treat-to-target' approach(7).

266

267 Regarding the modality of education sessions, most preferred in-person education sessions delivered at  
268 their clinics and delivered by someone who did not have clear conflicts of interest with pharmaceutical  
269 companies. Many GPs also suggested the use of handouts, tools or algorithms to simplify their decision-  
270 making process.

271

### 272 2) General practitioner *tools*

273

274 In addition to education, several GPs suggested that the use of automated tools would facilitate their  
275 prescribing of statins. Most felt that they would benefit from optimizing the use of their electronic  
276 medical records (EMR) to 'flag' individuals who were at high cardiovascular risk or had elevated  
277 cholesterol levels. Other GPs spoke of wishing for a 'running list' of eligible patients, while some  
278 mentioned using an employee or contractor designated as a panel manager to perform these tasks.

279

### 280 3) *Patient results and information*

281

282 Many patients independently indicated that they would like to have access to their lipid test results,  
283 without needing to rely on this being conveyed to them by their general practitioner. Some patients also  
284 suggested that providing them with their own results might reduce the frequency of unnecessary follow-  
285 up visits; and as a result, alleviate related financial burden on the healthcare system. Doing so was also  
286 thought to help foster patient engagement with their GP.

287

288 Patients also felt that having greater access to information about cholesterol and treatment might  
289 facilitate more patients being on statin therapy. Suggestions were made to deliver this through  
290 enhanced patient-facing materials (i.e. brochures), as well as pharmacists or lab technicians who were  
291 able to discuss results and treatment options. Further information about patient education, shared

292 decision-making, and clinical decision support tools are described in our other report from this work  
293 (16).

294

### 295 **Feedback on the proposed facilitated relay intervention**

296

297 Emerging themes regarding our proposed intervention were organized into four major categories: (1)  
298 general feedback and impression; (2) suggested changes; (3) intervention details; and, (4) workflow  
299 processing considerations.

300

#### 301 *1) General feedback and impression*

302

303 General practitioners responded to the proposed intervention with strongly positive feedback (Table 3),  
304 which included stating that they found the information to be helpful and direct. They generally felt that  
305 the letter was written in a clear fashion and with a respectful tone. Several mentioned that the  
306 information provided them with reassurance and credibility in making recommendations to their  
307 patients.

308

309 GPs also voiced some questions and potential concerns after hearing about our proposed intervention.  
310 These concerns included whether the introduction of a facilitated relay intervention might increase their  
311 workload, lead to possible disclosure to patients of new diagnoses of conditions that qualified them as  
312 high risk (i.e. diabetes), and pose a threat to their therapeutic relationships with patients. In addition,  
313 logistical issues around how the letter will be best delivered to ordering providers and patients were  
314 raised as concerns.

315

316 Patients generally felt that bringing their facilitated relay letter to a scheduled appointment would be  
317 positive in their relationship by providing structure to the follow-up encounter, holding GPs to account,  
318 and enhancing patient-provider communication. Even though most were generally positive, some  
319 patients expressed concern about the facilitated relay intervention, including the possibility for privacy  
320 breaches and increasing patient anxieties.

321

#### 322 *2) Suggested information to remove or add*

323

324 We asked GPs specifically what they would like to see changed in the preliminary materials shown.  
325 Almost unanimously, they suggested that the letter would be more appreciated if it the two-page  
326 document were shortened to fit on one page. Several participants suggested removing the references,  
327 mention of clinical studies, and guideline citations to make it more reader-friendly. There was also a  
328 preference voiced for revising the introductory paragraphs to have direct relevance to individual  
329 patient(s):

330

331 *"I'm going to read it for sure, but then when you start to read it, people might put it down and say*  
332 *'oh this is a study intervention', [but] if you have the first thing at the very top: 'you know this person*  
333 *has been identified as being at risk' – then it's about the patient rather than being about the*  
334 *studies". (GP-16)*

335

336 A few GPs voiced opinions that specific additions could be made to improve the letter's utility. These  
337 suggestions included adding: information about health behavior change (*"the whole picture, as opposed*  
338 *to just medication"* (GP-04)); adding contact information for a specialist; and details about how/why a  
339 particular individual was flagged as eligible for the facilitated relay intervention: *"It would be helpful if I*

340 *got a name, condition and then the statin-indicated condition, and where the condition was pulled*  
341 *from”. (GP-01)*

342  
343 Patient feedback was notable for also suggesting that the intervention provide contact information, in  
344 case they have further questions about interpreting their results: *“back that up with a helpline for*  
345 *somebody that doesn’t know what the [results] mean” (Pt-10)*. Similar to physicians, patients expressed  
346 a strong preference for brevity: *“If I have to go through 14 pages of information to figure out what that*  
347 *means, I’m sorry, I don’t have time for that” (Pt-07)*.

348  
349 However, numerous patients also stressed the importance of not only providing results or diagnoses,  
350 but also giving some basic education and an action plan to follow.

### 351 352 *3) Intervention details*

353  
354 In addition to general feedback, we also explicitly asked GPs whether they would prefer to receive  
355 information about their patient in the form of facilitated relay (individual letter for each patient  
356 identified) or ‘audit and feedback’ (summary report including a group of their patient panel). A summary  
357 list or report (audit and feedback) was preferred by roughly 2/3 of the general practitioners interviewed.  
358 Regarding receiving letters for each patient, participants stated:

359  
360 *“this is going to get tiresome very quickly” (GP-05)*

361  
362 *“Am I going to get this letter 20 times? I’m probably just going to read it once” (GP-03)*

363  
364 *“[a list would] decrease paper burden, decrease the chance of it getting misplaced”. (GP-13)*

365  
366 While the ‘audit and feedback’ approach was more popular, some GPs were clearly in favor of facilitated  
367 relay: *“I can’t even think of the amount of work it would take to do it patient-specific. I’d love it. Sure go*  
368 *for it, if you have the means to do it, then why not?” (GP-10)*

369  
370 We also asked pointedly about how providers would feel about receiving a follow-up reminder from the  
371 study team, if patients had not filled the prescription as recommended in the initial letter. The response  
372 was split with roughly half of the general practitioners stating that a reminder would not be necessary.

373  
374 Those who felt a reminder would be acceptable generally agreed that a 6 month window should be  
375 sufficient to ascertain whether or not the patient would have started on therapy: *“There are people that*  
376 *have a three-month wait list time, you may have to pick an interval more like six-months to appeal to the*  
377 *masses...”. (GP-13)*

378  
379 Most patients felt that they would benefit from receiving a follow-up reminder. After considerable  
380 discussion amongst the groups, consensus was achieved that follow-up should not happen prior to four  
381 months, and possibly even as long as six months after the initial contact. One participant stated: *“close*  
382 *enough that I vaguely remember that I meant to do something with that, but not a few weeks later, [so]*  
383 *it’s not irritating”. (GP-17)*

384  
385 We also asked patients if they had a preference for who had signed the letter. Most felt that having  
386 letters come from a local specialist in cardiology or endocrinology would be preferable to having them  
387 signed by another GP.

388  
389 *4) Workflow processing considerations (General practitioners only)*  
390

391 To each GP we asked specific details about how our intervention letter would be received in their offices  
392 and what would happen upon receipt. The majority stated that such a letter would be opened and  
393 processed by their front-desk staff. One participant clarified that the information on the envelope would  
394 determine who opened it: *"if it's addressed to me then it will come to me, if it has a patient name for*  
395 *me, then it goes through our document people [who file it]"*. (GP-09)  
396

397 Once the letter has been opened, different offices employed a variety of different processes. In many  
398 practices, it would be given directly to the GP; while in others it would be scanned directly into a  
399 patient's file in an electronic medical record, yet in others, the hardcopy would be filed in a patient's  
400 chart.  
401

402 In terms of the preferred delivery modality, most GPs felt that electronic delivery directly via the EMR  
403 platform would be the preferred method of receiving the intervention. However, a number still felt that  
404 conventional delivery via paper mail or fax would be preferable. Even those who expressed a preference  
405 for conventional delivery, many elaborated that such letters would often be scanned into a patient's  
406 electronic file: *"if it was to come by mail or fax, then they have to scan it onto the computer"* (GP-11). A  
407 few GPs described systems which can do this process automatically: *"our office works with a new web*  
408 *system, so everything that comes in via the fax actually goes directly into the computer and they then*  
409 *allocate to the patient"*. (GP-11)  
410

**Table 3.** Positive and negative feedback on facilitated relay intervention from general practitioners and patients

| General Practitioners |                                                                                                                                                                                                                         | Patients                                 |                                                                                                                                                                                   |
|-----------------------|-------------------------------------------------------------------------------------------------------------------------------------------------------------------------------------------------------------------------|------------------------------------------|-----------------------------------------------------------------------------------------------------------------------------------------------------------------------------------|
| Positive              |                                                                                                                                                                                                                         |                                          |                                                                                                                                                                                   |
| <b>Composition</b>    | <p>"Overall I thought it was worded quite well and was very clear" (GP-08)</p> <p>"I think it's appropriate, it didn't take me very long to get through" (GP-16)</p>                                                    | <b>Provides structure to interaction</b> | "My doctor would be okay with that. It gives them a little checklist of things to talk about". (Pt-05)                                                                            |
| <b>Tone</b>           | <p>"it's written in a way that doesn't make you feel stupid, I guess" (GP-11)</p> <p>"it's good because [it's] not telling you to do this [start statin therapy], but telling you to have a conversation]." (GP-17)</p> | <b>Enhances communication</b>            | "I think that's good 'cause these doctors, some guys don't communicate." (Pt-13)                                                                                                  |
| <b>Credibility</b>    | "it gives family physicians more confidence to do those things and know the specialists are behind them in that recommendation" (GP-02)                                                                                 | <b>Increases doctor accountability</b>   | "I think it keeps them [doctors] honest as well. They should actually be proactive in terms of having that information already, but that's not always the case. So I don't have a |

|                                 |                                                                                                                                                                                                                                                                                                                                                                     |                                         |                                                                                                                                                                                                                                                                                                                                                                                                  |
|---------------------------------|---------------------------------------------------------------------------------------------------------------------------------------------------------------------------------------------------------------------------------------------------------------------------------------------------------------------------------------------------------------------|-----------------------------------------|--------------------------------------------------------------------------------------------------------------------------------------------------------------------------------------------------------------------------------------------------------------------------------------------------------------------------------------------------------------------------------------------------|
|                                 | <p>“there’s so much information for people to sift through... if you can get valid information that’s corroborated and consistent, that’s helpful” (GP-15)</p>                                                                                                                                                                                                      |                                         | <p>problem with a patient having all their information at their disposal”. (Pt-14)</p>                                                                                                                                                                                                                                                                                                           |
| <b>Direct</b>                   | <p>“it’s a good idea... it tells you what to do, which is great. You don’t have to look up the guideline every time” (GP-04)</p> <p>“it’s just one of those extra little reminders that takes the brain power out of the work you have to do day-to-day” (GP-06)</p>                                                                                                | <b>Increases patient accountability</b> | <p>“If [patients] are encouraged to work with their doctor to monitor your numbers, you have a bit of control as well as the doctor... like working together”. (Pt-03)</p>                                                                                                                                                                                                                       |
| <b>Information</b>              | <p>“[side effects] are what people hear about in the news a lot, so it’s very helpful to have some numbers around it, and strategies to address that” (GP-09)</p> <p>“All the suggestions that you made are excellent. I’m reading through this and I’m like ‘oh yeah, I didn’t realize this’ and ‘this is something I can do for some of my patients’” (GP-12)</p> | <b>Provides peace of mind</b>           | <p>“It gives me a little peace of mind in that we’ve talked about all of the things that are important and that should be covered... that we haven’t left anything out”. (Pt-05)</p>                                                                                                                                                                                                             |
| <b>Negative</b>                 |                                                                                                                                                                                                                                                                                                                                                                     |                                         |                                                                                                                                                                                                                                                                                                                                                                                                  |
| <b>Increased workload</b>       | <p>“I would caution against anything that causes more documents or more paperwork... there’s already so much” (GP-16)</p>                                                                                                                                                                                                                                           | <b>Privacy concerns</b>                 | <p>“You know what, my doctor isn’t going to send it out to me, anyway. It’s going to go on to a receptionist, who might pass it on to somebody else in the office, so there’s no guarantee of privacy there” (Pt-05)</p> <p>“Privacy is always an issue. I mean it’s like, the less information that’s out there about you, the better off you are, period. I don’t care what it is” (Pt-07)</p> |
| <b>Disclosing new diagnoses</b> | <p>“my concern is that they get this information from a letter... my preference would be that it came straight to me” (GP-01)</p>                                                                                                                                                                                                                                   | <b>Difficulty interpreting results</b>  | <p>“Some people might know all the numbers and everything else, I don’t. You give me a bunch of numbers, it means nothing to me. So unless the doctor explained it to me... I’d rather talk to my doctor” (Pt-07)</p>                                                                                                                                                                            |

|                                 |                                                                                                                                                                                                                 |                              |                                                                                                                                                                                                                                                                               |
|---------------------------------|-----------------------------------------------------------------------------------------------------------------------------------------------------------------------------------------------------------------|------------------------------|-------------------------------------------------------------------------------------------------------------------------------------------------------------------------------------------------------------------------------------------------------------------------------|
| <b>Therapeutic relationship</b> | “If the patient gets a letter that’s like ‘you need to be on a statin’ and we already had a conversation that they didn’t need a statin. That could cause some issues in the therapeutic relationship.” (GP-04) | <b>Provoking Anxieties</b>   | “There are people who are coming down with every disease known to man, so for someone like that, that kind of information would just send them off the deep-end, right?” (Pt-05)                                                                                              |
| <b>Logistical concerns</b>      | “What if a person gets a check from a walk-in clinic? My concern is then is that walk-in clinic docs are just going to ignore this letter” (MD-05)                                                              | <b>Lack of engagement</b>    | “You mentioned mail outs and things like that... have they proven to be effective, though, ‘cause how many people read them? How many people understand them? I don’t think there would be a lot of point in it, ‘cause I don’t think people pay that much attention” (Pt-09) |
|                                 | “If it goes to the patient, sometimes you get lots of mail and they may just discard it” (MD-10)                                                                                                                | <b>Sense of intimidation</b> | “Some will [say] ‘I can’t talk to my doctor like that’. There will be some people who might be intimidated to initiate that conversation” (Pt-03)                                                                                                                             |

## DISCUSSION

While statins have a more limited role in certain populations (low risk and those with limited life expectancy) (52, 53), they are important for the prevention of cardiovascular disease in patients who have previous vascular disease and in those with diabetes and kidney disease (4-6, 47). In this study, both GPs and patients acknowledged that there is the potential to improve the prescription and use of statin therapy among those at high risk for cardiovascular disease. In unprompted questions, GPs acknowledged that there was a need for improved physician education on this topic, and that tools to help identify and track patients would be helpful. Patients also suggested that if directly receiving laboratory test results and information on treatment options may result in better medical care, generally supporting our hypothesis that facilitating shared decision making was a key element of a novel intervention. When shown the proposed intervention, both groups were strongly supportive of the facilitated relay intervention. While there were clear benefits to the intervention, some potential downsides were raised by both GPs and patients. In general, all recipients would prefer letters to be succinct, yet contain high yield information and provide contact information where clarification could be sought.

Many interventions have been attempted to address the problem of statin underuse. A number of patient-centered approaches have been tried with varying success (22). While active forms of education, like cognitive education and behavioural counselling seem to work (54), more passive forms of education are often unsuccessful at changing behaviour, as in the recent ISLAND trial which found their intervention, comprised of a mail and phone education strategy to encourage patients to take prescribed medication, had no impact on adherence (55). Others have found that multifaceted interventions focusing on enhancing care provision through team-based care may be effective at increasing statin adherence (56).

However, when trying to target the problem of low statin prescribing, interventions directed only at patients are not likely to work. An alternate approach is to facilitate GPs ability to identify and prescribe

1  
2  
3 441 statins, to those in whom they are appropriate (57), through audit and feedback or facilitated relay. An  
4 442 educational audit and feedback intervention regarding dyslipidemia treatment in Italian primary care  
5 443 practices was shown to increase adherence to statins by approximately 10% (58). Improved  
6 444 communication and shared decision making, which are explicit goals of facilitated relay interventions,  
7 445 can improve patient adherence (59). While these and other studies have reviewed the clinical efficacy of  
8 446 quality improvement strategies (21), few have used detailed qualitative methods as we have done. One  
9 447 large qualitative study interviewed audit and feedback experts to generate hypotheses about the  
10 448 various factors that may contribute to the efficacy of such interventions (60). Others have used  
11 449 qualitative methods to highlight the barriers physicians face in encouraging adherence (61), but ours is  
12 450 unique in using such methods to design and develop an intervention to address these challenges. Finally,  
13 451 we also appreciate that as much as there is underuse of statins, there is also overuse, for example, in  
14 452 people with short life expectancy. Perhaps interventions to increase initiation may also include a  
15 453 component that conveys statin benefits are measured in years rather than months.  
16 454

17 455 The fact that participants suggested elements of our facilitated relay intervention in the unprompted  
18 456 portion of the interviews lends credibility and face validity to the proposed intervention. However, it is  
19 457 notable that while GPs felt they would benefit from having internal systems to monitor patients'  
20 458 records, none independently suggested a strategy mediated by an independent third party (such as  
21 459 facilitated relay or audit and feedback), as we have proposed. Investigators who wish to implement  
22 460 facilitated relay interventions to enhance adherence to medical therapies can use the findings of this  
23 461 study to help develop interventions that are more likely to be acceptable to both GPs and patients. One  
24 462 of the main findings is to ensure that any information provided is brief and high yield, containing patient  
25 463 identifiers early to capture general practitioner's attention. Such interventions can be strengthened by  
26 464 incorporating education on controversial or little-known topics. Patients strongly preferred any  
27 465 correspondence to also contain direct suggestions or an action plan. Workflow and processing of these  
28 466 letters needs to be considered and interventions designed to be as minimally disruptive to clinical  
29 467 practice as possible – with most physicians preferring that it be embedded directly within the EMR; yet  
30 468 in healthcare settings (like ours) where there is marked heterogeneity in the use and type of EMRs, this  
31 469 may not be possible.  
32 470

33 471 There are limitations to this study. Firstly, as in most qualitative studies, the number of participants was  
34 472 relatively small. This concern over sample size is mitigated by the fact that physician interviews  
35 473 proceeded until the point of saturation. Patient data were not collected in this manner, and these  
36 474 themes may not be fully saturated and we appreciate this as a limitation. Furthermore, the patient  
37 475 sample we recruited may not be representative of the broader population, as many of them had  
38 476 previously stated an interest in quality improvement and research and therefore may be attuned to the  
39 477 importance of preventive therapies more than other members of the general public. Secondly, given the  
40 478 context-dependent nature of qualitative data, the applicability of these findings to other settings is not  
41 479 certain. Yet physicians in most settings face similar problems (i.e. time constraints, patient complexity  
42 480 and comorbidities and patient resistance to medical therapies) in numerous facets of medical care;  
43 481 therefore, it is conceivable that the findings of this study would apply to interactions between patients  
44 482 and GPs in other clinical settings. Due to time constraints of participants and researchers, member  
45 483 checking was not undertaken in this study. Finally, it is important to note that feedback was sought  
46 484 specifically about the proposed intervention. However, given the details reported, we feel that these  
47 485 findings are likely to be helpful to others proposing similar quality improvement interventions. One of  
48 486 the major strengths of this study is the depth and richness of the qualitative data that were collected. By  
49 487 asking questions in an open-ended manner, we were able to record detailed accounts and opinions.  
50  
51  
52  
53  
54  
55  
56  
57  
58  
59  
60

1  
2  
3 488 Another strength of this work is the fact that we also sought patient input into the development of this  
4 489 intervention, rather than relying on physician feedback alone.  
5 490

6 491 Statin therapy has been demonstrated to effectively lower cholesterol and reduce the risk of  
7 492 cardiovascular events and death in individuals at high risk of cardiovascular disease. Despite this, they  
8 493 remain underused. There are patient, provider and system factors that contribute to statin underuse.  
9 494 Facilitated relay interventions hold promise as a potential method to address this important care gap.  
10 495 Our study sought perspectives of both healthcare providers and patients, which will be incorporated  
11 496 into intervention design to maximize acceptability. Insights gained from qualitative data will be used to  
12 497 improve the likelihood of success and achieve the desired clinical impact. The insights about these  
13 498 interventions are also likely to be of interest to many researchers and clinicians who are considering and  
14 499 designing provider- and/or patient-facing interventions to improve the uptake of preventive  
15 500 medications.  
16 501

### 17 502 **Contributions**

18 503 DJTC, RCWL, KAM, TJA, HQ, AACL, GC, ML, CN, SB collaborated to develop the research question and  
19 504 methods. The study design was conceived by DJTC and SB. DJTC wrote the first draft of the study  
20 505 protocol. Data collection and analysis was completed by DJTC, RCWL and SB. KAM, TJA, HQ, AACL, GC,  
21 506 ML, and CN contributed to the interpretation and contextualization of study findings. The first draft of  
22 507 the manuscript was written by DJTC. RCWL, KAM, TJA, HQ, AACL, GC, ML, CN, and SB contributed  
23 508 substantively to further revisions of the manuscript and have consented to the publication of this  
24 509 version.  
25 510

### 26 511 **Funding**

27 512 Funding for this project was provided by a research grant to Sonia Butalia from Diabetes Canada.  
28 513

### 29 514 **Data Availability Statement**

30 515 No additional data available. Given that qualitative data are not deidentified and tell individuals'  
31 516 personal stories, data cannot be shared beyond the scope of this project, as per our research ethics  
32 517 board.  
33 518

### 34 519 **Competing Interest Statement**

35 520 DC, RL, KAM, AL, TA, HQ, GC, SB – none. CN is a director of a private laboratory that does not currently  
36 521 offer testing in the jurisdiction under study.  
37 522

38 523 Figure 1: Laboratory-Based Facilitated-Relay Intervention  
39 524

### 40 525 **References**

- 41 526  
42 527 1. World Health Organization. The top 10 causes of death 2018 [Available from:  
43 528 <https://www.who.int/news-room/fact-sheets/detail/the-top-10-causes-of-death>.  
44 529 2. Silverman MG, Ference BA, Im K, Wiviott SD, Giugliano RP, Grundy SM, et al. Association  
45 530 Between Lowering LDL-C and Cardiovascular Risk Reduction Among Different Therapeutic Interventions:  
46 531 A Systematic Review and Meta-analysis. JAMA. 2016;316(12):1289-97.  
47 532 3. Byrne P, Cullinan J, Smith SM. Statins for primary prevention of cardiovascular disease. BMJ.  
48 533 2019;367:l5674.  
49 534  
50 535  
51 536  
52 537  
53 538  
54 539  
55 540  
56 541  
57 542  
58 543  
59 544  
60 545



- 1  
2  
3 534 4. Colhoun HM, Betteridge DJ, Durrington PN, Hitman GA, Neil HA, Livingstone SJ, et al. Primary  
4 535 prevention of cardiovascular disease with atorvastatin in type 2 diabetes in the Collaborative  
5 536 Atorvastatin Diabetes Study (CARDS): multicentre randomised placebo-controlled trial. *Lancet*.  
6 537 2004;364(9435):685-96.
- 8 538 5. Baigent C, Landray MJ, Reith C, Emberson J, Wheeler DC, Tomson C, et al. The effects of  
9 539 lowering LDL cholesterol with simvastatin plus ezetimibe in patients with chronic kidney disease (Study  
10 540 of Heart and Renal Protection): a randomised placebo-controlled trial. *Lancet*. 2011;377(9784):2181-92.
- 11 541 6. Collins R, Armitage J, Parish S, Sleight P, Peto R, Heart Protection Study Collaborative G. MRC/BHF  
12 542 Heart Protection Study of cholesterol-lowering with simvastatin in 5963 people with diabetes: a  
13 543 randomised placebo-controlled trial. *Lancet*. 2003;361(9374):2005-16.
- 14 544 7. Anderson TJ, Grégoire J, Pearson GJ, Barry AR, Couture P, Dawes M, et al. 2016 Canadian  
15 545 Cardiovascular Society Guidelines for the Management of Dyslipidemia for the Prevention of  
16 546 Cardiovascular Disease in the Adult. *Canadian Journal of Cardiology*. 2016;32(11):1263-82.
- 17 547 8. Grundy SM, Stone NJ. 2018 American Heart Association/American College of  
18 548 Cardiology/Multisociety Guideline on the Management of Blood Cholesterol-Secondary Prevention.  
19 549 *JAMA Cardiol*. 2019;4(6):589-91.
- 21 550 9. Butalia S, Lewin A, Simpson S, Dasgupta K, Khan N, Pilote L, et al. Sex-based disparities in  
22 551 cardioprotective medication use in adults with diabetes. *Diabetol Metab Syndr*. 2014;5(6):117.
- 23 552 10. Anderson TJ, Grégoire J, Hegele RA, Couture P, Mancini GBJ, McPherson R, et al. 2012 Update of  
24 553 the Canadian Cardiovascular Society Guidelines for the Diagnosis and Treatment of Dyslipidemia for the  
25 554 Prevention of Cardiovascular Disease in the Adult. *Canadian Journal of Cardiology*. 2013;29(2):151-67.
- 26 555 11. Johansen ME, Green LA, Sen A, Kircher S, Richardson CR. Cardiovascular Risk and Statin Use in  
27 556 the United States. *The Annals of Family Medicine*. 2014;12(3):215-23.
- 29 557 12. Gamble JM, Butalia S. Medical Practice Variations in Diabetes Mellitus. In: Johnson A, Stukel T,  
30 558 editors. *Medical Practice Variations*. Health Services Research: Springer US; 2015. p. 1-40.
- 31 559 13. Tu JV, Chu A, Maclagan L, Austin PC, Johnston S, Ko DT, et al. Regional variations in ambulatory  
32 560 care and incidence of cardiovascular events. *Canadian Medical Association Journal*. 2017;189(13):E494-  
33 561 E501.
- 34 562 14. Hennessy DA, Tanuseputro P, Tuna M, Bennett C, Perez R, Shields M, et al. Population health  
35 563 impact of statin treatment in Canada. *Health Rep*. 2016;27(1):20-8.
- 36 564 15. Yang Q, Zhong Y, Gillespie C, Merritt R, Bowman B, George MG, et al. Assessing potential  
37 565 population impact of statin treatment for primary prevention of atherosclerotic cardiovascular diseases  
38 566 in the USA: population-based modelling study. *BMJ Open*. 2017;7(1):e011684.
- 39 567 16. Butalia S, Lee-Krueger R, McBrien K, Leung A, Anderson T, Quan H, et al. Barriers and Facilitators  
40 568 to Using Statins: A Qualitative Study with Patients and Family Physicians *Canadian Journal of Cardiology*  
41 569 *Open*. 2020;Online ahead of print.
- 42 570 17. Schroff P, Gamboa CM, Durant RW, Oikeh A, Richman JS, Safford MM. Vulnerabilities to Health  
43 571 Disparities and Statin Use in the REGARDS (Reasons for Geographic and Racial Differences in Stroke)  
44 572 Study. *J Am Heart Assoc*. 2017;6(9).
- 45 573 18. Cohen JD, Brinton EA, Ito MK, Jacobson TA. Understanding Statin Use in America and Gaps in  
46 574 Patient Education (USAGE): an internet-based survey of 10,138 current and former statin users. *J Clin*  
47 575 *Lipidol*. 2012;6(3):208-15.
- 48 576 19. Jacobson TA, Khan A, Maki KC, Brinton EA, Cohen JD. Provider recommendations for patient-  
49 577 reported muscle symptoms on statin therapy: Insights from the Understanding Statin Use in America  
50 578 and Gaps in Patient Education survey. *J Clin Lipidol*. 2018;12(1):78-88.
- 51 579 20. Worrall G, Chaulk P, Freake D. The effects of clinical practice guidelines on patient outcomes in  
52 580 primary care: a systematic review. *CMAJ*. 1997;156(12):1705-12.

- 1  
2  
3 581 21. Tricco AC, Ivers NM, Grimshaw JM, Moher D, Turner L, Galipeau J, et al. Effectiveness of quality  
4 582 improvement strategies on the management of diabetes: a systematic review and meta-analysis. *Lancet*.  
5 583 2012;379(9833):2252-61.
- 6 584 22. Rash JA, Campbell DJ, Tonelli M, Campbell TS. A systematic review of interventions to improve  
7 585 adherence to statin medication: What do we know about what works? *Prev Med*. 2016;90:155-69.
- 8 586 23. Walsh J, McDonald KM, Shojania KG, Sundaram V, Nayak S, Davies S, et al. Closing the Quality  
9 587 Gap: A Critical Analysis of Quality Improvement Strategies (Vol 3: Hypertension Care). AHRQ Technical  
10 588 Reviews. Rockville (MD)2005.
- 11 589 24. Zhang Y, Moran AE. Trends in the Prevalence, Awareness, Treatment, and Control of  
12 590 Hypertension Among Young Adults in the United States, 1999 to 2014. *Hypertension*. 2017;70(4):736-42.
- 13 591 25. Jardine MJ, Kasiske B, Adu D, Alrukhaimi M, Ashuntantang GE, Basnet S, et al. Closing the gap  
14 592 between evidence and practice in chronic kidney disease. *Kidney Int Suppl* (2011). 2017;7(2):114-21.
- 15 593 26. Walsh JM, McDonald KM, Shojania KG, Sundaram V, Nayak S, Lewis R, et al. Quality  
16 594 improvement strategies for hypertension management: a systematic review. *Med Care*. 2006;44(7):646-  
17 595 57.
- 18 596 27. Campbell DJ, Sargious P, Lewanczuk R, McBrien K, Tonelli M, Hemmelgarn B, et al. Use of  
19 597 chronic disease management programs for diabetes: in Alberta's primary care networks. *Can Fam*  
20 598 *Physician*. 2013;59(2):e86-92.
- 21 599 28. Sandelowski M. Whatever happened to qualitative description? *Res Nurs Health*. 2000;23(4):7.
- 22 600 29. Pope C, van Royen P, Baker R. Qualitative methods in research on healthcare quality. *Qual Saf*  
23 601 *Health Care*. 2002;11(2):148-52.
- 24 602 30. Ayala GX, Elder JP. Qualitative methods to ensure acceptability of behavioral and social  
25 603 interventions to the target population. *J Public Health Dent*. 2011;71 Suppl 1:S69-79.
- 26 604 31. Tong A, Sainsbury P, Craig J. Consolidated criteria for reporting qualitative research (COREQ): a  
27 605 32-item checklist for interviews and focus groups. *Int J Qual Health Care*. 2007;19(6):349-57.
- 28 606 32. Michie S, van Stralen MM, West R. The behaviour change wheel: a new method for  
29 607 characterising and designing behaviour change interventions. *Implement Sci*. 2011;6:42.
- 30 608 33. Cane J, O'Connor D, Michie S. Validation of the theoretical domains framework for use in  
31 609 behaviour change and implementation research. *Implement Sci*. 2012;7:37.
- 32 610 34. Michie S, Johnston M, Francis J, Hardeman W, Eccles M. From Theory to Intervention: Mapping  
33 611 Theoretically Derived Behavioural Determinants to Behaviour Change Techniques. *Applied Psychology*.  
34 612 2008;57(4):660-80.
- 35 613 35. Barrett B, Ricco J, Wallace M, Kiefer D, Rakel D. Communicating statin evidence to support  
36 614 shared decision-making. *BMC Fam Pract*. 2016;17:41.
- 37 615 36. Weymiller AJ, Montori VM, Jones LA, Gafni A, Guyatt GH, Bryant SC, et al. Helping patients with  
38 616 type 2 diabetes mellitus make treatment decisions: statin choice randomized trial. *Arch Intern Med*.  
39 617 2007;167(10):1076-82.
- 40 618 37. Santana M, Zelinsky S, Ahmed S, Doktorchik C, James M, Wilton S, et al. Working Together with  
41 619 Patients and Clinician Researchers to Improve Cardiovascular Health. 2018 SPOR Summit; Ottawa, ON.
- 42 620 38. Santana M, Zelinsky S, Ahmed S, Doktorchik C, James M, Wilton S, et al. Working Together: Co-  
43 621 designing Priorities for Patient-Oriented Cardiovascular Research by Patients, Clinicians, and  
44 622 Researchers. Canadian Association for Health Services and Policy Research (CAHSPR); Halifax, NS2019.
- 45 623 39. Guest G, Namey E, Taylor J, Eley N, McKenna K. Comparing focus groups and individual  
46 624 interviews: findings from a randomized study. *Int J Soc Res Methodol*. 2017;20(6):693-708.
- 47 625 40. Kedward J, Dakin L. A qualitative study of barriers to the use of statins and the implementation  
48 626 of coronary heart disease prevention in primary care. *Br J Gen Pract*. 2003;53(494):684-9.
- 49 627 41. Maningat P, Gordon BR, Breslow JL. How do we improve patient compliance and adherence to  
50 628 long-term statin therapy? *Curr Atheroscler Rep*. 2013;15(1):291.

- 1  
2  
3 629 42. Walker JL. The use of saturation in qualitative research. *Can J Cardiovasc Nurs*. 2012;22(2):37-  
4 630 46.  
5 631 43. Hsieh HF, Shannon SE. Three approaches to qualitative content analysis. *Qual Health Res*.  
6 632 2005;15(9):1277-88.  
7  
8 633 44. Santana MJ, Zelinsky S, Ahmed S, Doktorchik C, James M, Wilton S, et al. Patients, clinicians and  
9 634 researchers working together to improve cardiovascular health: a qualitative study of barriers and  
10 635 priorities for patient-oriented research. *BMJ Open*. 2020;10(2):e031187.  
11 636 45. Drew P, Jones B, Norton D. Team effectiveness in primary care networks in Alberta. *Healthc Q*.  
12 637 2010;13(3):33-8.  
13 638 46. Manns BJ, Tonelli M, Zhang J, Campbell DJT, Sargious P, Ayyalasomayajula B, et al. Enrolment in  
14 639 primary care networks: impact on outcomes and processes of care for patients with diabetes. *Canadian*  
15 640 *Medical Association Journal*. 2012;184(2):E144-E52.  
16 641 47. Anderson TJ, Gregoire J, Pearson GJ, Barry AR, Couture P, Dawes M, et al. 2016 Canadian  
17 642 Cardiovascular Society Guidelines for the Management of Dyslipidemia for the Prevention of  
18 643 Cardiovascular Disease in the Adult. *Can J Cardiol*. 2016;32(11):1263-82.  
19 644 48. Toward Optimized Practice Cardiovascular Disease Risk Working Group. Prevention and  
20 645 management of cardiovascular disease risk in primary care clinical practice guideline Edmonton, AB:  
21 646 Toward Optimized Practice; 2015 [Available from:  
22 647 <https://top.albertadoctors.org/CPGs/Lists/CPGDocumentList/CVD-Risk-CPG.pdf>.  
23 648  
24 648 49. Tibrewala A, Jivan A, Oetgen WJ, Stone NJ. A Comparative Analysis of Current Lipid Treatment  
25 649 Guidelines: Nothing Stands Still. *J Am Coll Cardiol*. 2018;71(7):794-9.  
26 650 50. Toward Optimized Practice (TOP) Cardiovascular Disease Risk Working Group. Prevention and  
27 651 management of cardiovascular disease risk in primary care clinical practice  
28  
29  
30 652 guideline 2015 [Available from:  
31 653 <http://www.topalbertadoctors.org/download/1655/Lipid%20Pathway%20CPG.pdf?> 20150916105016.  
32 654  
33 654 51. Catapano AL, Graham I, De Backer G, Wiklund O, Chapman MJ, Drexel H, et al. 2016 ESC/EAS  
34 655 Guidelines for the Management of Dyslipidaemias. *Rev Esp Cardiol (Engl Ed)*. 2017;70(2):115.  
35 656 52. Kristensen M, Christensen PM, Hallas J. The effect of statins on average survival in randomised  
36 657 trials, an analysis of end point postponement. *BMJ Open*. 2014;5(007118).  
37 658 53. Abramson JD, Rosenberg HG, Jewell N, Wright JM. Should people at low risk of cardiovascular  
38 659 disease take a statin? *BMJ*. 2013;347:f6123.  
39 660 54. Jornten-Karlsson M, Pintat S, Molloy-Bland M, Berg S, Ahlqvist M. Patient-Centered  
40 661 Interventions to Improve Adherence to Statins: A Narrative Synthesis of Systematically Identified  
41 662 Studies. *Drugs*. 2016;76(15):1447-65.  
42 663 55. Ivers NM, Schwalm JD, Bouck Z, McCready T, Taljaard M, Grace SL, et al. Interventions  
43 664 supporting long term adherence and decreasing cardiovascular events after myocardial infarction  
44 665 (ISLAND): pragmatic randomised controlled trial. *BMJ*. 2020;369:m1731.  
45 666 56. van Driel ML, Morledge MD, Ulep R, Shaffer JP, Davies P, Deichmann R. Interventions to improve  
46 667 adherence to lipid-lowering medication. *Cochrane Database Syst Rev*. 2016;12:CD004371.  
47 668 57. Kaya H, Beton O, Yilmaz M. How to increase level of patients' awareness regarding the  
48 669 importance of statins despite the influence of the media? *International Journal of Cardiology*.  
49 670 2016;207:164.  
50 671 58. Casula M, Tragni E, Piccinelli R, Zambon A, De Fendi L, Scotti L, et al. A simple informative  
51 672 intervention in primary care increases statin adherence. *Eur J Clin Pharmacol*. 2016;72(2):227-34.  
52 673 59. Wilson SR, Strub P, Buist AS, Knowles SB, Lavori PW, Lapidus J, et al. Shared treatment decision  
53 674 making improves adherence and outcomes in poorly controlled asthma. *Am J Respir Crit Care Med*.  
54 675 2010;181(6):566-77.  
55  
56  
57  
58  
59  
60

- 1  
2  
3 676 60. Colquhoun HL, Carroll K, Eva KW, Grimshaw JM, Ivers N, Michie S, et al. Advancing the literature  
4 677 on designing audit and feedback interventions: identifying theory-informed hypotheses. *Implement Sci.*  
5 678 2017;12(1):117.  
6 679 61. Kvarnström K, Airaksinen M, Liira H. Barriers and facilitators to medication adherence: a  
7 680 qualitative study with general practitioners. *BMJ Open.* 2018;8(1):e015332.

9  
10 681  
11 682  
12  
13  
14  
15  
16  
17  
18  
19  
20  
21  
22  
23  
24  
25  
26  
27  
28  
29  
30  
31  
32  
33  
34  
35  
36  
37  
38  
39  
40  
41  
42  
43  
44  
45  
46  
47  
48  
49  
50  
51  
52  
53  
54  
55  
56  
57  
58  
59  
60

For peer review only



**Figure 1: Laboratory-Based Facilitated-Relay Intervention**  
 Dashed lines: traditional interface between lab and ordering provider

## **Appendix A: Interview Guide for health care professional**

Thank you for agreeing to participate in our interview today. We wish to discuss your experience in managing dyslipidemia (or high cholesterol) in order to better understand how we might help family physicians treat dyslipidemia (or high cholesterol). We have a proposed intervention and would like your assistance in how to enrich it.

### **1. Experience managing dyslipidemia**

Please describe any challenges or difficulties that you experience in identifying and managing patients with dyslipidemia?

- Do you use any resources to guide you in the management of these patients?
  - Canadian Cardiovascular Society Guidelines
  - Diabetes Canada Guidelines
  - TOP guidelines

In addition to measuring a patient's lipids, what are some other parameters that you consider when assessing a patient for dyslipidemia, and how to optimally manage this condition?

### **2. Dyslipidemia-related practices**

In your practice, do you find it helpful to quantify a patient's LDL-cholesterol or get a lipid panel?

If yes,

- Are there certain populations in whom you find this test most helpful?
- What is your chosen method/diagnostic test to do so?
  - Fasting or random lipid profile
    - Total cholesterol
    - HDL-cholesterol
    - LDL-cholesterol
  - ApoB
- How does this information change your clinical practice?
- How often do you repeat cholesterol testing for patients with conditions that puts them at high risk for cardiovascular disease (i.e. previous clinical cardiovascular disease, diabetes, chronic kidney disease)?

If no,

- Why is it not particularly helpful?
  - Don't know which test to do
  - Don't know how to order it
  - Don't know in whom it is indicated

- Don't know what to do with the results

In thinking about your practice, what proportion of your patients with conditions that put them at high risk for cardiovascular disease (i.e. previous myocardial infarction, stroke, diabetes, and/or chronic kidney disease) have had their lipid profile assessed in the past 12 months?

What are some of the reasons this does not happen (in your practice and in others')?

- Didn't think it was indicated/for whom it is indicated
- Too many things to attend to
- Not perceived to be an important issue amongst all other disease/conditions that FPs manage
- Patient factors (doesn't go for test)

### 3. Intervention

If we wanted to increase the use of statins among people at high risk for cardiovascular disease (i.e. previous clinical cardiovascular disease, diabetes, chronic kidney disease), what might be done? What tools, resources, prompts may help facilitate increased treatment of dyslipidemia?

In your opinion, what type of educational intervention is most effective in disseminating clinical practice guidelines to family physicians? (i.e. conferences, local lectures, treatment recommendations on lab results).

We are considering the use of a facilitated relay strategy, where patient's information from Calgary Laboratory Services is used to identify those who have indications for statin therapy. Those who are not currently filling statin prescriptions at the pharmacy would receive a letter from the lab indicating that they may benefit from statins. They will be encouraged to bring this letter in to discuss this with you.

How would family physicians respond to receiving a letter from the lab prompting them to consider starting their patient on statin treatment?

- What would be the characteristics of such a letter that would make it more likely to succeed?
  - Short/Pictorial/Colorful

Would it be more helpful to have this information specific about one named patient, or rather have an audit of your entire practice that would indicate what proportion of eligible patients with statin-indicated conditions are currently being treated with statins? (i.e. Audit and Feedback)

1  
2  
3 How should such an intervention either on a specific patient or about your entire practice  
4 be received?  
5

- 6 • Mail/Fax/EMR/combo  
7

8  
9 How would such an intervention be processed in your office?  
10

- 11 • Who would open the envelope?
- 12 • What would they do with it? (give it to you, put it in the patient's chart)
- 13 • How likely would you be to see this information?  
14  
15

16 Who should this letter be coming from in order to have it received in the most positive  
17 way possible?  
18

- 19 • A non-clinical academic researcher (Dr. XXXX)
- 20 • Head of the Calgary Laboratory Services (Dr. Christopher Naugler)
- 21 • A lipid specialist (Dr. Sonia Butalia, Alex Leung)
- 22 • An academic family doctor (Dr. Kerry McBrien)
- 23 • A respected community family doctor
- 24 • The lead of Dyslipidemia Guidelines (Dr. Todd Anderson)
- 25 • Dr. Cello Tonelli, Associate Vice-President (Research) at the University of  
26 Calgary
- 27 • Dr. Richard Lewanczuk, Senior Medical Director for Primary Care, Chronic  
28 Disease Management, Community and Rural for Alberta Health Services
- 29 • Someone else  
30  
31  
32  
33

34  
35 Would it be helpful to receive a reminder or follow-up letter?  
36

- 37 • How much later should this be sent, so as to be useful and not annoying?  
38

39 If the intervention provided you with patient-oriented material about this subject, and  
40 asked you to share it with your patients, how would you feel about doing so?  
41

- 42 • What content should be included in this patient-oriented material to enhance statin  
43 use?
- 44 • What format should this material be in? Electronic, hard-copy? How should it be  
45 delivered? Mail, email?
- 46 • Would you share it in a clinical setting?
- 47 • Would you be willing to mail it to patients directly?  
48  
49

50  
51 Do you have any additional comments or suggestions for developing an intervention to  
52 increase the use statins in people at high risk for cardiovascular disease (i.e. previous  
53 clinical cardiovascular disease, diabetes, chronic kidney disease) in primary care?  
54  
55  
56  
57  
58  
59



1  
2  
3 Thank you for participating in today's interview. Using the information you provided, we  
4 will work on developing an intervention to improve the treatment of dyslipidemia in  
5 patients who are at high risk for cardiovascular disease (i.e. previous clinical  
6 cardiovascular disease, diabetes, chronic kidney disease)?  
7  
8

### 9 **Appendix B: Focus Group Guide for patients**

10 Thank you for agreeing to participate in our focus group today. There are many risk  
11 factors for heart attacks and stroke. Today we want to focus on one risk factor being high  
12 cholesterol. High cholesterol is a major risk factor for heart attacks, strokes and  
13 circulatory problems. There are no symptoms of high cholesterol and it is diagnosed by a  
14 lab test that your doctor would order. Importantly, we work for the University of Calgary  
15 and have no relationship with any medication companies.  
16  
17

18 We wish to discuss your experience in managing *cholesterol* with medications in order to  
19 better understand how we might help family physicians (*doctors*) treat high cholesterol.  
20  
21

#### 22 **1. Experience with high cholesterol**

23 Think about the last time your doctor has sent you for a cholesterol test. Did your doctor  
24 talk to you about the results? Treatment? What kind of treatment was discussed (diet,  
25 exercise, a medication)?  
26  
27

28 Put yourself in the position of being told that you need to take a medication for your  
29 cholesterol. What factors would make you more likely to take it? What factors would  
30 make you not want to take it? Reasons, side effects, costs  
31  
32

- 33 • Would you use any resources to help you decide?
  - 34 ○ Doctor
  - 35 ○ Dietician
  - 36 ○ Internet
  - 37 ○ Family, friends
  - 38
  - 39

40 What would you think if your doctor told you that your cholesterol wasn't all that high,  
41 but because of your other health conditions she wanted to start you on a cholesterol  
42 lowering medication to reduce your risk of heart attack and stroke?  
43  
44

45 Do you think it would be helpful to get the actual result of your cholesterol level sent  
46 directly from the lab to you?  
47  
48

49  
50 Currently, cancer screening programs send letters to patients about their results and next  
51 steps. What are your thoughts for something similar for high cholesterol?  
52  
53  
54  
55  
56  
57  
58  
59

1  
2  
3 What about information about recommended treatments and potential side effects?  
4 Would you find this to be invasive of your privacy (i.e. info from the lab about treatment  
5 and not your doctor)?  
6  
7

8  
9  
10 How would you feel about taking a letter with these recommendations to your doctor to  
11 discuss about a medication for high cholesterol?  
12

13  
14 How do you feel your doctor would respond to you bringing this information?  
15  
16

17  
18 What things on the letter would make it helpful?  
19

20 -length, colour, graphics,  
21  
22

23  
24  
25 Who should this letter be coming from in order to have it received in the most positive  
26 way possible?  
27

- 28 • A non-clinical academic researcher (Dr. XXXX)
- 29 • Head of the Calgary Laboratory Services (Dr. Christopher Naugler)
- 30 • A lipid specialist (Dr. Sonia Butalia, Alex Leung)
- 31 • An academic family doctor (Dr. Kerry McBrien)
- 32 • A respected community family doctor
- 33 • The lead of Dyslipidemia Guidelines (Dr. Todd Anderson)
- 34 • Dr. Richard Lewanczuk, Senior Medical Director for Primary Care, Chronic  
35 Disease Management, Community and Rural for Alberta Health Services
- 36 • Someone else  
37  
38  
39

40  
41 Would it be helpful to receive a reminder or follow-up letter?  
42

- 43 • How much later should this be sent, so as to be useful and not annoying?  
44

45 Do you have any additional comments or suggestions for developing an way to increase  
46 the use the treatment of people with high cholesterol?  
47  
48  
49  
50  
51  
52  
53  
54  
55  
56  
57  
58  
59  
60

## Appendix C: Facilitated Relay Letter



UNIVERSITY OF  
CALGARY

Date: XXXX-XX-XX

Dear Dr. [Physician Last Name],

RE: [Patient Name]

As you may recall, your Primary Care Network is involved in a study with the University of Calgary. This is an investigator-initiated study with public funding from the [*Canadian Institutes of Health Research*].

Dyslipidemia is a major risk factor for myocardial infarction and stroke<sup>1-2</sup>. As you know, in patients like [name], statins are indicated for their dyslipidemia because they are proven to reduce cardiovascular outcomes and mortality<sup>3-4</sup>. Because of numerous randomized controlled trials, guidelines recommend statin use in individuals with history of previous cardiovascular disease, diabetes, or chronic renal failure<sup>5</sup>.

We are writing to you to consider initiating a statin in your patient. We know the importance of the therapeutic relationship that you have with your patients and know that we do not know your patient like you do. The purpose of this letter is to assist in you in your discussion with [name], about using a statin medication.

[Name] may not be taking a statin because of underestimation of their personal risk of cardiovascular disease, fear of side-effects, previous side-effects, or cost. If cost is a concern, compassionate programs are available for several statin medications. Please kindly call our study telephone number to assist in facilitating this.

The most common side effect from statins is muscle aches, and the frequency of statin-induced rhabdomyolysis is very rare (i.e. < 1 in 10,000 patients per year on statins)<sup>6</sup>. Studies suggest that there are several proven methods for managing people who have experienced muscle aches. For those unable to tolerate daily high intensity statins, some statin is still better than none, and the following strategies can be considered:

1. *Reducing the dose of statin.* i.e. Atorvastatin 10-20mg or Rosuvastatin 2.5-5mg<sup>7</sup>.
2. *Trying a low potency statin medication.* Lower potency statins seem to be less strongly associated with muscle aches. Fluvastatin and Pravastatin were much less likely than Simvastatin and Atorvastatin to cause myalgia<sup>8</sup>. For your reference, maximum doses of these low potency statins, and their equivalencies are:

1  
2 Pravastatin 80mg = Atorvastatin 20mg = Rosuvastatin 10mg  
3 Fluvastatin XL 80mg = Atorvastatin 10mg = Rosuvastatin 5mg  
4

- 5  
6 3. *Reducing dose or lengthening administration interval.* Studies have demonstrated that  
7 greater than 70% of patients affected by myalgias were able to tolerate every other day  
8 administration with no recurrence of muscle symptoms<sup>9</sup>.  
9

10 There is a small chance that your patient may have been misclassified with a statin indicated  
11 condition. We sincerely apologize for this and would be most appreciative if you can call or fax us to  
12 let us know.  
13

14  
15 We welcome any questions or comments so please kindly contact us at 403-955-8327 (or fax 403-955-  
16 8249), for more information.  
17

18  
19 Sincerely,  
20 Sonia Butalia MD, FRCPC, MSc and the study team  
21  
22  
23  
24  
25  
26  
27  
28  
29  
30  
31

## 32 References

- 33  
34  
35 1. Yusuf S, Hawken S, Ôunpuu S, et al. *The Lancet*. 2004;364(9438):937-952.  
36 2. O'Donnell MJ, Xavier D, Liu L, et al. *The Lancet*. 2010;376(9735):112-123.  
37 3. Cholesterol Treatment Trialists Collaboration. *The Lancet*. 2010;376(9753):1670-1681.  
38 4. Cholesterol Treatment Trialists Collaborators. *The Lancet*. 2012;380(9841):581-590.  
39 5. Anderson TJ, Grégoire J, Pearson GJ, et al. 2016 Canadian Cardiovascular Society Guidelines  
40 for the Management of Dyslipidemia for the Prevention of Cardiovascular Disease in the Adult.  
41 *Canadian Journal of Cardiology*. 2016;32(11):1263-1282.  
42 6. Graham DJ, Staffa JA, Shatin D, et al. *JAMA*. 2004;292(21):2585-2590.  
43 7. Arca M, Pigna G. *Diabetes, Metabolic Syndrome and Obesity: Targets and Therapy*. 2011;4:155-  
44 166.  
45 8. Bruckert E, Hayem G, Dejager S, Yau C, Bégaud B. *Cardiovascular Drugs and Therapy*.  
46 December 01 2005;19(6):403-414.  
47 9. Belloc S, Paoletti R, Corsini A. *Circulation*. June 15, 2004 2004;109(23 suppl 1):III-50-III-57.  
48  
49  
50  
51  
52  
53  
54  
55  
56  
57  
58  
59  
60

**Strategies for Enhancing Cholesterol Lowering Medication Use  
Among Patients at High Cardiovascular Disease Risk: Patient and  
General Practitioners' Perspectives on a Facilitated Relay  
Intervention**

Consolidated criteria for reporting qualitative studies (COREQ): 32-item checklist

| No | Item                                                       | Guide questions/<br>description                             | Response           |
|----|------------------------------------------------------------|-------------------------------------------------------------|--------------------|
|    | <b>Domain 1:<br/>Research<br/>team and<br/>reflexivity</b> |                                                             |                    |
|    | Personal<br>Characteristics                                |                                                             |                    |
| 1. | Interviewer/facilitator                                    | Which author/s conducted the interview or focus group?      | Line 137           |
| 2. | Credentials                                                | What were the researcher's credentials? <i>E.g. PhD, MD</i> | Author information |
| 3. | Occupation                                                 | What was their occupation at the time of the study?         | Line 137           |
| 4. | Gender                                                     | Was the researcher male or female?                          | Line 137           |
| 5. | Experience and training                                    | What experience or training did the researcher have?        | Line 137           |

| No                                | Item                                     | Guide questions/<br>description                                                                                                                                 | Response                          |
|-----------------------------------|------------------------------------------|-----------------------------------------------------------------------------------------------------------------------------------------------------------------|-----------------------------------|
|                                   | Relationship with participants           |                                                                                                                                                                 |                                   |
| 6.                                | Relationship established                 | Was a relationship established prior to study commencement?                                                                                                     | Line 138-139                      |
| 7.                                | Participant knowledge of the interviewer | What did the participants know about the researcher? <i>e.g. personal goals, reasons for doing the research</i>                                                 | Not discussed                     |
| 8.                                | Interviewer characteristics              | What characteristics were reported about the interviewer/facilitator? <i>e.g. Bias, assumptions, reasons and interests in the research topic</i>                | Not discussed                     |
| <b>Domain 2:<br/>study design</b> |                                          |                                                                                                                                                                 |                                   |
|                                   | Theoretical framework                    |                                                                                                                                                                 |                                   |
| 9.                                | Methodological orientation and Theory    | What methodological orientation was stated to underpin the study? <i>e.g. grounded theory, discourse analysis, ethnography, phenomenology, content analysis</i> | Qualitative Description – Line 98 |

| No  | Item                         | Guide questions/<br>description                                                           | Response                                                          |
|-----|------------------------------|-------------------------------------------------------------------------------------------|-------------------------------------------------------------------|
|     | Participant selection        |                                                                                           |                                                                   |
| 10. | Sampling                     | How were participants selected? <i>e.g. purposive, convenience, consecutive, snowball</i> | GP – Snowball (line 106-107)<br>Patients – Convenience (line 116) |
| 11. | Method of approach           | How were participants approached? <i>e.g. face-to-face, telephone, mail, email</i>        | Line 106-120                                                      |
| 12. | Sample size                  | How many participants were in the study?                                                  | Line 173<br>Line 186                                              |
| 13. | Non-participation            | How many people refused to participate or dropped out? Reasons?                           | Line 176-177                                                      |
|     | Setting                      |                                                                                           |                                                                   |
| 14. | Setting of data collection   | Where was the data collected? <i>e.g. home, clinic, workplace</i>                         | Line 137<br>Line 142                                              |
| 15. | Presence of non-participants | Was anyone else present besides the participants and researchers?                         | Line 143                                                          |
| 16. | Description of sample        | What are the important characteristics of the sample? <i>e.g. demographic data, date</i>  | Line 174-195                                                      |

| No                                         | Item                   | Guide questions/<br>description                                               | Response                       |
|--------------------------------------------|------------------------|-------------------------------------------------------------------------------|--------------------------------|
|                                            | Data collection        |                                                                               |                                |
| 17.                                        | Interview guide        | Were questions, prompts, guides provided by the authors? Was it pilot tested? | Appendix A& B                  |
| 18.                                        | Repeat interviews      | Were repeat interviews carried out? If yes, how many?                         | No                             |
| 19.                                        | Audio/visual recording | Did the research use audio or visual recording to collect the data?           | Line 146                       |
| 20.                                        | Field notes            | Were field notes made during and/or after the interview or focus group?       | Line 143-144                   |
| 21.                                        | Duration               | What was the duration of the interviews or focus group?                       | Line 142-143                   |
| 22.                                        | Data saturation        | Was data saturation discussed?                                                | Line 140 + limitations section |
| 23.                                        | Transcripts returned   | Were transcripts returned to participants for comment and/or correction?      | No                             |
| <b>Domain 3:<br/>analysis and findings</b> |                        |                                                                               |                                |



| No            | Item                           | Guide questions/<br>description                                                                                                          | Response                 |
|---------------|--------------------------------|------------------------------------------------------------------------------------------------------------------------------------------|--------------------------|
| Data analysis |                                |                                                                                                                                          |                          |
| 24.           | Number of data coders          | How many data coders coded the data?                                                                                                     | Line 156-160             |
| 25.           | Description of the coding tree | Did authors provide a description of the coding tree?                                                                                    | Line 157                 |
| 26.           | Derivation of themes           | Were themes identified in advance or derived from the data?                                                                              | Line 157-158 (inductive) |
| 27.           | Software                       | What software, if applicable, was used to manage the data?                                                                               | Line 164-165             |
| 28.           | Participant checking           | Did participants provide feedback on the findings?                                                                                       | Line 414-415             |
| Reporting     |                                |                                                                                                                                          |                          |
| 29.           | Quotations presented           | Were participant quotations presented to illustrate the themes / findings? Was each quotation identified? e.g. <i>participant number</i> | In-text and Table 3      |
| 30.           | Data and findings consistent   | Was there consistency between the data presented and the findings?                                                                       | Yes                      |

| No  | Item                    | Guide questions/<br>description                                        | Response        |
|-----|-------------------------|------------------------------------------------------------------------|-----------------|
| 31. | Clarity of major themes | Were major themes clearly presented in the findings?                   | Results section |
| 32. | Clarity of minor themes | Is there a description of diverse cases or discussion of minor themes? | Table 2 & 3     |
